# Supplementary material for: Catalytic enantioselective synthesis of indolizino[8,7-b]indole alkaloid derivatives based on the tandem reaction of tertiary enamides
Source: Royal Society of Chemistry journal article supplement (doi:10.1039/d0qo01147a), 2020-12-10

## Supporting Information

### Catalytic Enantioselective Synthesis of Indolizino[8,7-*b*]indole Alkaloid Derivatives Based on the Tandem Reaction of Tertiary Enamides

Xin-Ming Xu<sup>a,\*</sup>, Ming Xie,<sup>b</sup> Jiazhu Li<sup>a</sup>, Mei-Xiang Wang<sup>b,\*</sup>

<sup>a</sup> College of Chemistry and Chemical Engineering, Yantai University, Yantai 264005, China

<sup>b</sup> Key Laboratory of Bioorganic Phosphorus Chemistry and Chemical Biology (Ministry of Education), Department of Chemistry, Tsinghua University, Beijing 100084 China

Email: xin\_mingxu@163.com

## Table of Contents

|                                                                                    |    |
|------------------------------------------------------------------------------------|----|
| 1. General Information .....                                                       | 3  |
| 2. Preparation of Enamides .....                                                   | 3  |
| 3. Lewis Acid Catalyzed Reaction of <b>1</b> .....                                 | 7  |
| 4. Optimization of Catalytic Enantioselective Reaction Conditions .....            | 11 |
| 5. Synthesis of Enantioenriched Indolizino[8,7- <i>b</i> ]indole Derivatives ..... | 13 |
| 6. Synthesis of <b>3</b> , <b>4</b> and <b>5</b> .....                             | 31 |
| 7. The X-ray data of compounds <b>2b</b> .....                                     | 37 |
| 8. References .....                                                                | 37 |
| 9. Copies of <sup>1</sup> H NMR and <sup>13</sup> C NMR Spectra of Products .....  | 38 |

## 1. General information

All chemicals were dried or purified according to standard procedures prior to use. Flash column chromatography was performed on silica gel (100-200). Reactions were monitored using pre-coated, glass-backed silica gel plates and visualized by means of UV irradiation (254 nm) or  $\text{KMnO}_4$ , phosphomolybdic acid, ninhydrine, pancaldi, and *p*-anisaldehyde vanillin.  $^1\text{H}$  NMR and  $^{13}\text{C}$  NMR spectra were recorded using 400 MHz spectrometers at ambient temperature.  $^1\text{H}$  frequency is at 400.13 MHz and  $^{13}\text{C}$  frequency is at 100.62 MHz. Chemical shifts are reported in ppm with either tetramethylsilane or the residual solvent resonance used as an internal standard. Abbreviations are used in the description of NMR data as follows: chemical shift ( $\delta$ , ppm), multiplicity (s = singlet, d = doublet, t = triplet, m = multiplet), coupling constant ( $J$ , Hz). Infrared spectra were recorded using a FT-IR spectrometer with KBr discs in the  $4000\text{-}400\text{ cm}^{-1}$  region. Mass spectra was measured using mass spectrometers. All yields reported were isolated yields and ee values were determined by HPLC using Daicel ASH or ODH chiral columns eluted with a mixture of isopropanol and hexane at  $25\text{ }^\circ\text{C}$ .

## 2. Preparation of Tertiary Enamides

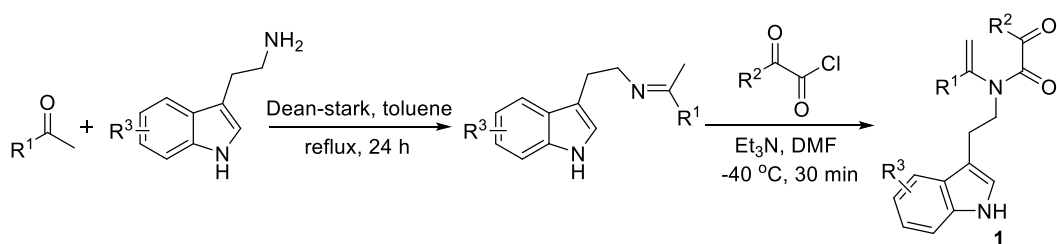

*Step 1.* The toluene solution of tryptamine (0.5 M) and ketone (0.5 M) was vigorously stirred with Dean-stark at reflux until the conversion of amine to imine was completed. The mixture was concentrated in vacuo to give a crude imine product which was used immediately without further purification.

*Step 2.* Under argon atmosphere, imine (5 mmol) was dissolved in DMF (10 mL), and then  $\text{Et}_3\text{N}$  (6 mmol) was added. After cooling to  $-40\text{ }^\circ\text{C}$ , acyl chloride (6

mmol) was added dropwise during 20 min. The resulting mixture was kept stirring at -40°C for another 30 min. A saturated aqueous NaHCO<sub>3</sub> solution (20 mL) was added to quench the reaction. The mixture was extracted with ethyl acetate (3 × 50 mL), and washed with brine (2 × 50 mL). The organic layer was dried over anhydrous Na<sub>2</sub>SO<sub>4</sub>, and concentrated under vacuum. The residue was chromatographed on a silica gel column eluted with a mixture of petroleum ether/ethyl acetate (5:1) to give a pure enamide product **1**. The structure of tertiary enamides was fully characterized and the characterization data are listed below.

***N*-(2-(1*H*-indol-3-yl)ethyl)-2-oxo-2-phenyl-*N*-(1-phenylvinyl)acetamide (**1a**)**

White solid (63% yield, 2 steps). m.p. 102-103 °C; IR (KBr)  $\nu$  3399, 1678, 1646, 1626, 1416, 1235, 1205 cm<sup>-1</sup>; <sup>1</sup>H NMR (400MHz, CDCl<sub>3</sub>, TMS)  $\delta$  (ppm) 8.14 (s, 1H), 7.82 (d, *J* = 7.4Hz, 2H), 7.58-7.48 (m, 4H), 7.43-7.33 (m, 6H), 7.17 (t, *J* = 7.6 Hz, 1H), 7.07 (t, *J* = 7.6 Hz, 2H), 5.22 (s, 1H), 4.83 (s, 1H), 3.91 (t, *J* = 7.6 Hz, 2H), 3.10 (t, *J* = 7.6 Hz, 2H); <sup>13</sup>C NMR (100MHz, CDCl<sub>3</sub>, TMS)  $\delta$  (ppm) 190.4, 167.3, 145.8, 136.2, 134.7, 134.3, 134.0, 129.71, 129.67, 128.89, 128.86, 127.6, 127.4, 122.4, 122.2, 119.5, 118.8, 114.3, 112.3, 111.2, 45.1, 23.3; HRMS (ESI) Calcd. for C<sub>26</sub>H<sub>23</sub>N<sub>2</sub>O<sub>2</sub>, [M+H]<sup>+</sup> 395.1754. Found: 395.1751.

***N*-(2-(1*H*-indol-3-yl)ethyl)-*N*-(1-(4-bromophenyl)vinyl)-2-oxo-2-phenylacetamide (**1b**)**

White solid (66% yield, 2 steps). m.p. 144-146 °C; IR (KBr)  $\nu$  3431, 1678, 1648, 1628, 1421 cm<sup>-1</sup>; <sup>1</sup>H NMR (400MHz, CDCl<sub>3</sub>, TMS)  $\delta$  (ppm) 10.10 (s, 1H), 7.85 (d, *J* = 8.2 Hz, 2H), 7.67 (t, *J* = 7.3 Hz, 1H), 7.60 (d, *J* = 8.2 Hz, 2H), 7.54-7.49 (m, 5H), 7.42 (d, *J* = 7.8 Hz, 1H), 7.11 (t, *J* = 7.6 Hz, 1H), 7.00 (t, *J* = 7.6 Hz, 1H), 5.39 (s, 1H), 4.95 (s, 1H), 3.89 (t, *J* = 7.6 Hz, 2H), 3.13 (t, *J* = 7.6 Hz, 2H); <sup>13</sup>C NMR (100MHz, CDCl<sub>3</sub>, TMS)  $\delta$  (ppm) 191.2, 167.7, 145.6, 137.7, 135.15, 135.09, 134.8, 132.6, 130.2, 130.1, 129.8, 128.5, 123.9, 123.8, 122.2, 119.5, 119.3, 115.6, 112.2, 112.1, 45.7, 24.0; HRMS (ESI) Calcd. for C<sub>26</sub>H<sub>22</sub>N<sub>2</sub>O<sub>2</sub>Br, [M+H]<sup>+</sup> 473.0859. Found: 473.0858.

***N*-(2-(1*H*-indol-3-yl)ethyl)-*N*-(1-(4-fluorophenyl)vinyl)-2-oxo-2-phenylacetamide (**1c**)**

White solid (62% yield, 2 steps). m.p. 116-118 °C; IR (KBr)  $\nu$  3409, 3056, 2933, 1680, 1651, 1599, 1506  $\text{cm}^{-1}$ ;  $^1\text{H}$  NMR (400MHz, ACETONE- $\text{D}_6$ , TMS)  $\delta$  (ppm) 10.11 (s, 1H), 7.87-7.85 (m, 2H), 7.70-7.65 (m, 1H), 7.64-7.59 (m, 2H), 7.55-7.51 (m, 3H), 7.43-7.40 (m, 1H), 7.25-7.16 (m, 3H), 7.13-7.08 (m, 1H), 7.02-6.98 (m, 1H), 5.32 (s, 1H), 4.92 (s, 1H), 3.88 (t,  $J = 7.2$  Hz, 2H), 3.12 (t,  $J = 7.6$  Hz, 2H);  $^{19}\text{F}$  NMR (376MHz,  $\text{DMSO-}d_6$ )  $\delta$  (ppm) -113.41 (t,  $J = 6.0$  Hz);  $^{13}\text{C}$  NMR (100MHz, ACETONE- $\text{D}_6$ , TMS)  $\delta$  (ppm) 191.2, 167.7, 164.2 (d,  $J = 246$  Hz, 1C), 145.7, 137.6, 135.1, 134.9, 132.2 (d,  $J = 2.9$  Hz, 1C), 130.4 (d,  $J = 8.6$  Hz, 1C), 130.2, 129.7, 128.5, 123.8, 122.2, 119.5, 119.2, 116.3 (d,  $J = 21.9$  Hz, 1C), 114.8, 112.2, 112.1, 45.6, 24.0; HRMS (ESI) Calcd. for  $\text{C}_{26}\text{H}_{21}\text{N}_2\text{O}_2\text{FNa}$ ,  $[\text{M}+\text{Na}]^+$  435.1479. Found: 435.1477.

***N*-(2-(1*H*-indol-3-yl)ethyl)-*N*-(1-(4-chlorophenyl)vinyl)-2-oxo-2-phenylacetamide (1d)**

White solid (72% yield, 2 steps). m.p. 140-142 °C; IR (KBr)  $\nu$  3412, 2930, 1679, 1650, 1488, 1235, 1203  $\text{cm}^{-1}$ ;  $^1\text{H}$  NMR (400MHz, ACETONE- $\text{D}_6$ , TMS)  $\delta$  (ppm) 10.11 (s, 1H), 7.86-7.84 (m, 2H), 7.69-7.64 (m, 1H), 7.59-7.49 (m, 5H), 7.46-7.41 (m, 3H), 7.24 (d,  $J = 2.4$  Hz, 1H), 7.13-7.09 (m, 1H), 7.02-6.98 (m, 1H), 5.38 (s, 1H), 4.95 (s, 1H), 3.89 (t,  $J = 7.2$  Hz, 2H), 3.12 (t,  $J = 7.6$  Hz, 2H);  $^{13}\text{C}$  NMR (100MHz, ACETONE- $\text{D}_6$ , TMS)  $\delta$  (ppm) 191.2, 167.7, 145.4, 137.6, 135.6, 135.1, 134.8, 134.6, 130.2, 129.8, 129.7, 129.5, 128.5, 123.8, 122.2, 119.5, 119.2, 115.5, 112.2, 112.1, 45.7, 24.0; HRMS (ESI) Calcd. for  $\text{C}_{26}\text{H}_{21}\text{N}_2\text{O}_2\text{ClNa}$ ,  $[\text{M}+\text{Na}]^+$  451.1184. Found: 451.1186.

***N*-(2-(1*H*-indol-3-yl)ethyl)-*N*-(1-(4-nitrophenyl)vinyl)-2-oxo-2-phenylacetamide (1e)**

White solid (79% yield, 2 steps). m.p. 145-147 °C; IR (KBr)  $\nu$  3337, 3060, 2940, 1682, 1646, 1595, 1519, 1426  $\text{cm}^{-1}$ ;  $^1\text{H}$  NMR (400MHz,  $\text{CDCl}_3$ , TMS)  $\delta$  (ppm) 8.21-8.17 (m, 3H), 7.84-7.81 (m, 2H), 7.66-7.58 (m, 3H), 7.50 (d,  $J = 8.0$  Hz, 1H), 7.46-7.42 (m, 2H), 7.37 (d,  $J = 8.4$  Hz, 1H), 7.21-7.17 (m, 1H), 7.10-7.06 (m, 2H), 5.34 (d,  $J = 0.8$  Hz, 1H), 4.98 (d,  $J = 0.8$  Hz, 1H), 3.90 (t,  $J = 7.2$  Hz, 2H), 3.13 (t,  $J = 7.2$  Hz, 2H);  $^{13}\text{C}$  NMR (100MHz, ACETONE- $\text{D}_6$ , TMS)  $\delta$  (ppm) 191.2, 167.6,

149.1, 144.8, 142.1, 137.6, 135.3, 134.6, 130.3, 129.8, 129.2, 128.5, 124.5, 123.9, 122.2, 119.5, 119.2, 118.4, 112.2, 112.0, 45.9, 24.0; HRMS (ESI) Calcd. for  $C_{26}H_{21}N_3O_4Na$ ,  $[M+Na]^+$  462.1424. Found: 462.1423.

***N*-(2-(1*H*-indol-3-yl)ethyl)-*N*-(1-(3-bromophenyl)vinyl)-2-oxo-2-phenylacetamide (1f)**

White solid (59% yield, 2 steps). m.p. 155-157 °C; IR (KBr)  $\nu$  3341, 1670, 1654, 1420, 1238, 1199  $cm^{-1}$ ;  $^1H$  NMR (400MHz,  $CDCl_3$ , TMS)  $\delta$  (ppm) 8.10 (s, 1H), 7.81 (d,  $J = 7.8$ Hz, 2H), 7.62-7.35 (m, 8H), 7.24 (t,  $J = 7.8$  Hz, 1H), 7.19 (t,  $J = 7.8$  Hz, 1H), 7.09 (t,  $J = 7.1$  Hz, 2H), 5.21 (s, 1H), 4.85 (s, 1H), 3.90 (t,  $J = 7.6$  Hz, 2H), 3.10 (t,  $J = 7.6$  Hz, 2H);  $^{13}C$  NMR (100MHz,  $CDCl_3$ , TMS)  $\delta$  (ppm) 190.3, 167.2, 144.6, 137.0, 136.3, 134.4, 133.8, 132.6, 130.38, 130.36, 129.6, 129.1, 128.9, 127.5, 126.0, 123.0, 122.5, 122.2, 119.6, 118.8, 115.3, 112.1, 111.3, 45.2, 23.3; HRMS (ESI) Calcd. for  $C_{26}H_{22}N_2O_2Br$ ,  $[M+H]^+$  473.0859. Found: 473.0854.

***N*-(2-(1*H*-indol-3-yl)ethyl)-*N*-(1-(3-methoxyphenyl)vinyl)-2-oxo-2-phenylacetamide (1g)**

White solid (46% yield, 2 steps). m.p. 109-111 °C; IR (KBr)  $\nu$  3345, 3047, 2947, 1674, 1651, 1597, 1425, 1237  $cm^{-1}$ ;  $^1H$  NMR (400MHz, ACETONE- $D_6$ , TMS)  $\delta$  (ppm) 10.08 (s, 1H), 7.85-7.83 (m, 2H), 7.66-7.63 (m, 1H), 7.50 (t,  $J = 7.6$  Hz, 3H), 7.40-7.29 (m, 2H), 7.22 (d,  $J = 2.4$  Hz, 1H), 7.14-7.04 (m, 3H), 7.00-6.91 (m, 2H), 5.33 (s, 1H), 4.91 (s, 1H), 3.88 (t,  $J = 7.6$  Hz, 2H), 3.10 (t,  $J = 8.0$  Hz, 2H);  $^{13}C$  NMR (100MHz, ACETONE- $D_6$ , TMS)  $\delta$  (ppm) 191.2, 167.7, 160.8, 146.4, 137.6, 137.3, 135.0, 134.9, 130.5, 130.2, 129.7, 128.5, 126.5, 123.7, 122.2, 120.4, 119.5, 119.3, 115.9, 114.9, 113.5, 112.2, 55.6, 45.7, 24.0; HRMS (ESI) Calcd. for  $C_{27}H_{24}N_2O_3Na$ ,  $[M+Na]^+$  447.1679. Found: 447.1676.

***N*-(2-(1*H*-indol-3-yl)ethyl)-2-(3-bromophenyl)-*N*-(1-(4-bromophenyl)vinyl)-2-oxoacetamide (1h)**

White solid (68% yield, 2 steps). m.p. 145-147 °C; IR (KBr)  $\nu$  3417, 1683, 1644, 1634, 1419, 1226, 1198  $cm^{-1}$ ;  $^1H$  NMR (400MHz,  $CDCl_3$ , TMS)  $\delta$  (ppm) 8.10 (s, 1H), 7.97 (s, 1H), 7.70 (d,  $J = 7.8$  Hz, 2H), 7.50 (t,  $J = 7.3$  Hz, 3H), 7.36 (t,  $J = 8.7$  Hz, 3H), 7.29 (t,  $J = 7.8$  Hz, 1H), 7.19 (t,  $J = 7.6$  Hz, 1H), 7.13-7.07 (m, 2H), 5.18 (s,

1H), 4.73 (s, 1H), 3.90 (t,  $J = 7.3$  Hz, 2H), 3.09 (t,  $J = 7.3$  Hz, 2H);  $^{13}\text{C}$  NMR (100MHz,  $\text{CDCl}_3$ , TMS)  $\delta$  (ppm) 188.8, 166.6, 144.9, 137.2, 136.3, 135.6, 133.6, 132.3, 132.1, 132.0, 130.5, 129.0, 128.2, 127.6, 124.1, 123.2, 122.3, 119.6, 118.8, 114.8, 112.1, 111.4, 45.0, 23.3; HRMS (ESI) Calcd. for  $\text{C}_{26}\text{H}_{21}\text{N}_2\text{O}_2\text{Br}_2$ ,  $[\text{M}+\text{H}]^+$  552.9944. Found: 552.9941.

***N*-(2-(1*H*-indol-3-yl)ethyl)-2-(4-bromophenyl)-*N*-(1-(4-bromophenyl)vinyl)-2-oxoacetamide (1i)**

White solid (66% yield, 2 steps). m.p. 159-160 °C; IR (KBr)  $\nu$  3344, 1687, 1650, 1582, 1397, 1220, 1203  $\text{cm}^{-1}$ ;  $^1\text{H}$  NMR (400MHz,  $\text{CDCl}_3$ , TMS)  $\delta$  (ppm) 8.10 (s, 1H), 7.62 (d,  $J = 8.7$  Hz, 2H), 7.55-7.50 (m, 5H), 7.38-7.35 (m, 3H), 7.20 (t,  $J = 7.6$  Hz, 1H), 7.11-7.08 (m, 2H), 5.20 (s, 1H), 4.76 (s, 1H), 3.88 (t,  $J = 7.3$  Hz, 2H), 3.08 (t,  $J = 7.4$  Hz, 2H);  $^{13}\text{C}$  NMR (100MHz,  $\text{CDCl}_3$ , TMS)  $\delta$  (ppm) 189.2, 166.8, 145.0, 136.2, 133.6, 132.7, 132.3, 132.1, 131.0, 129.8, 129.0, 127.5, 124.1, 122.5, 122.4, 119.7, 118.8, 114.7, 112.1, 111.3, 45.1, 23.3; HRMS (ESI) Calcd. For  $\text{C}_{26}\text{H}_{21}\text{N}_2\text{O}_2\text{Br}_2$ ,  $[\text{M}+\text{H}]^+$  552.9944. Found: 552.9942.

***N*-(2-(1*H*-indol-3-yl)ethyl)-*N*-(1-(4-bromophenyl)vinyl)-2-oxo-2-(*p*-tolyl)acetamide (1j)**

White solid (54% yield, 2 steps). m.p. 173-175 °C; IR (KBr)  $\nu$  3347, 1680, 1647, 1635, 1603, 1425, 1225  $\text{cm}^{-1}$ ;  $^1\text{H}$  NMR (400MHz,  $\text{CDCl}_3$ , TMS)  $\delta$  (ppm) 10.10 (s, 1H), 7.75 (d,  $J = 8.2$  Hz, 2H), 7.61-7.58 (m, 2H), 7.51 (t,  $J = 8.7$  Hz, 3H), 7.41 (d,  $J = 8.2$  Hz, 1H), 7.33 (d,  $J = 8.2$  Hz, 2H), 7.24 (d,  $J = 2.3$  Hz, 1H), 7.10 (t,  $J = 7.3$  Hz, 1H), 7.00 (t,  $J = 7.3$  Hz, 1H), 5.38 (s, 1H), 4.95 (s, 1H), 3.87 (t,  $J = 7.6$  Hz, 2H), 3.11 (t,  $J = 7.6$  Hz, 2H), 2.41 (s, 3H);  $^{13}\text{C}$  NMR (100MHz,  $\text{CDCl}_3$ , TMS)  $\delta$  (ppm) 190.9, 167.9, 146.2, 145.6, 137.7, 135.2, 132.6, 132.5, 130.4, 130.1, 128.5, 123.9, 123.8, 122.2, 119.5, 119.3, 115.6, 112.2, 112.1, 45.6, 24.0, 21.7; HRMS (ESI) Calcd. For  $\text{C}_{27}\text{H}_{24}\text{N}_2\text{O}_2\text{Br}$ ,  $[\text{M}+\text{H}]^+$  487.1016. Found: 487.1013.

***N*-(1-(4-bromophenyl)vinyl)-*N*-(2-(5-chloro-1*H*-indol-3-yl)ethyl)-2-oxo-2-phenylacetamide (1k)**

White solid (62% yield, 2 steps). m.p. 158-159 °C; IR (KBr)  $\nu$  3420, 1686, 1632, 1448, 1424, 1230, 1204  $\text{cm}^{-1}$ ;  $^1\text{H}$  NMR (400MHz,  $\text{CDCl}_3$ , TMS)  $\delta$  (ppm) 8.19 (s,

1H), 7.83 (d,  $J = 6.9$  Hz, 2H), 7.59 (t,  $J = 7.3$  Hz, 1H), 7.51 (d,  $J = 8.2$  Hz, 2H), 7.46-7.36 (m, 5H), 7.27-7.25 (m, 1H), 7.14 (d,  $J = 1.8$  Hz, 1H), 7.12-7.11 (m, 1H), 5.18 (s, 1H), 4.80 (s, 1H), 3.85 (t,  $J = 7.6$  Hz, 2H), 3.05 (t,  $J = 7.6$  Hz, 2H);  $^{13}\text{C}$  NMR (100MHz,  $\text{CDCl}_3$ , TMS)  $\delta$  (ppm) 190.3, 167.3, 145.0, 134.6, 134.5, 133.9, 133.6, 132.1, 129.7, 129.0, 128.7, 125.4, 124.2, 123.8, 122.6, 118.3, 114.7, 112.3, 112.1, 45.0, 23.2; HRMS (ESI) Calcd. For  $\text{C}_{26}\text{H}_{21}\text{N}_2\text{O}_2\text{ClBr}$ ,  $[\text{M}+\text{H}]^+$  507.0469. Found: 507.0466.

***N*-(1-(4-bromophenyl)vinyl)-*N*-(2-(5-methyl-1*H*-indol-3-yl)ethyl)-2-oxo-2-phenylacetamide (1l)**

White solid (70% yield, 2 steps). m.p. 133-135 °C; IR (KBr)  $\nu$  3430, 2942, 1687, 1633, 1424, 1232  $\text{cm}^{-1}$ ;  $^1\text{H}$  NMR (400MHz, ACETONE- $\text{D}_6$ , TMS)  $\delta$  (ppm) 9.95 (s, 1H), 7.89-7.87 (m, 2H), 7.70-7.66 (m, 1H), 7.62-7.59 (m, 2H), 7.56-7.49 (m, 4H), 7.28 (d,  $J = 8.4$  Hz, 1H), 7.21-7.18 (m, 2H), 6.94-6.92 (m, 1H), 5.37 (s, 1H), 4.96 (s, 1H), 3.86 (t,  $J = 8.0$  Hz, 2H), 3.09 (t,  $J = 7.6$  Hz, 2H), 2.36 (s, 1H);  $^{13}\text{C}$  NMR (100MHz,  $\text{CDCl}_3$ , TMS)  $\delta$  (ppm) 191.2, 167.7, 145.6, 136.0, 135.1, 134.8, 132.6, 130.2, 130.1, 129.7, 128.7, 128.2, 123.9, 123.86, 123.80, 118.8, 115.4, 111.9, 111.5, 45.6, 24.0, 21.6; HRMS (ESI) Calcd. For  $\text{C}_{27}\text{H}_{23}\text{N}_2\text{O}_2\text{BrNa}$ ,  $[\text{M}+\text{Na}]^+$  509.0835. Found: 509.0834.

***N*-(1-(4-bromophenyl)vinyl)-*N*-(2-(5-methoxy-1*H*-indol-3-yl)ethyl)-2-oxo-2-phenylacetamide (1m)**

White solid (77% yield, 2 steps). m.p. 143-144 °C; IR (KBr)  $\nu$  3308, 1683, 1640, 1626, 1488, 1218, 1207  $\text{cm}^{-1}$ ;  $^1\text{H}$  NMR (400MHz,  $\text{CDCl}_3$ , TMS)  $\delta$  (ppm) 8.04 (s, 1H), 7.84 (d,  $J = 8.7$  Hz, 2H), 7.58 (t,  $J = 7.4$  Hz, 1H), 7.49 (d,  $J = 6.9$  Hz, 2H), 7.43 (t,  $J = 7.8$  Hz, 2H), 7.36 (d,  $J = 6.9$  Hz, 2H), 7.23 (d,  $J = 8.7$  Hz, 1H), 7.04 (d,  $J = 2.3$  Hz, 1H), 6.90 (d,  $J = 2.3$  Hz, 1H), 6.85-6.83 (m, 1H), 5.20 (s, 1H), 4.85 (s, 1H), 3.87 (t,  $J = 7.8$  Hz, 2H), 3.78 (s, 3H), 3.06 (t,  $J = 7.6$  Hz, 2H);  $^{13}\text{C}$  NMR (100MHz,  $\text{CDCl}_3$ , TMS)  $\delta$  (ppm) 190.4, 167.3, 154.1, 145.0, 134.5, 133.9, 133.7, 132.0, 131.4, 129.7, 128.99, 128.97, 127.9, 124.0, 123.2, 114.7, 112.6, 112.1, 111.8, 100.4, 56.0, 45.0, 23.5; HRMS (ESI) Calcd. For  $\text{C}_{27}\text{H}_{24}\text{N}_2\text{O}_3\text{Br}$ ,  $[\text{M}+\text{H}]^+$  503.0965. Found: 503.0962.



### 3. Lewis Acid-Catalyzed Reaction of **1**

#### 3.1 Optimization of Reaction Conditions

**Table S1.** Lewis acid catalyzed reaction of **1b**

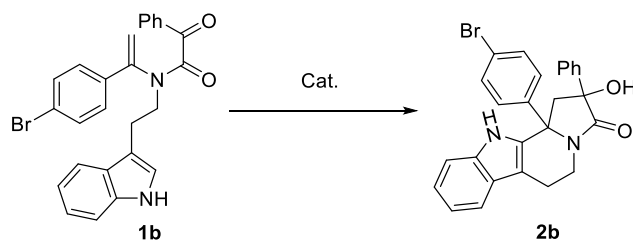

| Entry | Cat. (equiv)                 | solvent            | T (°C) | t (h) | yield(%) <sup>b</sup> |
|-------|------------------------------|--------------------|--------|-------|-----------------------|
| 1     | Cu(OTf) <sub>2</sub> (0.2)   | DCM                | rt     | 0.5   | 69                    |
| 2     | Sn(OTf) <sub>2</sub> (0.2)   | DCM                | rt     | 0.5   | 91                    |
| 3     | Zn(OTf) <sub>2</sub> (0.2)   | DCM                | rt     | 0.5   | 98                    |
| 4     | Sc(OTf) <sub>3</sub> (0.2)   | DCM                | rt     | 0.5   | 99                    |
| 5     | Sc(OTf) <sub>3</sub> (0.2)   | CHCl <sub>3</sub>  | rt     | 0.5   | 86                    |
| 6     | Sc(OTf) <sub>3</sub> (0.2)   | CH <sub>3</sub> CN | rt     | 0.5   | 96                    |
| 7     | Sc(OTf) <sub>3</sub> (0.2)   | Toluene            | rt     | 0.5   | 99                    |
| 8     | Sc(OTf) <sub>3</sub> (0.05)  | DCM                | rt     | 0.5   | 97                    |
| 9     | Sc(OTf) <sub>3</sub> (0.02)  | DCM                | rt     | 0.5   | 98                    |
| 10    | Sc(OTf) <sub>3</sub> (0.004) | DCM                | rt     | 2     | 84                    |
| 11    | Sc(OTf) <sub>3</sub> (0.001) | DCM                | rt     | 24    | mess                  |
| 12    | --                           | DCM                | rt     | 24    | mess                  |

<sup>a</sup> A mixture of **1** (0.5 mmol) and catalyst in dry solvent (5 mL) was stirred under argon protection. <sup>b</sup> Isolated yield.

#### 3.2 Synthesis of Racemic Products **2**

**Table S2.** Lewis Acid Catalyzed Reaction of **1**

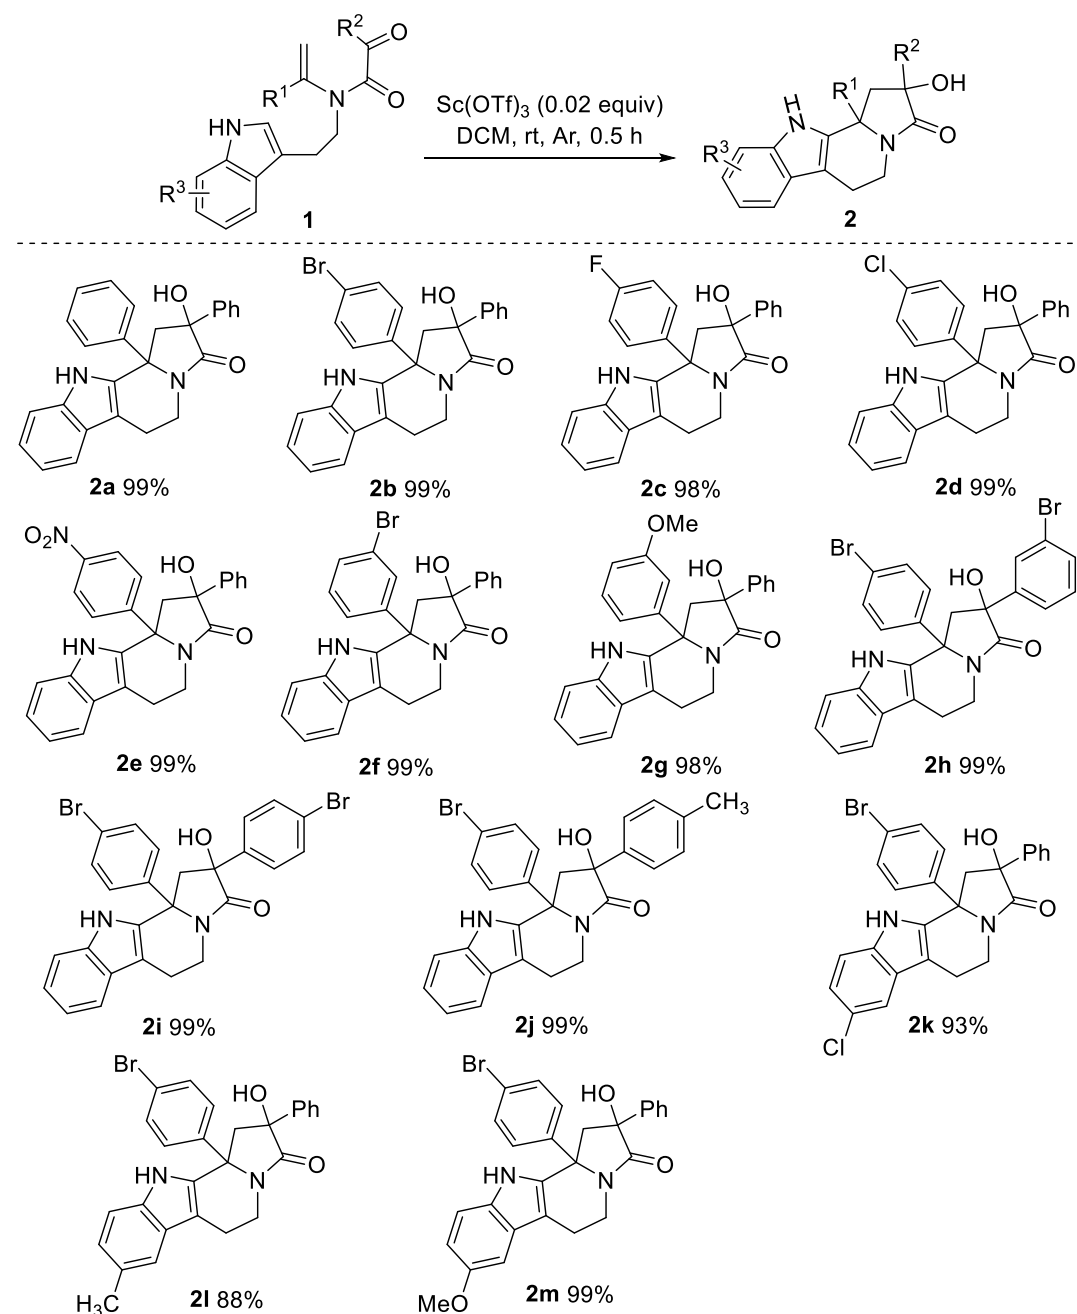

### 3.3 General Procedure for the Synthesis of Racemic Products 2

To a flask (10 mL) equipped with a magnetic stirrer was added **1** (0.5 mmol), Sc(OTf)<sub>3</sub> catalyst (2 mol%) and dry CH<sub>2</sub>Cl<sub>2</sub> (5 mL) under argon protection. The reaction mixture was stirred at room temperature for 0.5 h and then saturated NaHCO<sub>3</sub> aqueous solution (10 mL) was added to quench the reaction. The mixture was extracted with DCM (3×10 mL), and combined organic layer was washed with brine (2×20 mL) and dried over anhydrous Na<sub>2</sub>SO<sub>4</sub>. The solvents were removed in *vacuo*

and the residue was purified by flash column chromatography (PE:EA = 2:1) to afford products **2**.

#### 4. Optimization of Catalytic Enantioselective Reaction Conditions

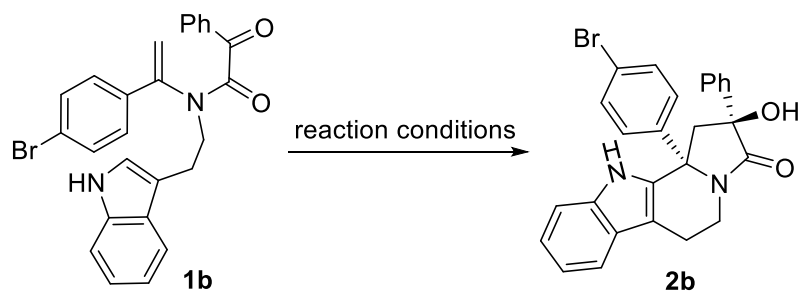

**Table S3.** Optimization of the reaction catalyzed by different chiral catalyst

| Entry | Cat.<br>(0.2 equiv)              | Solvent | T<br>(°C) | t<br>(h) | yield <sup>[b]</sup><br>(%) | ee <sup>[c]</sup><br>(%) |
|-------|----------------------------------|---------|-----------|----------|-----------------------------|--------------------------|
| 1     | <b>Cat-1</b>                     | DCM     | 35        | 2        | 95                          | 9                        |
| 2     | <b>Cat-2</b>                     | DCM     | 35        | 2        | 98                          | 83                       |
| 3     | <b>Cat-3</b>                     | DCM     | 35        | 10       | 76                          | 58                       |
| 4     | <b>Cat-4</b>                     | DCM     | 35        | 12       | mess                        | n.d. <sup>[d]</sup>      |
| 5     | <b>L1</b> /Ti(OiPr) <sub>4</sub> | DCM     | 35        | 2        | 72                          | 45                       |
| 6     | <b>L2</b> /Cu(OTf) <sub>2</sub>  | DCM     | 35        | 4        | 88                          | -82                      |
| 7     | <b>L3</b> /Cu(OTf) <sub>2</sub>  | DCM     | 35        | 48       | n.d. <sup>[d]</sup>         | 0                        |
| 8     | <b>L4</b> /Cu(OTf) <sub>2</sub>  | DCM     | 35        | 48       | n.d. <sup>[d]</sup>         | -55                      |
| 9     | <b>L5</b> /Cu(OTf) <sub>2</sub>  | DCM     | 35        | 2        | 94                          | 86                       |
| 10    | <b>L6</b> /Cu(OTf) <sub>2</sub>  | DCM     | 35        | 12       | n.d. <sup>[d]</sup>         | 6                        |
| 11    | <b>L7</b> /Cu(OTf) <sub>2</sub>  | DCM     | 35        | 10       | 83                          | 80                       |

<sup>a</sup> A mixture of **1b** (0.2 mmol) and catalyst (20 mol%) in dry solvent (5 mL) was stirred at 35 °C under argon protection. <sup>b</sup> Isolated yield. <sup>c</sup> Measured by chiral-phase HPLC. <sup>d</sup> Not determined.

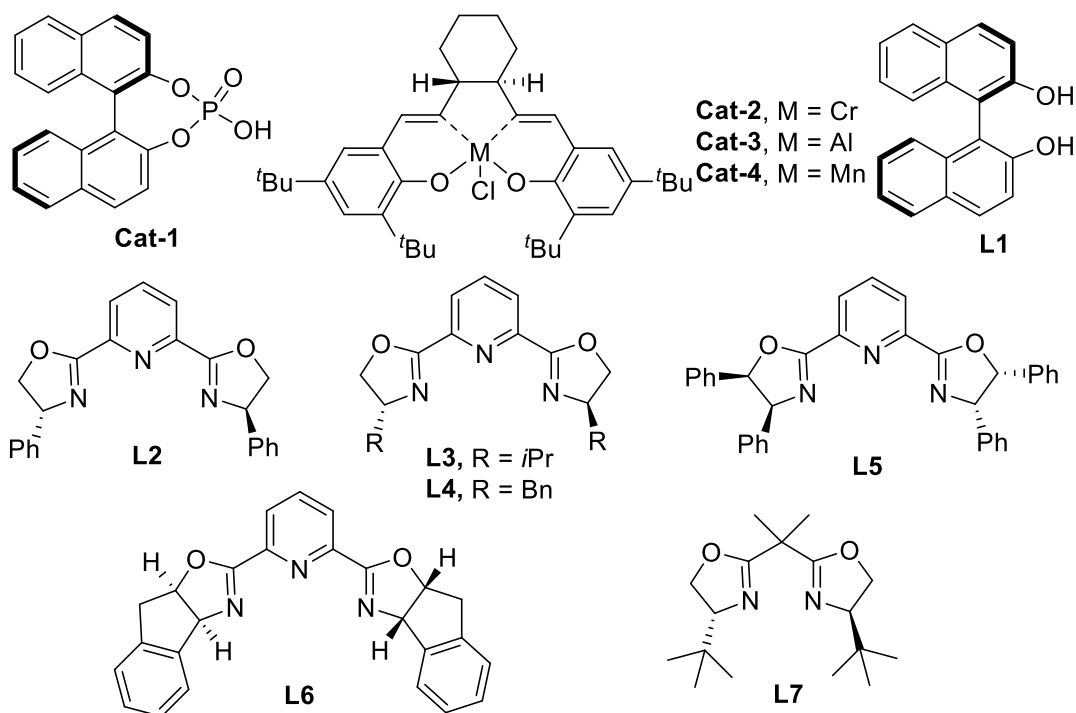

**Figure S1.** The structure of chiral catalyst

**Table S4.** Optimization of reaction temperature, solvent, and additive

| Entry | Cat.<br>(0.2 equiv)             | Additive<br>(2.0 equiv) | Solvent | T<br>(°C) | t<br>(h) | yield <sup>[b]</sup><br>(%) | ee <sup>[c]</sup><br>(%) |
|-------|---------------------------------|-------------------------|---------|-----------|----------|-----------------------------|--------------------------|
| 1     | <b>L5</b> /Cu(OTf) <sub>2</sub> | --                      | DCM     | rt        | 10       | 83                          | 80                       |
| 2     | <b>L5</b> /Cu(OTf) <sub>2</sub> | --                      | DCM     | 0         | 14       | 76                          | 77                       |
| 3     | <b>L5</b> /Cu(OTf) <sub>2</sub> | HFIP                    | DCM     | 35        | 2        | 90                          | 83                       |
| 4     | <b>L5</b> /Cu(OTf) <sub>2</sub> | --                      | toluene | rt        | 12       | 93                          | 84                       |
| 5     | <b>L5</b> /Cu(OTf) <sub>2</sub> | --                      | toluene | 35        | 10       | 90                          | 87                       |
| 6     | <b>L5</b> /Cu(OTf) <sub>2</sub> | --                      | toluene | 50        | 8        | 88                          | 89                       |
| 7     | <b>L5</b> /Cu(OTf) <sub>2</sub> | --                      | toluene | 65        | 3        | 86                          | 89                       |
| 8     | <b>L5</b> /Cu(OTf) <sub>2</sub> | --                      | toluene | 80        | 1        | 90                          | 87                       |

<sup>a</sup> A mixture of **1b** (0.2 mmol), catalyst (20 mol%) or additive in dry solvent (5 mL) was stirred at different temperature under argon protection.

<sup>b</sup> Isolated yield. <sup>c</sup> Measured by HPLC.

**Table S5.** Optimization of reaction temperature, solvent, and additive

| Entry | Cat.<br>(0.2 equiv)             | Additive<br>(equiv)                | Solvent  | T<br>(°C) | t<br>(h) | yield <sup>[b]</sup><br>(%) | ee <sup>[c]</sup><br>(%) |
|-------|---------------------------------|------------------------------------|----------|-----------|----------|-----------------------------|--------------------------|
| 1     | <b>L5</b> /Cu(OTf) <sub>2</sub> | --                                 | DCE      | 50        | 1        | 89                          | 76                       |
| 2     | <b>L5</b> /Cu(OTf) <sub>2</sub> | --                                 | p-Xylene | 50        | 10       | 89                          | 88                       |
| 3     | <b>L5</b> /Cu(OTf) <sub>2</sub> | --                                 | Benzene* | 50        | 10       | 88                          | 91                       |
| 4     | <b>L5</b> /Cu(OTf) <sub>2</sub> | H <sub>2</sub> O (1.0)             | Benzene  | 50        | 10       | 77                          | 89                       |
| 5     | <b>L5</b> /Cu(OTf) <sub>2</sub> | H <sub>2</sub> O (2.0)             | Benzene  | 50        | 10       | 76                          | 94                       |
| 6     | <b>L5</b> /Cu(OTf) <sub>2</sub> | Saturated<br>with H <sub>2</sub> O | Benzene  | 50        | 10       | 82                          | 97                       |
| 7     | <b>L5</b> /Cu(OTf) <sub>2</sub> | HFIP (2.0)                         | Benzene  | 50        | 6        | 80                          | 94                       |
| 8     | <b>L5</b> /Cu(OTf) <sub>2</sub> | --                                 | Benzene  | 50        | 10       | 88                          | 98                       |

<sup>a</sup> A mixture of **1b** (0.2 mmol), catalyst (20 mol%) or additive in dry solvent (5 mL) was stirred at different temperature under argon protection. <sup>b</sup> Isolated yield.

<sup>c</sup> Measured by HPLC.

## 5. Synthesis of Enantioenriched Pyrrolo[2,1-*a*]isoquinoline Derivatives

### 5.1. General procedure for catalytic enantioselective reaction of tertiary enamides

Under argon protection, a mixture of Cu(OTf)<sub>2</sub> (14.5 mg, 0.04 mmol) and 2,6-*bis*((4*R*,5*S*)-4,5-diphenyl-4,5-dihydrooxazol-2-yl)pyridine (21.0 mg, 0.04 mmol) in dry benzene (3 mL) was stirred at 50 °C for 2 h to give a light blue solution of Cu-Pybox complex. A solution of tertiary enamide **1** (0.2 mmol) in dry benzene (2 mL) was added through a syringe. After stirring for 10 h, the reaction was quenched by adding an aqueous NaHCO<sub>3</sub> solution (5%, 10 mL). The mixture was then extracted with CH<sub>2</sub>Cl<sub>2</sub> (3×10 mL), and combined organic layer was washed with brine (2 × 20 mL). The organic layer was dried over anhydrous Na<sub>2</sub>SO<sub>4</sub> and concentrated under vacuum. The residue was chromatographed on a silica gel column eluted with a mixture of petroleum ether and ethyl acetate (2:1) to give pure product **2**.

### 5.3 Characterization Data of Products

#### (2*S*,11*bS*)-2-hydroxy-2,11*b*-diphenyl-1,2,5,6,11,11*b*-hexahydro-3*H*-indolizino[8,7-*b*]indol-3-one (**2a**)

White solid (68 mg, 86% yield). m.p. 150-152 °C;  $[\alpha]_{25}^D = 112.7^\circ$  ( $c = 0.5$ ,  $\text{CHCl}_3$ ); ee = 97% (DAICEL Chiralpak AS-H, hexane/2-propanol = 70/30,  $\lambda = 254$  nm, flow rate = 0.5 mL/min); IR (KBr)  $\nu$  3297, 1679, 1655, 1445  $\text{cm}^{-1}$ ;  $^1\text{H}$  NMR (400MHz,  $\text{DMSO-}d_6$ , TMS)  $\delta$  (ppm) 11.45 (s, 1H), 7.44-7.39 (m, 4H), 7.34-7.23 (m, 8H), 7.13 (t,  $J = 7.6$  Hz, 1H), 7.01 (t,  $J = 7.3$  Hz, 1H), 6.03 (s, 1H), 4.31-4.28 (m, 1H), 3.16 (d,  $J = 14.2$  Hz, 1H), 3.04-2.98 (m, 1H), 2.95-2.88 (m, 1H), 2.76-2.67 (m, 2H);  $^{13}\text{C}$  NMR (100MHz,  $\text{DMSO-}d_6$ , TMS)  $\delta$  (ppm) 174.6, 144.0, 143.7, 136.3, 136.1, 128.6, 128.0, 127.4, 127.2, 126.3, 125.9, 125.8, 121.4, 118.8, 118.1, 111.3, 106.3, 78.2, 62.8, 51.8, 36.3, 19.9; HRMS (ESI) Calcd. for  $\text{C}_{26}\text{H}_{21}\text{N}_2\text{O}_2$ ,  $[\text{M-H}]^+$  393.1608. Found: 393.1602.

Chiral HPLC analysis of racemic **2a**.

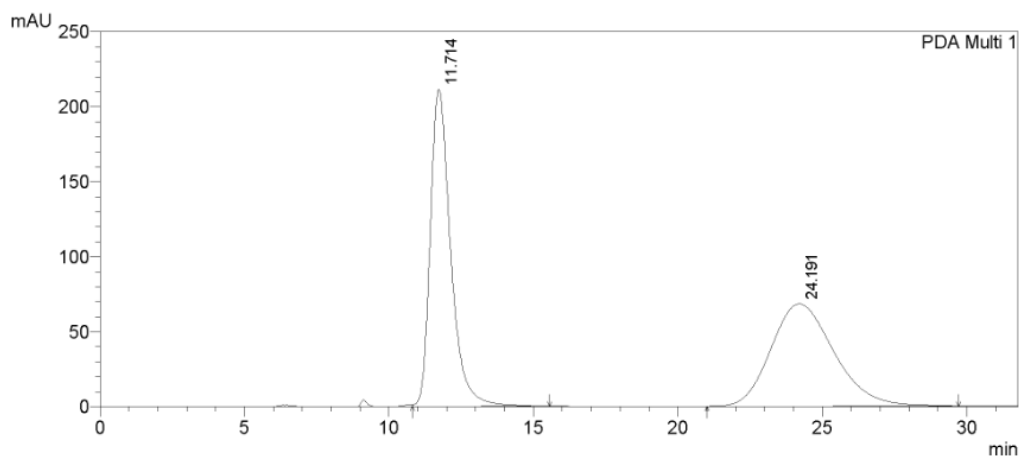

1 PDA Multi 1/254nm 4nm

PeakTable

| Peak# | Ret. Time | Area     | Height | Area %  | Height % |
|-------|-----------|----------|--------|---------|----------|
| 1     | 11.714    | 10352770 | 211176 | 50.015  | 75.581   |
| 2     | 24.191    | 10346369 | 68226  | 49.985  | 24.419   |
| Total |           | 20699139 | 279402 | 100.000 | 100.000  |

Chiral HPLC analysis of **2a** from asymmetric reaction.

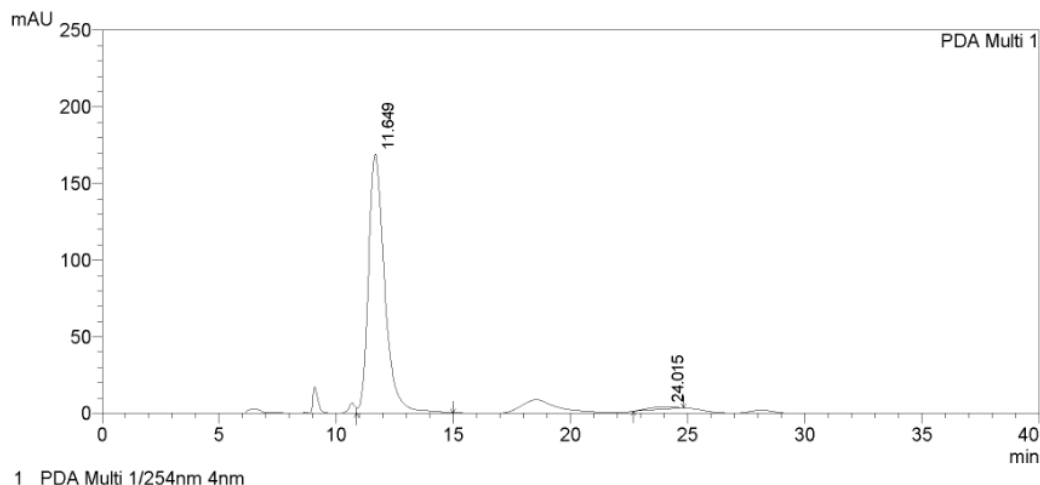

PeakTable

PDA Ch1 254nm 4nm

| Peak# | Ret. Time | Area    | Height | Area %  | Height % |
|-------|-----------|---------|--------|---------|----------|
| 1     | 11.649    | 8192379 | 169126 | 98.430  | 99.065   |
| 2     | 24.015    | 130688  | 1596   | 1.570   | 0.935    |
| Total |           | 8323068 | 170723 | 100.000 | 100.000  |

**(2*S*,11*bS*)-11*b*-(4-bromophenyl)-2-hydroxy-2-phenyl-1,2,5,6,11,11*b*-hexahydro-3-*H*-indolizino[8,7-*b*]indol-3-one (2*b*)**

White solid (83 mg, 88% yield). m.p. 161-162 °C;  $[\alpha]_{25}^D = 164.0^\circ$  ( $c = 0.5$ ,  $\text{CHCl}_3$ ); ee = 99% (DAICEL Chiralpak AS-H, hexane/2-propanol = 70/30,  $\lambda = 254$  nm, flow rate = 0.5 mL/min); IR (KBr)  $\nu$  3303, 1682, 1489, 1446, 1425, 1396  $\text{cm}^{-1}$ ;  $^1\text{H}$  NMR (400MHz,  $\text{DMSO-}d_6$ , TMS)  $\delta$  (ppm) 11.46 (s, 1H), 7.52 (d,  $J = 8.7$  Hz, 1H), 7.44-7.39 (m, 4H), 7.33 (t,  $J = 7.6$  Hz, 2H), 7.28-7.25 (m, 3H), 7.13 (t,  $J = 7.6$  Hz, 1H), 7.02 (t,  $J = 7.6$  Hz, 1H), 6.05 (s, 1H), 3.14 (d,  $J = 14.2$  Hz, 1H), 3.04-2.97 (m, 1H), 2.94-2.85 (m, 1H), 2.70 (d,  $J = 14.7$  Hz, 2H);  $^{13}\text{C}$  NMR (100MHz,  $\text{DMSO-}d_6$ , TMS)  $\delta$  (ppm) 174.7, 143.5, 143.4, 136.1, 135.7, 131.5, 128.2, 128.0, 127.3, 126.3, 125.8, 121.5, 120.7, 118.8, 118.1, 111.4, 106.5, 78.2, 62.5, 51.5, 36.3, 19.9; HRMS (ESI) Calcd. for  $\text{C}_{26}\text{H}_{20}\text{N}_2\text{O}_2\text{Br}$ ,  $[\text{M-H}]^+$  471.0713. Found: 471.0705.

Chiral HPLC analysis of racemic **2b**.

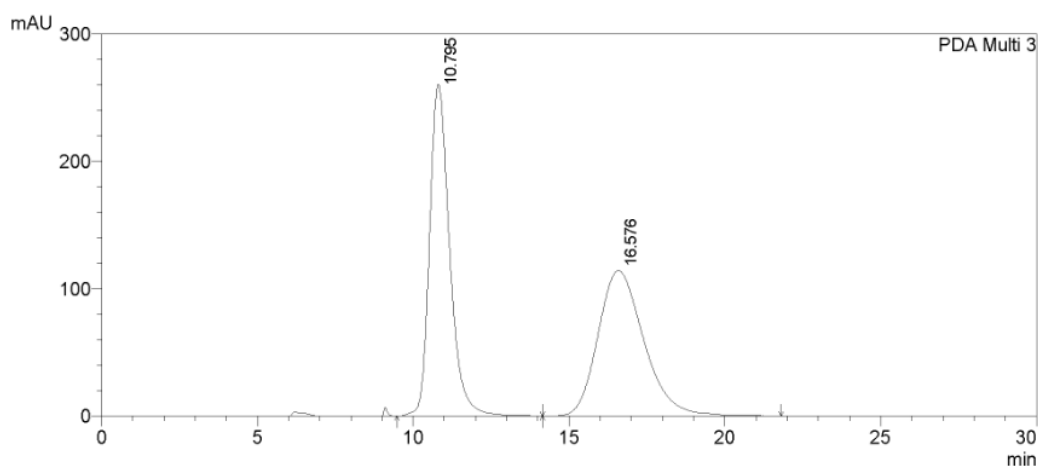

PeakTable

| PDA Ch3 280nm 4nm |           |          |        |         |          |
|-------------------|-----------|----------|--------|---------|----------|
| Peak#             | Ret. Time | Area     | Height | Area %  | Height % |
| 1                 | 10.795    | 11689112 | 260564 | 49.964  | 69.537   |
| 2                 | 16.576    | 11705805 | 114149 | 50.036  | 30.463   |
| Total             |           | 23394917 | 374713 | 100.000 | 100.000  |

Chiral HPLC analysis of **2b** from asymmetric reaction.

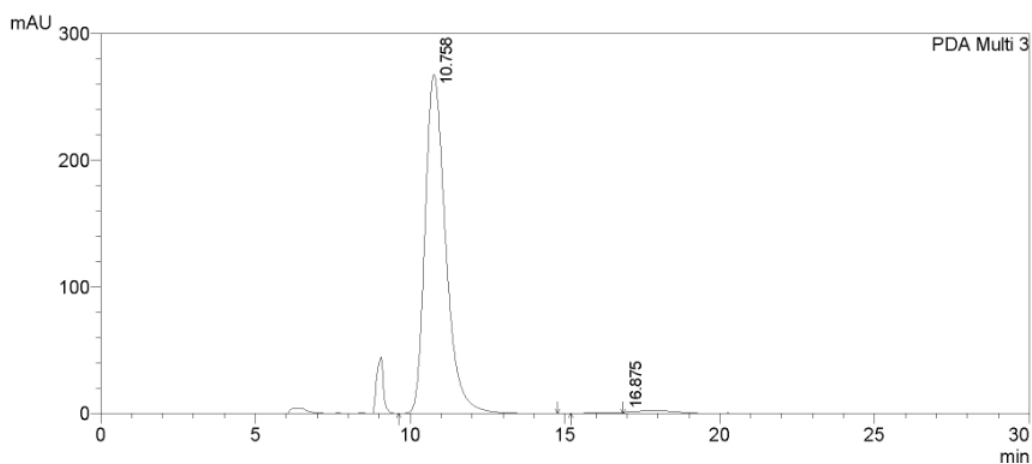

峰表

| PDA Ch3 280nm 4nm |        |          |        |         |         |
|-------------------|--------|----------|--------|---------|---------|
| 峰#                | 保留时间   | 面积       | 高度     | 面积 %    | 高度 %    |
| 1                 | 10.758 | 12434047 | 268042 | 99.470  | 99.616  |
| 2                 | 16.875 | 66192    | 1033   | 0.530   | 0.384   |
| Total             |        | 12500239 | 269075 | 100.000 | 100.000 |

**(2*S*,11*bS*)-11*b*-(4-fluorophenyl)-2-hydroxy-2-phenyl-1,2,5,6,11,11*b*-hexahydro-3*H*-indolizino[8,7-*b*]indol-3-one (2*c*)**

White solid (78 mg, 94% yield). m.p. 165-167 °C;  $[\alpha]_{25}^D = 109.3^\circ$  ( $c = 0.5$ ,  $\text{CHCl}_3$ ); ee = 97% (DAICEL Chiralpak AS-H, hexane/2-propanol = 70/30,  $\lambda = 254$  nm, flow rate = 0.5 mL/min); IR (KBr)  $\nu$  3290, 3053, 2940, 1653, 1509, 1446, 1233  $\text{cm}^{-1}$ ;  $^1\text{H}$  NMR (400MHz,  $\text{DMSO-}d_6$ , TMS)  $\delta$  (ppm) 11.45 (s, 1H), 7.44-7.39 (m, 4H), 7.35- 7.24 (m, 5H), 7.17-7.11 (m, 3H), 7.02 (t,  $J = 7.2$  Hz, 1H), 6.05 (d,  $J = 5.2$  Hz, 1H), 4.31-4.28



(m, 1H), 3.17-3.12 (m, 1H), 3.04-2.87 (m, 2H), 2.75-2.68 (m, 2H);  $^{19}\text{F}$  NMR (376MHz,  $\text{DMSO-}d_6$ )  $\delta$  (ppm) -115.12 (d,  $J = 0.54$  Hz);  $^{13}\text{C}$  NMR (100MHz,  $\text{DMSO-}d_6$ , TMS)  $\delta$  (ppm) 174.7, 161.2 (d,  $J = 243$  Hz, 1C), 143.6, 140.1, 136.1 (d,  $J = 4.8$  Hz, 1C), 128.1 (d,  $J = 8.6$  Hz, 1C), 128.0, 127.3, 126.3, 125.8, 121.5, 118.8, 118.1, 115.3 (d,  $J = 21.9$  Hz, 1C), 111.3, 106.4, 78.2, 62.4, 51.7, 36.2, 19.9; HRMS (ESI) Calcd. for  $\text{C}_{26}\text{H}_{21}\text{N}_2\text{O}_2\text{FNa}$ ,  $[\text{M}+\text{Na}]^+$  435.1479. Found: 435.1477.

Chiral HPLC analysis of racemic **2c**.

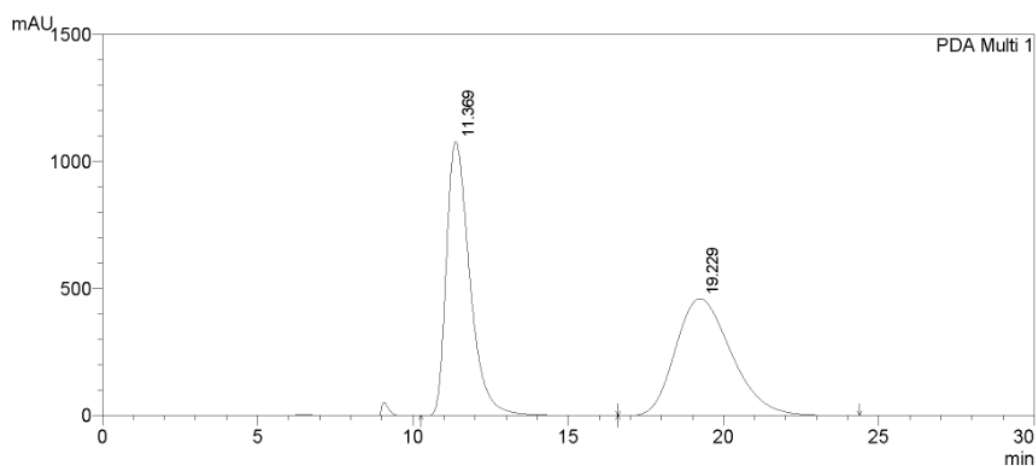

1 PDA Multi 1/254nm 4nm

PeakTable

PDA Ch1 254nm 4nm

| Peak# | Ret. Time | Area      | Height  | Area %  | Height % |
|-------|-----------|-----------|---------|---------|----------|
| 1     | 11.369    | 56939055  | 1080654 | 49.567  | 70.053   |
| 2     | 19.229    | 57934312  | 461978  | 50.433  | 29.947   |
| Total |           | 114873367 | 1542632 | 100.000 | 100.000  |

Chiral HPLC analysis of **2c** from asymmetric reaction.

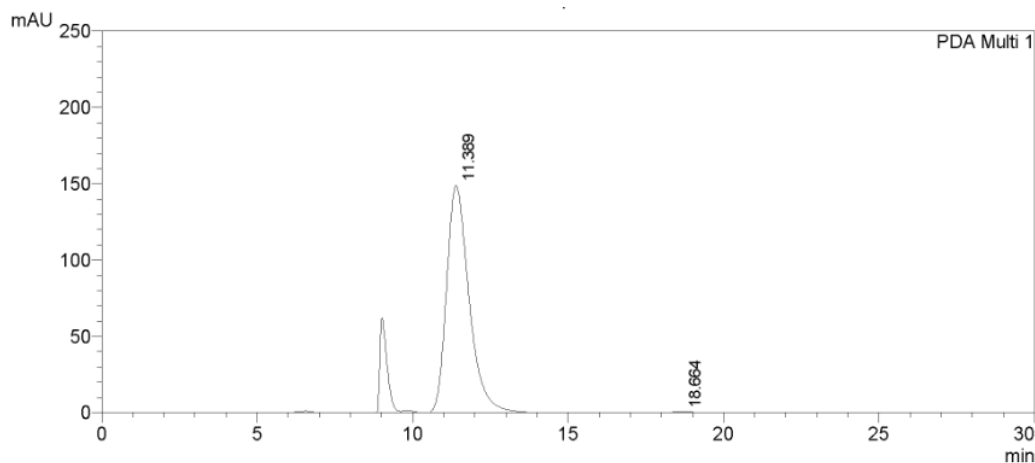

1 PDA Multi 1/254nm 4nm

PeakTable

PDA Ch1 254nm 4nm

| Peak# | Ret. Time | Area    | Height | Area %  | Height % |
|-------|-----------|---------|--------|---------|----------|
| 1     | 11.389    | 7707695 | 149690 | 98.420  | 99.148   |
| 2     | 18.664    | 123747  | 1286   | 1.580   | 0.852    |
| Total |           | 7831442 | 150976 | 100.000 | 100.000  |

**(2*S*,11*bS*)-11*b*-(4-chlorophenyl)-2-hydroxy-2-phenyl-1,2,5,6,11,11*b*-hexahydro-3-*H*-indolizino[8,7-*b*]indol-3-one (2*d*)**

White solid (79 mg, 92% yield). m.p. 161-163 °C;  $[\alpha]_{25}^D = 144.0^\circ$  ( $c = 0.5$ ,  $\text{CHCl}_3$ ); ee = 96% (DAICEL Chiralpak AS-H, hexane/2-propanol = 70/30,  $\lambda = 254$  nm, flow rate = 0.5 mL/min); IR (KBr)  $\nu$  3303, 3053, 2938, 2851, 1651, 1492, 1446, 1432  $\text{cm}^{-1}$ ;  $^1\text{H}$  NMR (400MHz,  $\text{CDCl}_3$ , TMS)  $\delta$  (ppm) 8.17 (s, 1H), 7.52 (d,  $J = 8.0$  Hz, 1H), 7.47-7.45 (m, 2H), 7.38- 7.29 (m, 4H), 7.25-7.21 (m, 1H), 7.19-7.14 (m, 3H), 7.04-7.01 (m, 2H), 4.46-4.41 (m, 1H), 3.19-3.00 (m, 3H), 2.97 (d,  $J = 14.0$  Hz, 1H), 2.78-2.73 (m, 1H);  $^{13}\text{C}$  NMR (100MHz,  $\text{CDCl}_3$ , TMS)  $\delta$  (ppm) 174.8, 142.5, 141.4, 136.4, 134.5, 134.2, 128.9, 128.4, 128.3, 126.8, 125.8, 122.9, 120.3, 118.9, 111.5, 109.5, 79.5, 63.1, 50.5, 36.6, 20.4; HRMS (ESI) Calcd. for  $\text{C}_{26}\text{H}_{21}\text{N}_2\text{O}_2\text{ClNa}$ ,  $[\text{M}+\text{Na}]^+$  451.1184. Found: 451.1183.

Chiral HPLC analysis of racemic **2d**.

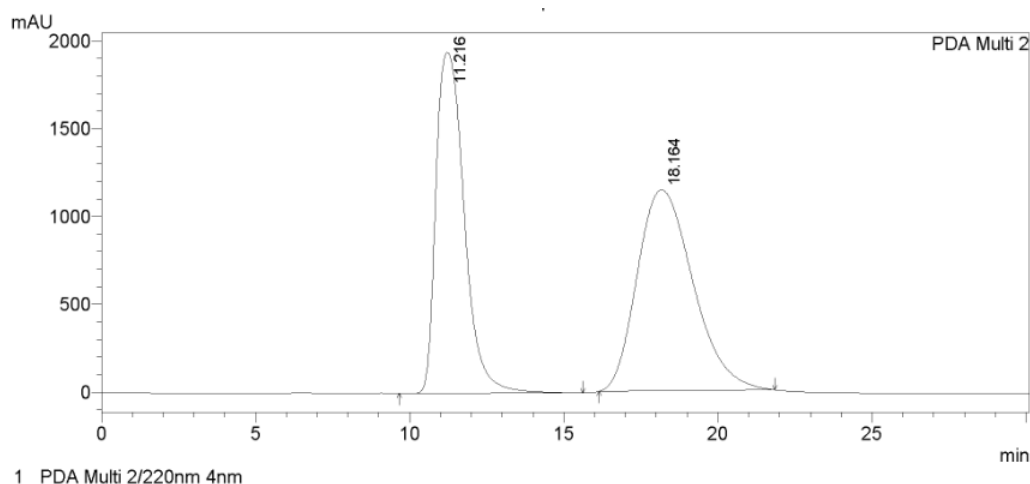

PeakTable

| Peak# | Ret. Time | Area      | Height  | Area %  | Height % |
|-------|-----------|-----------|---------|---------|----------|
| 1     | 11.216    | 124240103 | 1943274 | 46.205  | 62.909   |
| 2     | 18.164    | 144645931 | 1145767 | 53.795  | 37.091   |
| Total |           | 268886034 | 3089041 | 100.000 | 100.000  |

Chiral HPLC analysis of **2d** from asymmetric reaction.

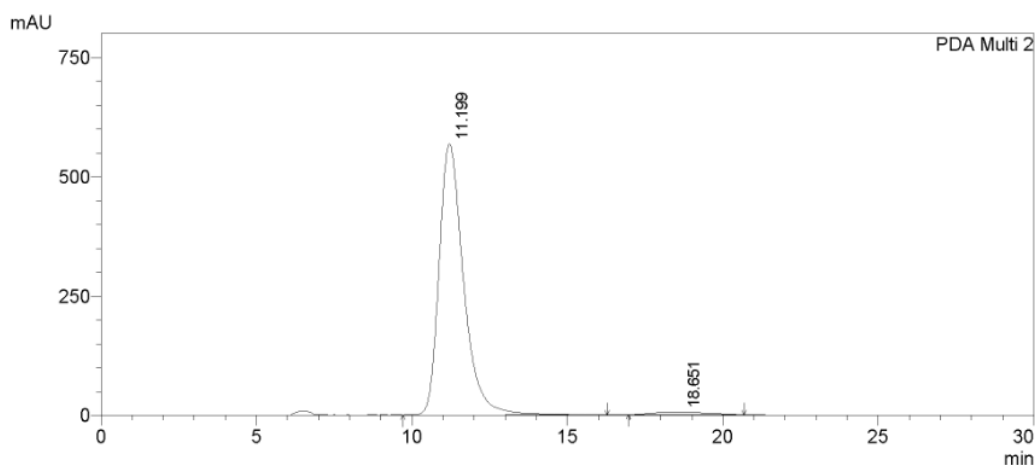

PeakTable

| Peak# | Ret. Time | Area     | Height | Area %  | Height % |
|-------|-----------|----------|--------|---------|----------|
| 1     | 11.199    | 31125337 | 567758 | 97.913  | 98.980   |
| 2     | 18.651    | 663327   | 5853   | 2.087   | 1.020    |
| Total |           | 31788664 | 573611 | 100.000 | 100.000  |

**(2*S*,11*bS*)-2-hydroxy-11*b*-(4-nitrophenyl)-2-phenyl-1,2,5,6,11,11*b*-hexahydro-3*H*-indolizino[8,7-*b*]indol-3-one (2*e*)**

White solid (63 mg, 71% yield). m.p. 182-183 °C;  $[\alpha]_{25}^D = 64.7^\circ$  ( $c = 0.5$ ,  $\text{CHCl}_3$ ); ee = 99% (DAICEL Chiralpak AS-H, hexane/2-propanol = 70/30,  $\lambda = 254$  nm, flow rate = 0.5 mL/min); IR (KBr)  $\nu$  3304, 3059, 1683, 1520, 1350  $\text{cm}^{-1}$ ;  $^1\text{H}$  NMR (400MHz,  $\text{DMSO-}d_6$ , TMS)  $\delta$  (ppm) 11.59 (s, 1H), 8.18 (d,  $J = 8.4$  Hz, 2H), 7.66 (d,  $J = 8.8$  Hz, 2H), 7.46-7.40 (m, 4H), 7.32 (t,  $J = 7.6$  Hz, 2H), 7.27-7.23 (m, 1H), 7.18-7.14 (m, 1H), 7.03 (t,  $J = 7.2$  Hz, 1H), 6.15 (s, 1H), 4.41-4.36 (m, 1H), 3.20 (d,  $J = 14.0$  Hz, 1H), 3.10-3.02 (m, 1H), 2.96-2.88 (m, 1H), 2.77-2.69 (m, 2H);  $^{13}\text{C}$  NMR (100MHz,  $\text{DMSO-}d_6$ , TMS)  $\delta$  (ppm) 174.8, 151.1, 146.6, 143.1, 136.3, 134.9, 128.0, 127.4, 127.3, 126.2, 125.8, 123.8, 121.7, 119.0, 118.2, 111.5, 106.9, 78.1, 62.7, 51.3, 36.5, 19.8; HRMS (ESI) Calcd. for  $\text{C}_{26}\text{H}_{21}\text{N}_3\text{O}_4\text{Na}$ ,  $[\text{M}+\text{Na}]^+$  462.1424. Found: 462.1423.

Chiral HPLC analysis of racemic **2e**.

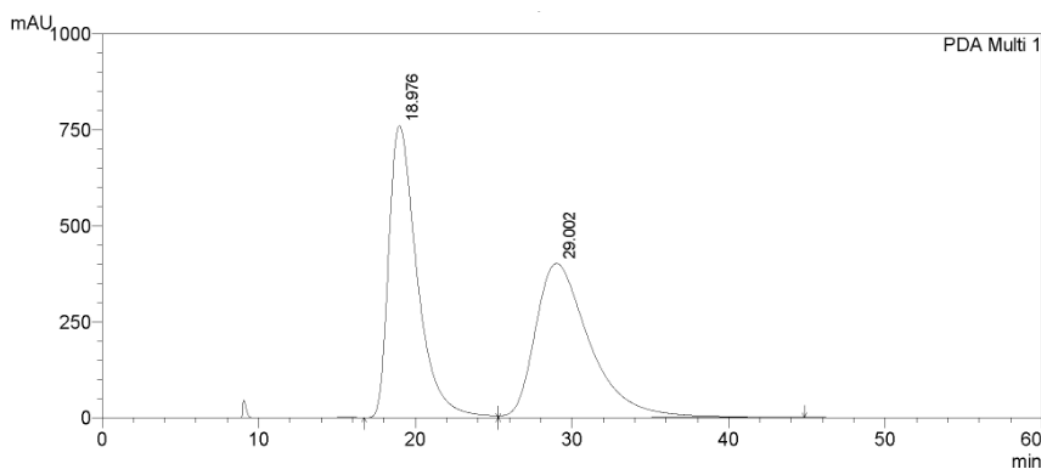

1 PDA Multi 1/254nm 4nm

PeakTable

PDA Ch1 254nm 4nm

| Peak# | Ret. Time | Area      | Height  | Area %  | Height % |
|-------|-----------|-----------|---------|---------|----------|
| 1     | 18.976    | 95658997  | 761239  | 49.618  | 65.469   |
| 2     | 29.002    | 97132798  | 401510  | 50.382  | 34.531   |
| Total |           | 192791795 | 1162749 | 100.000 | 100.000  |

Chiral HPLC analysis of **2e** from asymmetric reaction.

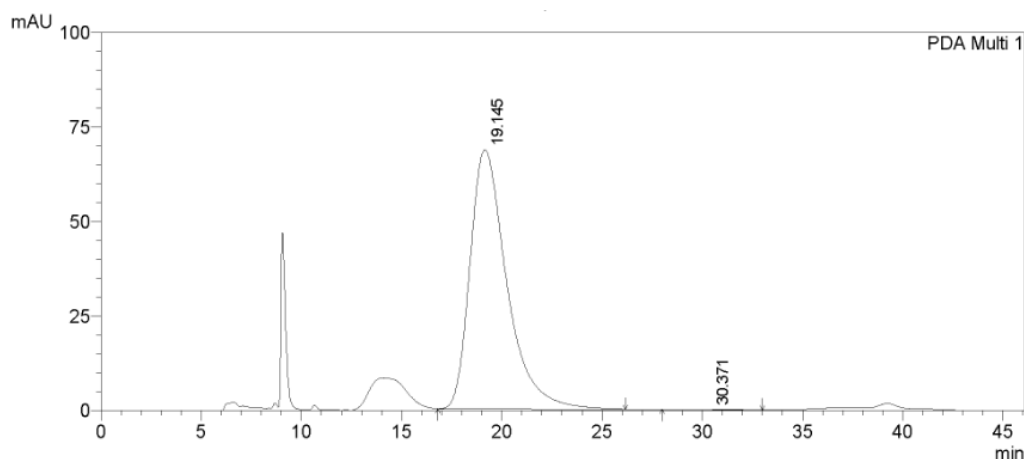

1 PDA Multi 1/254nm 4nm

PeakTable

PDA Ch1 254nm 4nm

| Peak# | Ret. Time | Area    | Height | Area %  | Height % |
|-------|-----------|---------|--------|---------|----------|
| 1     | 19.145    | 8742255 | 68601  | 99.654  | 99.739   |
| 2     | 30.371    | 30371   | 179    | 0.346   | 0.261    |
| Total |           | 8772626 | 68781  | 100.000 | 100.000  |

**(2*S*,11*bS*)-11*b*-(3-bromophenyl)-2-hydroxy-2-phenyl-1,2,5,6,11,11*b*-hexahydro-3-*H*-indolino[8,7-*b*]indol-3-one (**2f**)**

White solid (82 mg, 86% yield). m.p. 143-146 °C;  $[\alpha]_{25}^D = 115.3^\circ$  ( $c = 0.5$ ,  $\text{CHCl}_3$ ); ee = 99% (DAICEL Chiralpak AS-H, hexane/2-propanol = 70/30,  $\lambda = 254$  nm, flow rate = 0.5 mL/min); IR (KBr)  $\nu$  3301, 1681, 1661, 1446, 1418  $\text{cm}^{-1}$ ;  $^1\text{H}$  NMR (400MHz,  $\text{DMSO-}d_6$ , TMS)  $\delta$  (ppm) 11.50 (s, 1H), 7.47-7.24 (m, 11H), 7.14 (t,  $J = 7.8$  Hz, 1H), 7.03 (t,  $J = 7.6$  Hz, 1H), 6.08 (s, 1H), 4.35-4.32 (m, 1H), 3.12 (d,  $J = 13.8$  Hz, 1H),

3.07-3.00 (m, 1H), 2.94-2.85 (m, 1H), 2.76-2.70 (m, 2H); <sup>13</sup>C NMR (100MHz, DMSO-*d*<sub>6</sub>, TMS) δ (ppm) 174.3, 146.2, 143.0, 135.9, 135.2, 130.6, 130.1, 128.5, 127.7, 127.1, 125.9, 125.6, 124.6, 121.6, 121.3, 118.6, 117.9, 111.1, 106.3, 77.8, 62.1, 51.2, 36.0, 19.6; HRMS (ESI) Calcd. for C<sub>26</sub>H<sub>20</sub>N<sub>2</sub>O<sub>2</sub>Br, [M-H]<sup>+</sup> 473.0688. Found: 473.0684.

Chiral HPLC analysis of racemic **2f**.

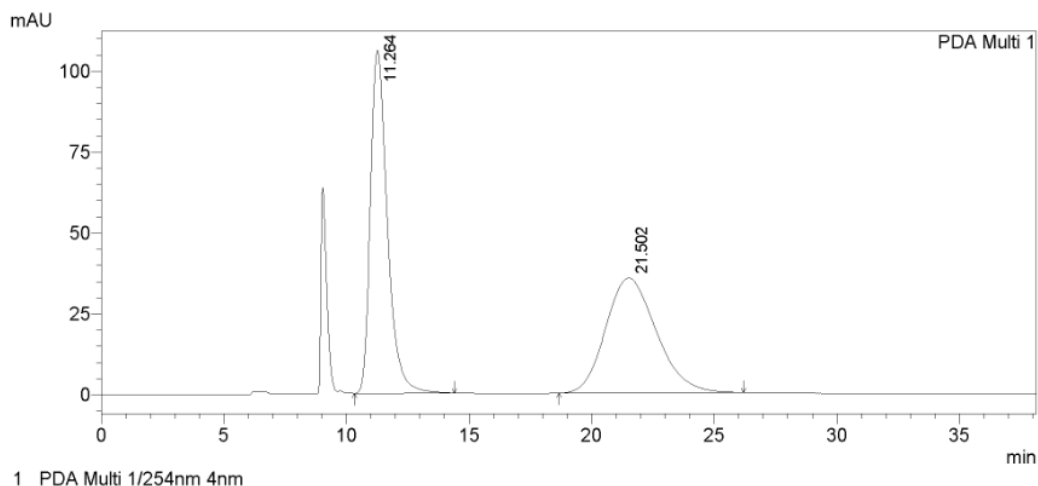

PeakTable

| Peak# | Ret. Time | Area     | Height | Area %  | Height % |
|-------|-----------|----------|--------|---------|----------|
| 1     | 11.264    | 5069283  | 105850 | 49.855  | 74.901   |
| 2     | 21.502    | 5098678  | 35469  | 50.145  | 25.099   |
| Total |           | 10167961 | 141319 | 100.000 | 100.000  |

Chiral HPLC analysis of **2f** from asymmetric reaction.

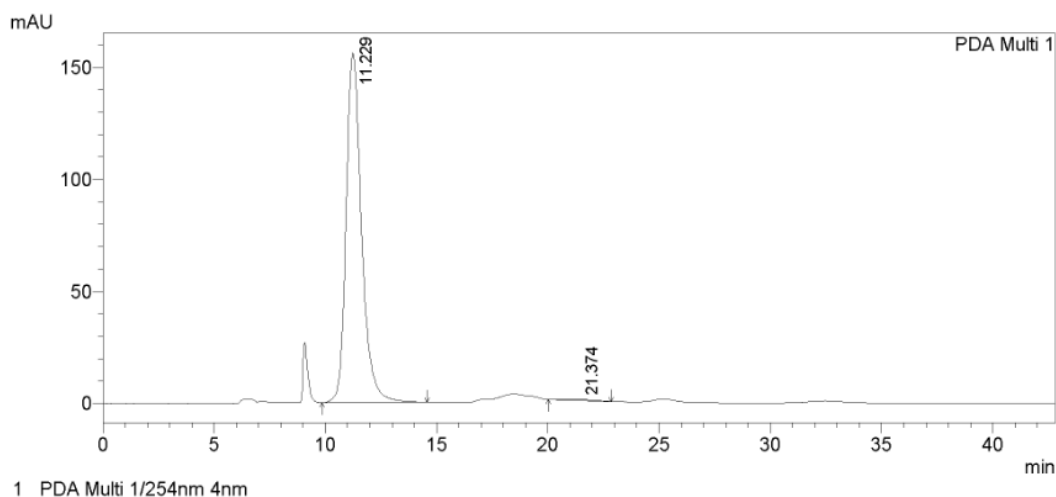

PeakTable

| Peak# | Ret. Time | Area    | Height | Area %  | Height % |
|-------|-----------|---------|--------|---------|----------|
| 1     | 11.229    | 7516319 | 155875 | 99.444  | 99.670   |
| 2     | 21.374    | 42030   | 517    | 0.556   | 0.330    |
| Total |           | 7558350 | 156392 | 100.000 | 100.000  |

**(2*S*,11*bS*)-2-hydroxy-11*b*-(3-methoxyphenyl)-2-phenyl-1,2,5,6,11,11*b*-hexahydro-3*H*-indolizino[8,7-*b*]indol-3-one (2*g*)**

White solid (71 mg, 83% yield). m.p. 146-148 °C;  $[\alpha]_{25}^D = 80.0^\circ$  ( $c = 0.5$ ,  $\text{CHCl}_3$ ); ee = 98% (DAICEL Chiralpak AS-H, hexane/2-propanol = 70/30,  $\lambda = 254$  nm, flow rate = 0.5 mL/min); IR (KBr)  $\nu$  3331, 3058, 2937, 2847, 1655, 1600, 1492, 1446, 1262  $\text{cm}^{-1}$ ;  $^1\text{H}$  NMR (400MHz,  $\text{DMSO-}d_6$ , TMS)  $\delta$  (ppm) 11.45 (s, 1H), 7.44-7.40 (m, 4H), 7.35-7.32 (m, 2H), 7.28-7.23 (m, 2H), 7.15-7.11 (m, 1H), 7.04-7.00 (m, 1H), 7.89-7.78 (m, 3H), 6.05 (s, 1H), 5.76 (s, 1H), 4.34-4.30 (m, 1H), 3.15-3.02 (m, 2H), 2.95-2.86 (m, 1H), 2.78-2.68 (m, 2H);  $^{13}\text{C}$  NMR (100MHz,  $\text{DMSO-}d_6$ , TMS)  $\delta$  (ppm) 174.5, 159.3, 145.6, 143.8, 136.2, 136.1, 129.7, 128.0, 127.3, 126.2, 125.8, 121.4, 118.8, 118.1, 112.4, 112.2, 111.3, 106.3, 78.2, 62.7, 55.0, 51.6, 36.2, 19.9; HRMS (ESI) Calcd. for  $\text{C}_{27}\text{H}_{24}\text{N}_2\text{O}_3\text{Na}$ ,  $[\text{M}+\text{Na}]^+$  447.1679. Found: 447.1681.

Chiral HPLC analysis of racemic **2g**.

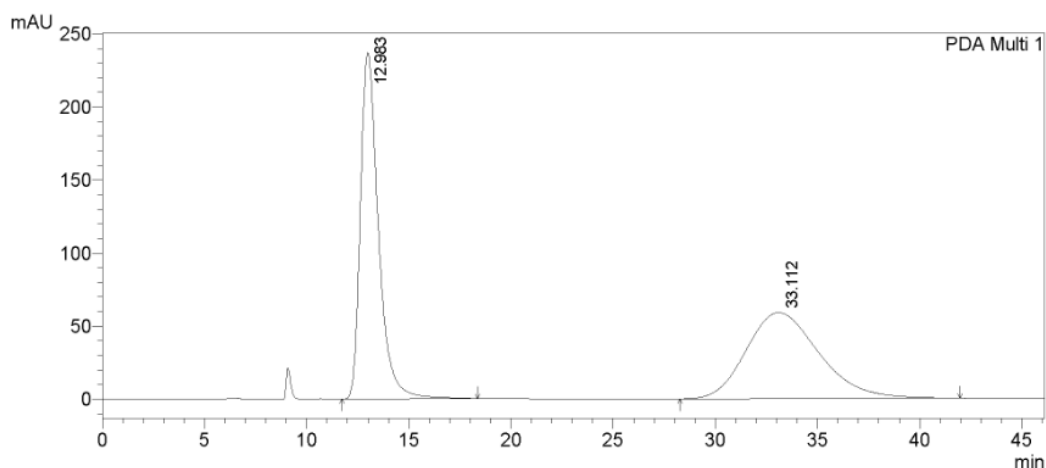

PeakTable

| Peak# | Ret. Time | Area     | Height | Area %  | Height % |
|-------|-----------|----------|--------|---------|----------|
| 1     | 12.983    | 14495471 | 236841 | 49.795  | 80.098   |
| 2     | 33.112    | 14614569 | 58848  | 50.205  | 19.902   |
| Total |           | 29110039 | 295689 | 100.000 | 100.000  |

Chiral HPLC analysis of **2g** from asymmetric reaction.

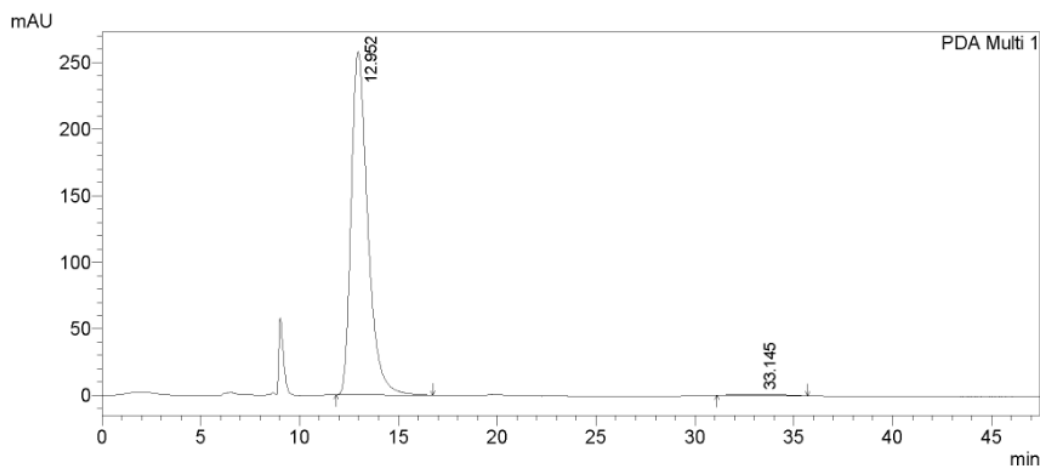

1 PDA Multi 1/254nm 4nm

PeakTable

PDA Ch1 254nm 4nm

| Peak# | Ret. Time | Area     | Height | Area %  | Height % |
|-------|-----------|----------|--------|---------|----------|
| 1     | 12.952    | 15043969 | 258007 | 99.020  | 99.635   |
| 2     | 33.145    | 148966   | 945    | 0.980   | 0.365    |
| Total |           | 15192935 | 258952 | 100.000 | 100.000  |

**(2*S*,11*bS*)-2-(3-bromophenyl)-11*b*-(4-bromophenyl)-2-hydroxy-1,2,5,6,11,11*b*-hexahydro-3*H*-indolizino[8,7-*b*]indol-3-one (2*h*)**

White solid (99 mg, 90% yield). m.p. 184-187 °C;  $[\alpha]_{25}^D = 118.0^\circ$  ( $c = 0.5$ ,  $\text{CHCl}_3$ ); ee = 99.5% (DAICEL Chiralpak AS-H, hexane/2-propanol = 70/30,  $\lambda = 254$  nm, flow rate = 0.5 mL/min); IR (KBr)  $\nu$  3322, 1669, 1451, 1433, 1395  $\text{cm}^{-1}$ ;  $^1\text{H}$  NMR (400MHz,  $\text{DMSO-}d_6$ , TMS)  $\delta$  (ppm) 11.47 (s, 1H), 7.55-7.28 (m, 10H), 7.13 (t,  $J = 7.6$  Hz, 1H), 7.02 (t,  $J = 7.3$  Hz, 1H), 6.22 (s, 1H), 4.32-4.29 (m, 1H), 3.11 (d,  $J = 14.2$  Hz, 1H), 3.07-3.00 (m, 1H), 2.93-2.84 (m, 1H), 2.74-2.68 (m, 2H);  $^{13}\text{C}$  NMR (100MHz,  $\text{DMSO-}d_6$ , TMS)  $\delta$  (ppm) 174.0, 145.8, 143.0, 136.1, 135.5, 131.5, 130.31, 130.26, 128.7, 128.2, 126.2, 125.0, 121.5, 121.4, 120.8, 118.9, 118.2, 111.4, 106.4, 77.7, 62.5, 51.0, 36.4, 19.9; HRMS (ESI) Calcd. for  $\text{C}_{26}\text{H}_{19}\text{N}_2\text{O}_2\text{Br}_2$ ,  $[\text{M-H}]^+$  550.9793. Found: 550.9788.

Chiral HPLC analysis of racemic **2h**.

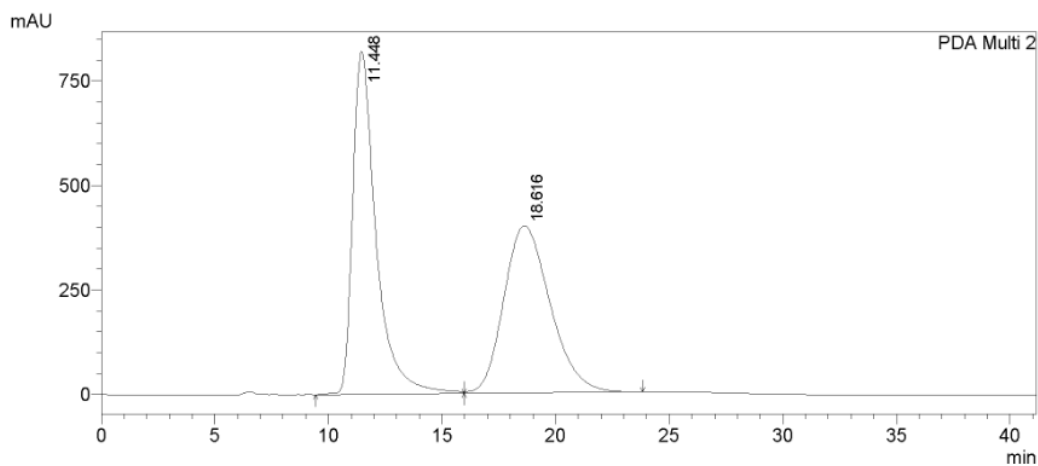

1 PDA Multi 2/220nm 4nm

PeakTable

| PDA Ch2 220nm 4nm |           |           |         |         |          |
|-------------------|-----------|-----------|---------|---------|----------|
| Peak#             | Ret. Time | Area      | Height  | Area %  | Height % |
| 1                 | 11.448    | 58570125  | 819714  | 50.783  | 67.221   |
| 2                 | 18.616    | 56763938  | 399710  | 49.217  | 32.779   |
| Total             |           | 115334063 | 1219425 | 100.000 | 100.000  |

Chiral HPLC analysis of **2h** from asymmetric reaction.

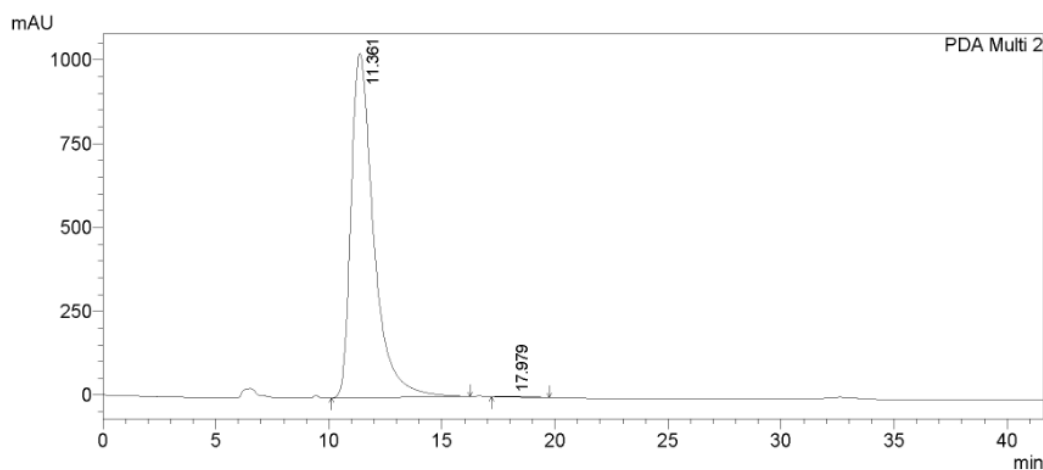

1 PDA Multi 2/220nm 4nm

峰表

| PDA Ch2 220nm 4nm |        |          |         |         |         |
|-------------------|--------|----------|---------|---------|---------|
| 峰#                | 保留时间   | 面积       | 高度      | 面积 %    | 高度 %    |
| 1                 | 11.361 | 71639672 | 1026415 | 99.735  | 99.805  |
| 2                 | 17.979 | 190415   | 2003    | 0.265   | 0.195   |
| Total             |        | 71830087 | 1028418 | 100.000 | 100.000 |

**(2*S*,11*bS*)-2,11*b*-bis(4-bromophenyl)-2-hydroxy-1,2,5,6,11,11*b*-hexahydro-3*H*-indolizino[8,7-*b*]indol-3-one (2i)**

White solid (98 mg, 89% yield). m.p. 286-288 °C;  $[\alpha]_{25}^D = 145.3^\circ$  ( $c = 0.5$ ,  $\text{CHCl}_3$ ); ee = 97% (DAICEL Chiralpak AS-H, hexane/2-propanol = 70/30,  $\lambda = 254$  nm, flow rate = 0.5 mL/min); IR (KBr)  $\nu$  3256, 1678, 1487, 1442, 1426, 1395  $\text{cm}^{-1}$ ;  $^1\text{H}$  NMR (400MHz,  $\text{DMSO-}d_6$ , TMS)  $\delta$ (ppm) 11.46 (s, 1H), 7.53 (d,  $J = 6.9$  Hz, 4H), 7.42 (t,  $J = 7.8$  Hz, 2H), 7.34 (d,  $J = 8.7$  Hz, 2H), 7.25 (d,  $J = 8.7$  Hz, 2H), 7.13 (t,  $J = 7.6$  Hz,



1H), 7.02 (t,  $J = 7.6$  Hz, 1H), 6.17 (s, 1H), 4.30-4.27 (m, 1H), 3.13 (d,  $J = 14.2$  Hz, 1H), 3.02-2.96 (m, 1H), 2.93-2.86 (m, 1H), 2.72-2.66 (m, 2H);  $^{13}\text{C}$  NMR (100MHz, DMSO- $d_6$ , TMS)  $\delta$  (ppm) 174.3, 143.2, 142.8, 136.1, 135.5, 131.5, 130.9, 128.3, 128.2, 126.3, 121.5, 120.8, 120.6, 118.9, 118.2, 111.4, 106.5, 77.9, 62.6, 51.1, 36.4, 19.9; HRMS (ESI) Calcd. for  $\text{C}_{26}\text{H}_{19}\text{N}_2\text{O}_2\text{Br}_2$ ,  $[\text{M}-\text{H}]^+$  550.9793. Found: 550.9788.

Chiral HPLC analysis of racemic **2i**.

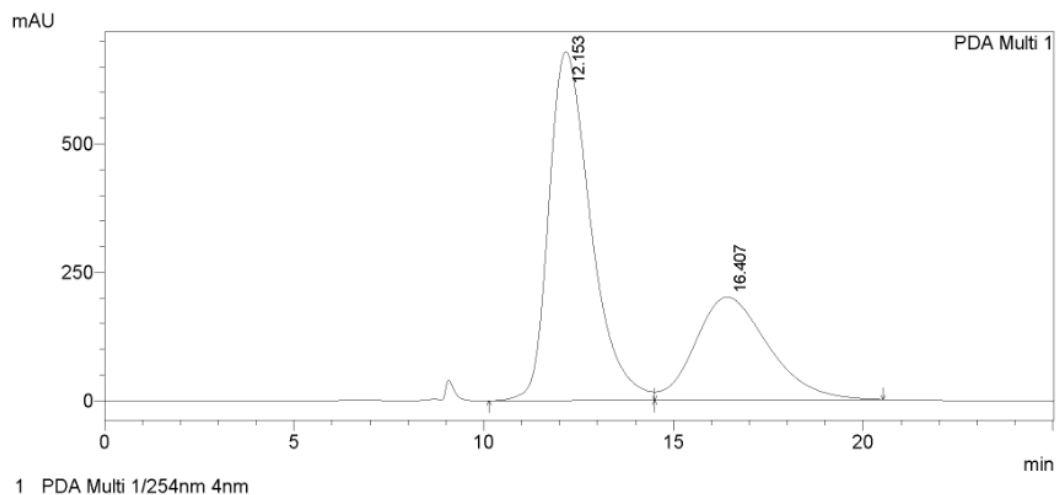

PeakTable

| Peak# | Ret. Time | Area     | Height | Area %  | Height % |
|-------|-----------|----------|--------|---------|----------|
| 1     | 12.153    | 52186221 | 679385 | 66.049  | 77.229   |
| 2     | 16.407    | 26824699 | 200314 | 33.951  | 22.771   |
| Total |           | 79010921 | 879699 | 100.000 | 100.000  |

Chiral HPLC analysis of **2i** from asymmetric reaction.

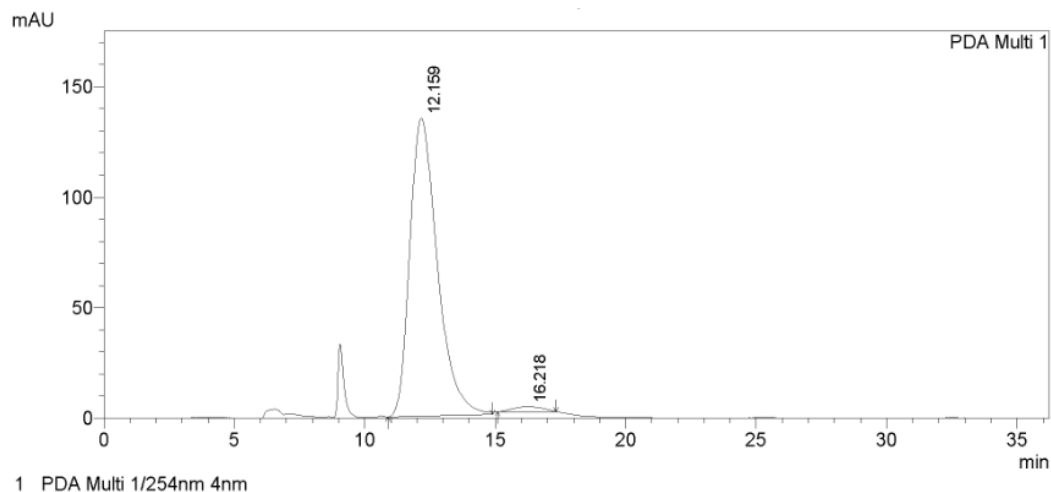

PeakTable

| Peak# | Ret. Time | Area     | Height | Area %  | Height % |
|-------|-----------|----------|--------|---------|----------|
| 1     | 12.159    | 9896450  | 134719 | 98.258  | 98.363   |
| 2     | 16.218    | 175447   | 2242   | 1.742   | 1.637    |
| Total |           | 10071897 | 136961 | 100.000 | 100.000  |

**(2*S*,11*bS*)-11*b*-(4-bromophenyl)-2-hydroxy-2-(*p*-tolyl)-1,2,5,6,11,11*b*-hexahydro-3**

### ***H*-indolizino[8,7-*b*]indol-3-one (2j)**

White solid (88 mg, 90% yield). m.p. 272-274 °C;  $[\alpha]_{25}^D = 151.3^\circ$  ( $c = 0.5$ ,  $\text{CHCl}_3$ ); ee = 92% (DAICEL Chiralpak AS-H, hexane/2-propanol = 70/30,  $\lambda = 254$  nm, flow rate = 0.5 mL/min); IR (KBr)  $\nu$  3358, 3271, 1680, 1441, 1422  $\text{cm}^{-1}$ ;  $^1\text{H}$  NMR (400MHz,  $\text{DMSO-}d_6$ , TMS)  $\delta$  (ppm) 11.45 (s, 1H), 7.52 (d,  $J = 8.3$  Hz, 2H), 7.42 (t,  $J = 6.6$  Hz, 2H), 7.26 (t,  $J = 9.2$  Hz, 4H), 7.15-7.11 (m, 3H), 7.02 (t,  $J = 7.6$  Hz, 1H), 5.98 (s, 1H), 4.32-4.27 (m, 1H), 3.13 (d,  $J = 14.2$  Hz, 2H), 3.01-2.96 (m, 1H), 2.93-2.86 (m, 1H), 2.68 (d,  $J = 13.7$  Hz, 2H), 2.28 (s, 3H);  $^{13}\text{C}$  NMR (100MHz,  $\text{DMSO-}d_6$ , TMS)  $\delta$  (ppm) 174.8, 143.4, 140.6, 136.4, 136.1, 135.8, 131.5, 128.5, 128.2, 126.3, 125.7, 121.5, 120.7, 118.8, 118.1, 111.4, 106.5, 78.0, 62.4, 51.5, 36.2, 20.7, 19.9; HRMS (ESI) Calcd. for  $\text{C}_{27}\text{H}_{22}\text{N}_2\text{O}_2\text{Br}$ ,  $[\text{M-H}]^+$  485.0870. Found: 485.0863.

Chiral HPLC analysis of racemic **2j**.

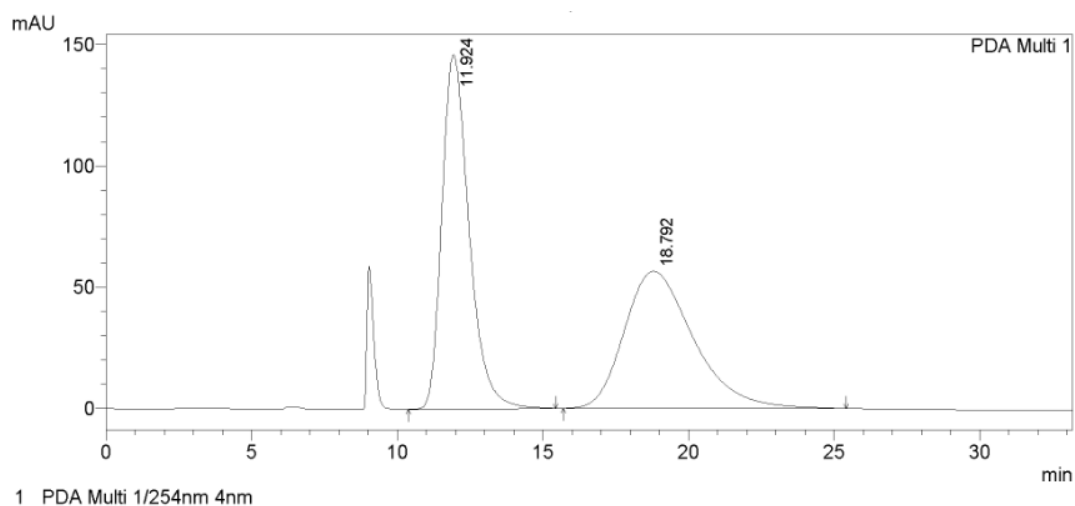

PeakTable

| Peak# | Ret. Time | Area     | Height | Area %  | Height % |
|-------|-----------|----------|--------|---------|----------|
| 1     | 11.924    | 9475523  | 145997 | 50.452  | 72.105   |
| 2     | 18.792    | 9305571  | 56482  | 49.548  | 27.895   |
| Total |           | 18781094 | 202479 | 100.000 | 100.000  |

Chiral HPLC analysis of **2j** from asymmetric reaction.

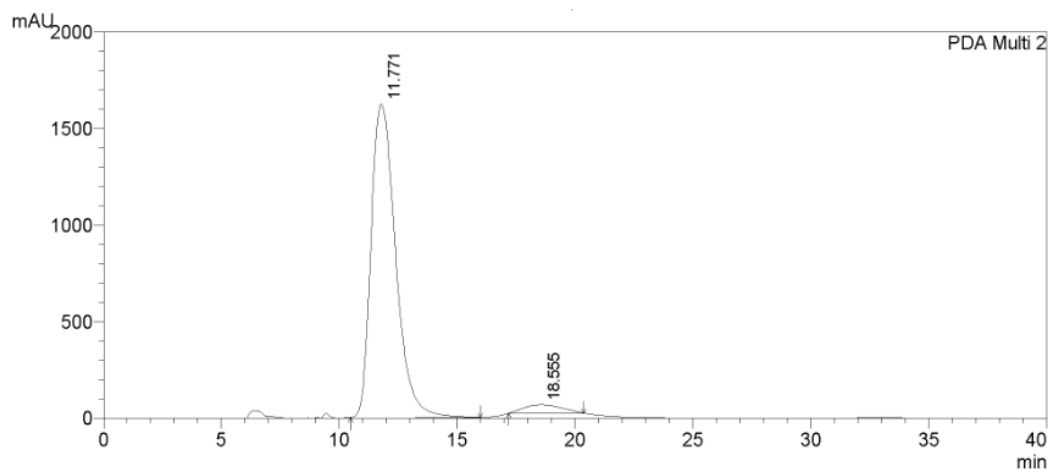

PeakTable

| Peak# | Ret. Time | Area      | Height  | Area %  | Height % |
|-------|-----------|-----------|---------|---------|----------|
| 1     | 11.771    | 118196578 | 1626113 | 96.018  | 97.423   |
| 2     | 18.555    | 4902302   | 43012   | 3.982   | 2.577    |
| Total |           | 123098880 | 1669126 | 100.000 | 100.000  |

**(2*S*,11*bS*)-11*b*-(4-bromophenyl)-8-chloro-2-hydroxy-2-phenyl-1,2,5,6,11,11*b*-hexahydro-3*H*-indolizino[8,7-*b*]indol-3-one (2*k*)**

White solid (87 mg, 86% yield). m.p. 274-277 °C;  $[\alpha]_{25}^D = 124.0^\circ$  ( $c = 0.5$ ,  $\text{CHCl}_3$ ); ee = 96% (DAICEL Chiralpak AS-H, hexane/2-propanol = 70/30,  $\lambda = 254$  nm, flow rate = 0.5 mL/min); IR (KBr)  $\nu$  3364, 3267, 1686, 1488, 1446, 1428, 1397  $\text{cm}^{-1}$ ;  $^1\text{H}$  NMR (400MHz,  $\text{DMSO-}d_6$ , TMS)  $\delta$  (ppm)  $\delta$  11.71 (s, 1H), 7.53 (d,  $J = 8.2$  Hz, 2H), 7.49 (d,  $J = 1.8$  Hz, 1H), 7.44-7.39 (m, 3H), 7.34 (t,  $J = 7.6$  Hz, 2H), 7.28- 7.24 (m, 3H), 7.15-7.12 (m, 1H), 6.08 (s, 1H), 4.30-4.26 (m, 1H), 3.14 (d,  $J = 14.2$  Hz, 1H), 3.02-2.95 (m, 1H), 2.91-2.83 (m, 1H), 2.71-2.66 (m, 2H);  $^{13}\text{C}$  NMR (100MHz,  $\text{DMSO-}d_6$ , TMS)  $\delta$  (ppm) 174.8, 143.4, 143.1, 137.5, 134.5, 131.6, 128.2, 128.0, 127.5, 127.3, 125.8, 123.5, 121.4, 120.8, 117.6, 112.9, 106.6, 78.1, 62.5, 51.4, 36.2, 19.7; HRMS (ESI) Calcd. for  $\text{C}_{26}\text{H}_{19}\text{N}_2\text{O}_2\text{ClBr}$ ,  $[\text{M-H}]^+$  507.0298. Found: 507.0290.

Chiral HPLC analysis of racemic **2k**.

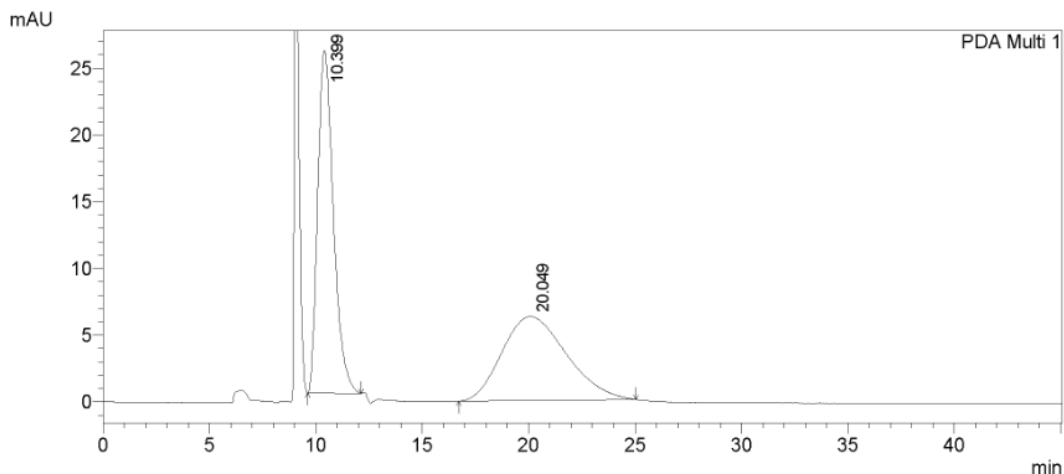

PeakTable

| Peak# | Ret. Time | Area    | Height | Area %  | Height % |
|-------|-----------|---------|--------|---------|----------|
| 1     | 10.399    | 1319788 | 25675  | 49.745  | 80.274   |
| 2     | 20.049    | 1333335 | 6309   | 50.255  | 19.726   |
| Total |           | 2653124 | 31984  | 100.000 | 100.000  |

Chiral HPLC analysis of **2k** from asymmetric reaction.

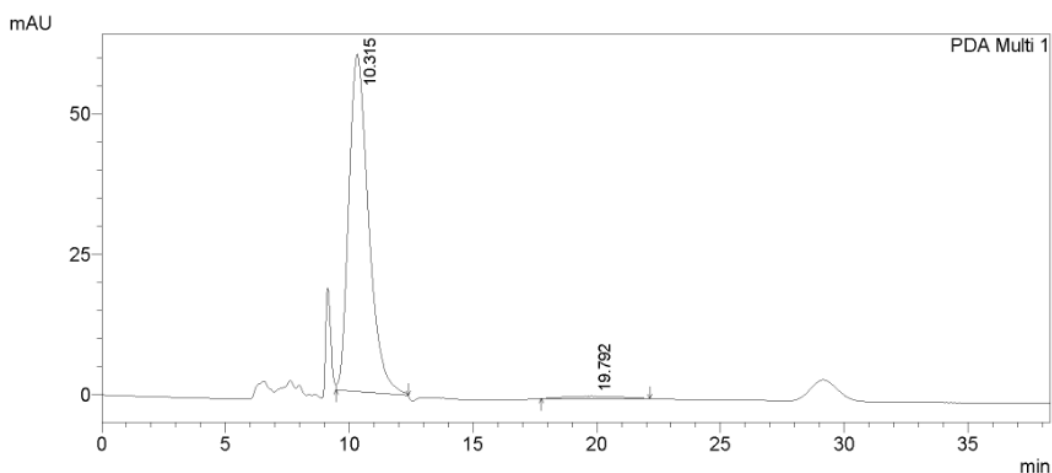

PeakTable

| Peak# | Ret. Time | Area    | Height | Area %  | Height % |
|-------|-----------|---------|--------|---------|----------|
| 1     | 10.315    | 3339980 | 59990  | 98.000  | 99.274   |
| 2     | 19.792    | 68157   | 438    | 2.000   | 0.726    |
| Total |           | 3408137 | 60429  | 100.000 | 100.000  |

**(2*S*,11*bS*)-11*b*-(4-bromophenyl)-2-hydroxy-8-methyl-2-phenyl-1,2,5,6,11,11*b*-hexahydro-3*H*-indolizino[8,7-*b*]indol-3-one (2l)**

White solid (86 mg, 88% yield). m.p. 251-254 °C;  $[\alpha]_{25}^D = 138.0^\circ$  ( $c = 0.5$ ,  $\text{CHCl}_3$ ); ee = 96% (DAICEL Chiralpak AS-H, hexane/2-propanol = 70/30,  $\lambda = 254$  nm, flow rate = 0.5 mL/min); IR (KBr)  $\nu$  3406, 3286, 1710, 1679, 1440, 1447, 1412, 1396  $\text{cm}^{-1}$ ;  $^1\text{H}$  NMR (400MHz,  $\text{CDCl}_3$ , TMS)  $\delta$  (ppm)  $\delta$  8.13 (s, 1H), 7.45-7.42 (m, 2H), 7.34-7.29

(m, 6H), 7.23 (d,  $J = 8.7$  Hz, 1H), 7.04 (d,  $J = 8.2$  Hz, 1H), 6.94 (d,  $J = 8.7$  Hz, 2H), 4.42-4.38 (m, 1H), 3.13-2.97 (m, 3H), 2.92 (d,  $J = 14.2$  Hz, 1H), 2.72-2.67 (m, 1H), 2.46 (s, 3H);  $^{13}\text{C}$  NMR (100MHz,  $\text{CDCl}_3$ , TMS)  $\delta$  (ppm) 174.6, 142.5, 141.8, 134.5, 134.4, 131.7, 129.6, 128.7, 128.5, 128.3, 126.9, 125.7, 124.3, 122.2, 118.5, 111.0, 109.0, 79.4, 63.1, 50.3, 36.5, 21.5, 20.2; HRMS (ESI) Calcd. for  $\text{C}_{27}\text{H}_{22}\text{N}_2\text{O}_2\text{Br}$ ,  $[\text{M}-\text{H}]^+$  487.0844. Found: 487.0843.

Chiral HPLC analysis of racemic **2l**.

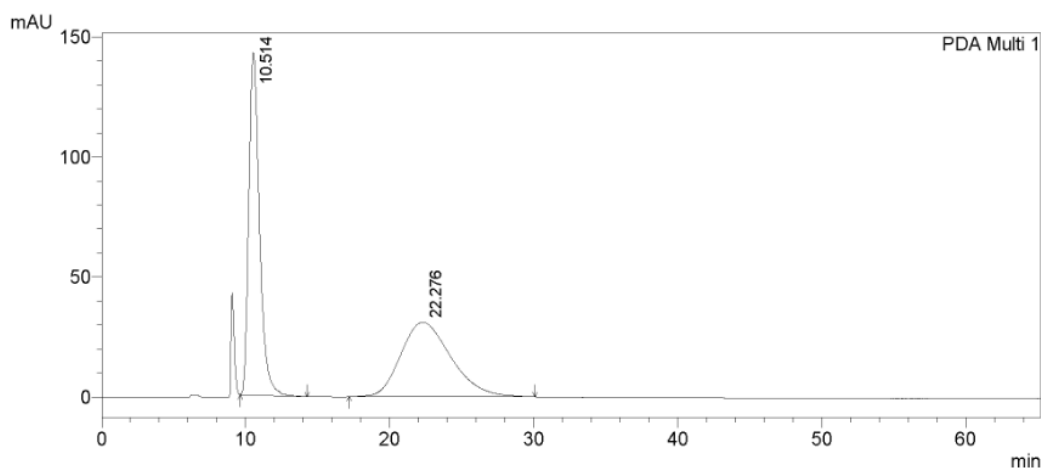

1 PDA Multi 1/254nm 4nm

PeakTable

PDA Ch1 254nm 4nm

| Peak# | Ret. Time | Area     | Height | Area %  | Height % |
|-------|-----------|----------|--------|---------|----------|
| 1     | 10.514    | 7371805  | 142743 | 49.465  | 82.117   |
| 2     | 22.276    | 7531361  | 31086  | 50.535  | 17.883   |
| Total |           | 14903166 | 173829 | 100.000 | 100.000  |

Chiral HPLC analysis of **2l** from asymmetric reaction.

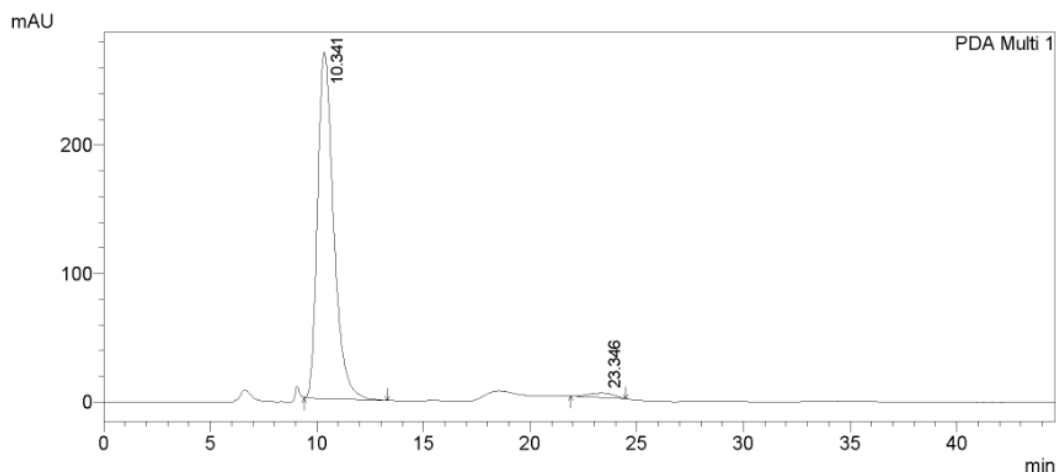

1 PDA Multi 1/254nm 4nm

PeakTable

PDA Ch1 254nm 4nm

| Peak# | Ret. Time | Area     | Height | Area %  | Height % |
|-------|-----------|----------|--------|---------|----------|
| 1     | 10.341    | 14234773 | 269993 | 97.981  | 98.708   |
| 2     | 23.346    | 293285   | 3535   | 2.019   | 1.292    |
| Total |           | 14528058 | 273527 | 100.000 | 100.000  |

**(2*S*,11*bS*)-11*b*-(4-bromophenyl)-2-hydroxy-8-methoxy-2-phenyl-1,2,5,6,11,11*b*-hexahydro-3*H*-indolizino[8,7-*b*]indol-3-one (**2m**)**

White solid (87 mg, 86% yield). m.p. 165-167 °C;  $[\alpha]_{25}^D = 142.0^\circ$  ( $c = 0.5$ ,  $\text{CHCl}_3$ ); ee = 94% (DAICEL Chiralpak AS-H, hexane/2-propanol = 70/30,  $\lambda = 254$  nm, flow rate = 0.5 mL/min); IR (KBr)  $\nu$  3406, 3310, 1693, 1677, 1487, 1436, 1401, 1217  $\text{cm}^{-1}$ ;  $^1\text{H}$  NMR (400MHz,  $\text{CDCl}_3$ , TMS)  $\delta$  (ppm) 11.29 (s, 1H), 7.52 (d,  $J = 8.2$  Hz, 2H), 7.39 (d,  $J = 6.9$  Hz, 2H), 7.35-7.24 (m, 6H), 6.93 (d,  $J = 2.3$  Hz, 1H), 6.78- 6.76 (m, 1H), 6.05 (s, 1H), 4.31-4.28 (m, 1H), 3.76 (s, 3H), 3.13 (d,  $J = 13.8$  Hz, 1H), 3.03-2.95 (m, 1H), 2.91-2.83 (m, 1H), 2.70-2.63 (m, 2H);  $^{13}\text{C}$  NMR (100MHz,  $\text{CDCl}_3$ , TMS)  $\delta$  (ppm) 174.7, 153.4, 143.5, 143.4, 136.3, 131.5, 131.1, 128.2, 128.0, 127.3, 126.6, 125.8, 120.7, 112.0, 111.4, 106.3, 100.2, 78.2, 62.6, 55.4, 51.5, 36.3, 19.9; HRMS (ESI) Calcd. for  $\text{C}_{27}\text{H}_{22}\text{N}_2\text{O}_3\text{Br}$ ,  $[\text{M}-\text{H}]^+$  501.0819. Found: 501.0812.

Chiral HPLC analysis of racemic **2m**.

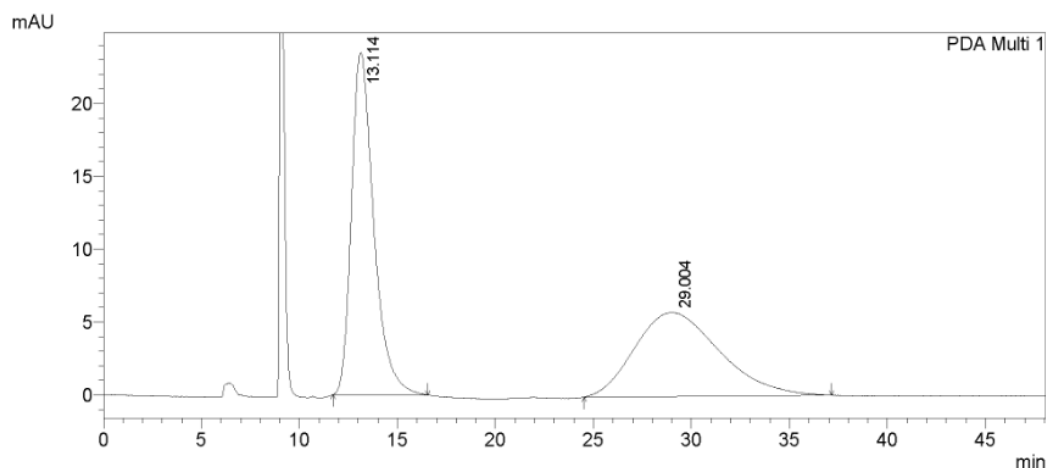

1 PDA Multi 1/254nm 4nm

PeakTable

PDA Ch1 254nm 4nm

| Peak# | Ret. Time | Area    | Height | Area %  | Height % |
|-------|-----------|---------|--------|---------|----------|
| 1     | 13.114    | 1860241 | 23485  | 51.802  | 80.290   |
| 2     | 29.004    | 1730849 | 5765   | 48.198  | 19.710   |
| Total |           | 3591090 | 29250  | 100.000 | 100.000  |

Chiral HPLC analysis of **2m** from asymmetric reaction.

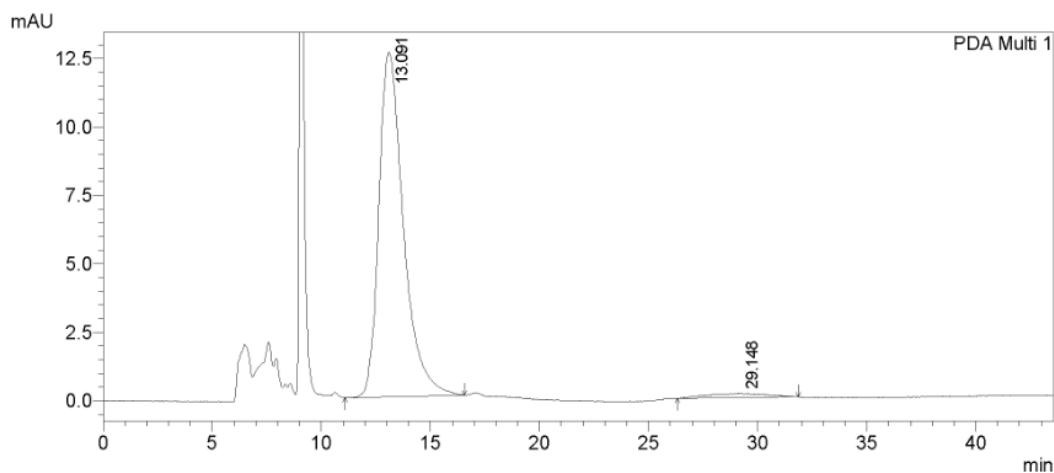

1 PDA Multi 1/254nm 4nm

PeakTable

PDA Ch1 254nm 4nm

| Peak# | Ret. Time | Area    | Height | Area %  | Height % |
|-------|-----------|---------|--------|---------|----------|
| 1     | 13.091    | 985823  | 12580  | 97.072  | 98.754   |
| 2     | 29.148    | 29737   | 159    | 2.928   | 1.246    |
| Total |           | 1015560 | 12739  | 100.000 | 100.000  |

## 6. Synthesis of 3, 4 and 5

### 6.1 Synthesis of 3

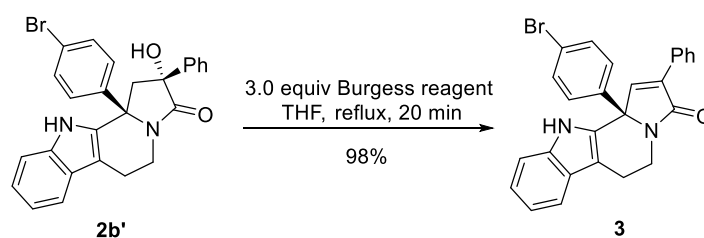

A mixture of **2b'** (94.7 mg, 0.2 mmol) and Burgess reagent (153.8 mg, 0.6 mmol) were refluxed in THF (5 mL) until raw materials disappeared about 20 min. Water was added to quench the reaction and the mixture was extracted with ethyl acetate (3×5 mL). The combined organic phases were dried over anhydrous Na<sub>2</sub>SO<sub>4</sub> and concentrated in vacuo. Flash chromatography on silica gel (PE:EA = 2:1) afforded **3** as white solid.

#### **(R)-11b-(4-bromophenyl)-2-phenyl-5,6,11,11b-tetrahydro-3H-indolizino[8,7-b]indol-3-one (3)**

White solid (89 mg, 98% yield). m.p. 294-295 °C;  $[\alpha]_{25}^D = -122.0^\circ$  ( $c = 0.5$ , CHCl<sub>3</sub>); ee = -97% (DAICEL Chiralpak OD-H, hexane/2-propanol = 80/20,  $\lambda = 254$  nm, flow rate = 0.5 mL/min); IR (KBr)  $\nu$  3230, 3060, 1664, 1485, 1403 cm<sup>-1</sup>; <sup>1</sup>H NMR

(400MHz, DMSO-*d*<sub>6</sub>, TMS)  $\delta$  (ppm) 11.51 (s, 1H), 7.97-7.93 (m, 3H), 7.60-7.57 (m, 2H), 7.50-7.37 (m, 5H), 7.17-7.10 (m, 3H), 7.06-7.02 (m, 1H), 4.40-4.36 (m, 1H), 3.03-2.95 (m, 1H), 2.86-2.77 (m, 1H); <sup>13</sup>C NMR (100MHz, DMSO-*d*<sub>6</sub>, TMS)  $\delta$  (ppm) 168.9, 143.7, 138.2, 136.3, 134.0, 131.8, 131.5, 130.8, 129.1, 129.0, 128.6, 127.1, 126.0, 122.1, 121.7, 119.1, 118.7, 111.5, 107.9, 65.8, 35.0, 21.0; HRMS (ESI) Calcd. for C<sub>26</sub>H<sub>19</sub>N<sub>2</sub>OBrNa, [M+Na]<sup>+</sup> 477.0573. Found: 477.0572.

Chiral HPLC analysis of racemic **3**.

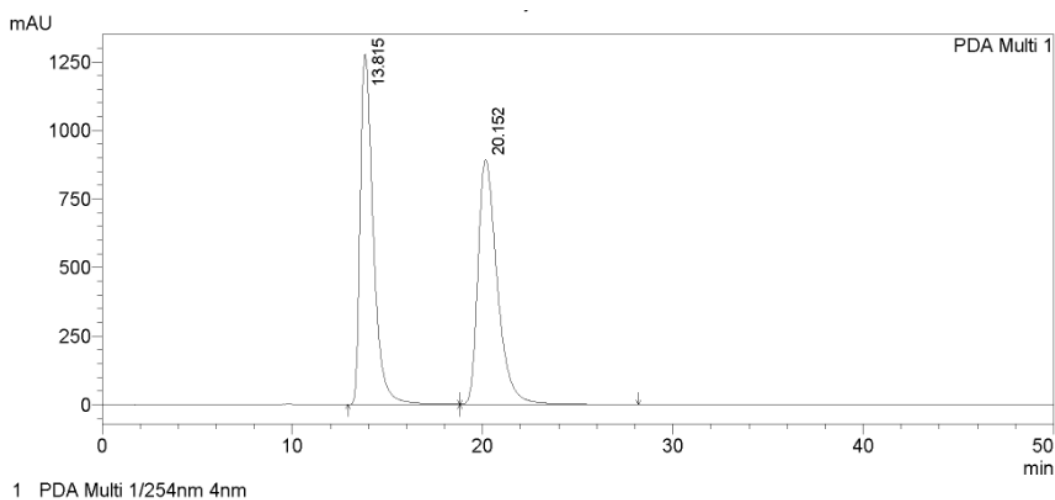

峰表

PDA Ch1 254nm 4nm

| 峰#    | 保留时间   | 面积        | 高度      | 面积 %    | 高度 %    |
|-------|--------|-----------|---------|---------|---------|
| 1     | 13.815 | 61171762  | 1276598 | 49.345  | 58.866  |
| 2     | 20.152 | 62795865  | 892063  | 50.655  | 41.134  |
| Total |        | 123967627 | 2168661 | 100.000 | 100.000 |

Chiral HPLC analysis of **3** from asymmetric reaction.



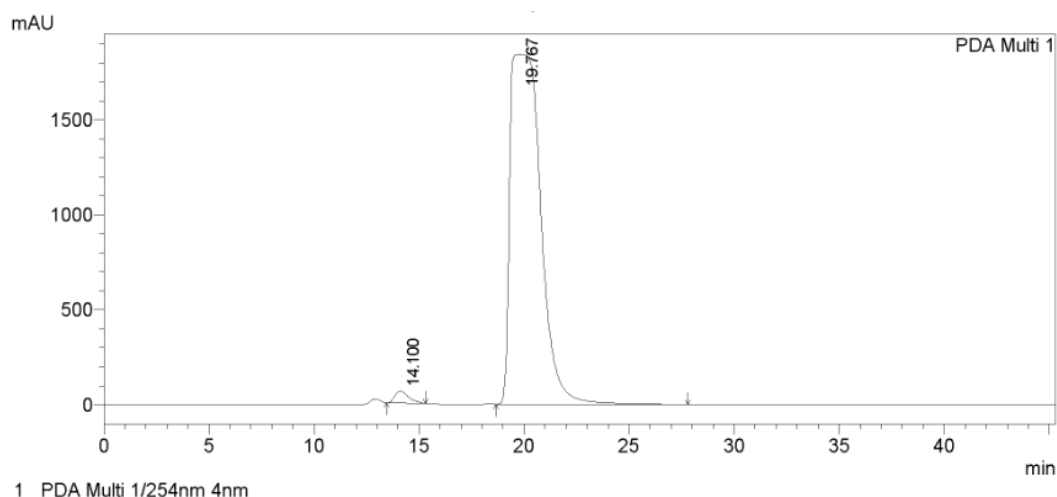

峰表

| 峰#    | 保留时间   | 面积        | 高度      | 面积 %    | 高度 %    |
|-------|--------|-----------|---------|---------|---------|
| 1     | 14.100 | 2925145   | 63488   | 1.539   | 3.326   |
| 2     | 19.767 | 187113253 | 1845230 | 98.461  | 96.674  |
| Total |        | 190038397 | 1908718 | 100.000 | 100.000 |

## 6.2 Synthesis of 4

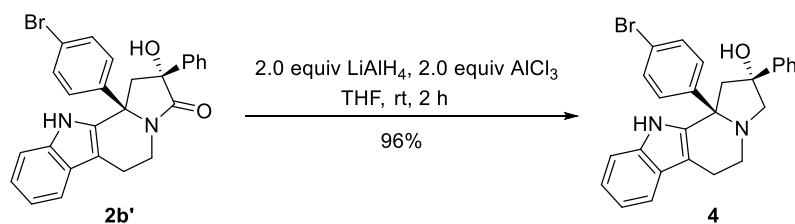

To a flask (10 mL) equipped with a magnetic stirrer was added LiAlH<sub>4</sub> (15.3 mg, 0.4 mmol), AlCl<sub>3</sub> (52.9 mg, 0.4 mmol), **2b'** (94.7 mg, 0.2 mmol) and dry THF (5 mL) under argon protection. The reaction mixture was stirred at room temperature for 2 h and then saturated NH<sub>4</sub>Cl aqueous solution (0.2 mL) was added to quench the reaction. The mixture was extracted with ethyl acetate (3×10 mL), and combined organic layer was washed with brine and dried over anhydrous Na<sub>2</sub>SO<sub>4</sub>. The solvents were removed in *vacuo* and the residue was purified by flash column chromatography (PE:EA = 4:1) to afford products **4**.

### (2*R*,11*bR*)-11*b*-(4-bromophenyl)-2-phenyl-2,3,5,6,11,11*b*-hexahydro-1*H*-indolizin-*o*[8,7-*b*]indol-2-ol (**4**)

White solid (88 mg, 96% yield). m.p. 128-130 °C; [ $\alpha$ ]<sub>25</sub><sup>D</sup> = 32.7° (*c* = 0.5, CHCl<sub>3</sub>); ee = -96% (DAICEL Chiralpak OD-H, hexane/2-propanol = 80/20,  $\lambda$  = 254 nm, flow rate = 0.5 mL/min); IR (KBr)  $\nu$  3422, 3056, 2921, 2846, 1485, 1460, 1447, 1393 cm<sup>-1</sup>;

$^1\text{H}$  NMR (400MHz, ACETONE- $\text{D}_6$ , TMS)  $\delta$  (ppm) 10.34 (s, 1H), 7.76-7.74 (m, 2H), 7.50 (d,  $J = 8.0$  Hz, 1H), 7.43-7.40 (m, 3H), 7.38-7.33 (m, 4H), 7.25-7.22 (m, 1H), 7.15-7.11 (m, 1H), 7.07-7.03 (m, 1H), 3.61 (d,  $J = 9.6$  Hz, 1H), 3.47 (d,  $J = 9.6$  Hz, 1H), 3.19 (dd,  $J = 13.6, 5.6$  Hz, 1H), 3.11-3.06 (m, 2H), 2.96-2.86 (m, 2H), 2.63 (d,  $J = 14.0$  Hz, 1H), 2.51 (dd,  $J = 15.6, 4.4$  Hz, 1H);  $^{13}\text{C}$  NMR (100MHz, ACETONE- $\text{D}_6$ , TMS)  $\delta$  (ppm) 150.9, 147.1, 137.4, 136.2, 131.7, 130.2, 128.8, 128.4, 127.1, 125.7, 122.1, 121.0, 119.6, 119.0, 111.9, 108.3, 79.6, 68.1, 65.9, 59.4, 41.7, 16.7; HRMS (ESI) Calcd. for  $\text{C}_{26}\text{H}_{24}\text{N}_2\text{OBr}$ ,  $[\text{M}+\text{H}]^+$  459.1067. Found: 459.1063.

Chiral HPLC analysis of racemic **4**.

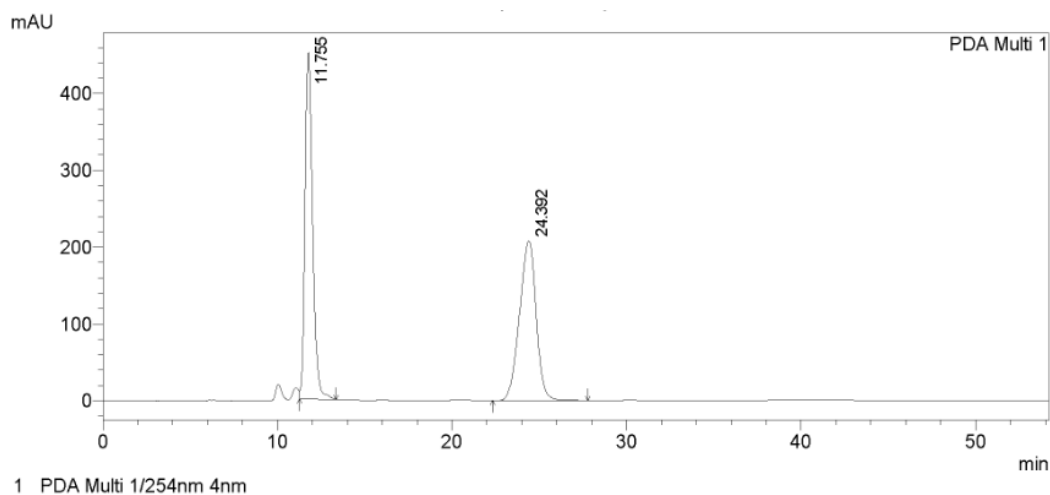

峰表

| 峰#    | 保留时间   | 面积       | 高度     | 面积 %    | 高度 %    |
|-------|--------|----------|--------|---------|---------|
| 1     | 11.755 | 13631891 | 450569 | 49.721  | 68.439  |
| 2     | 24.392 | 13784753 | 207786 | 50.279  | 31.561  |
| Total |        | 27416644 | 658355 | 100.000 | 100.000 |

Chiral HPLC analysis of **4** from asymmetric reaction.

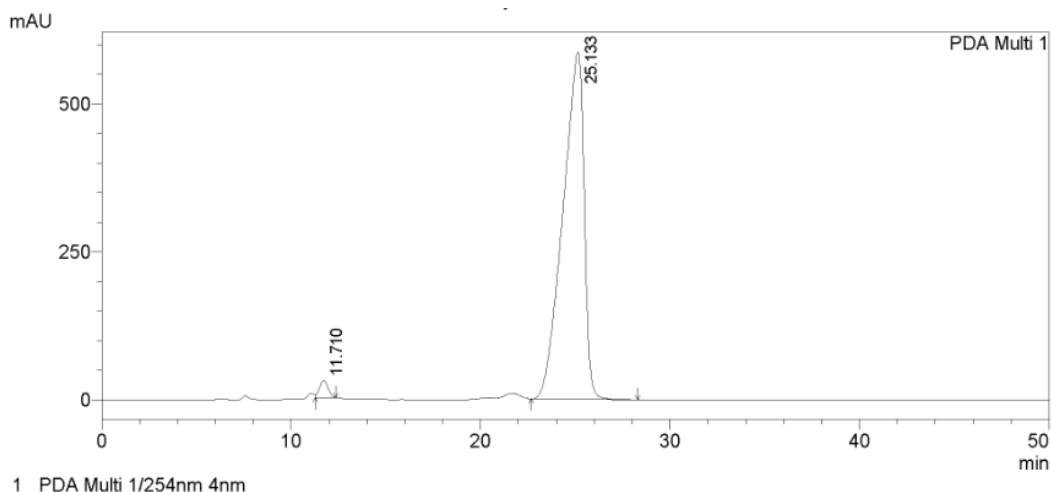

峰表

| 峰#    | 保留时间   | 面积       | 高度     | 面积 %    | 高度 %    |
|-------|--------|----------|--------|---------|---------|
| 1     | 11.710 | 943045   | 29672  | 2.016   | 4.811   |
| 2     | 25.133 | 45832504 | 587044 | 97.984  | 95.189  |
| Total |        | 46775549 | 616716 | 100.000 | 100.000 |

### 6.3 Synthesis of 5

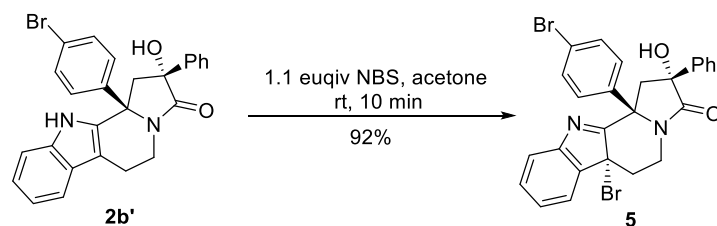

To a mixture of **2b'** (94.7 mg, 0.2 mmol) and dry acetone (5 mL) in flask was added NBS (39.2 mg, 0.22 mmol) in part. The mixture was kept stirring at room temperature until raw materials disappeared about 10 min. The residue was concentrated and purified by flash column chromatography on silica gel (PE:EA = 4:1) to give product **5**.

#### (2*R*,6*aR*,11*bR*)-6*a*-bromo-11*b*-(4-bromophenyl)-2-hydroxy-2-phenyl-1,2,5,6,6*a*,11*b*-hexahydro-3*H*-indolizino[8,7-*b*]indol-3-one (**5**)

White solid (101 mg, 92% yield). m.p. 187-189 °C;  $[\alpha]_{25}^D = 76.0^\circ$  ( $c = 0.5$ ,  $\text{CHCl}_3$ ); ee = -97.5% (DAICEL Chiralpak OD-H, hexane/2-propanol = 80/20,  $\lambda = 254$  nm, flow rate = 0.5 mL/min); IR (KBr)  $\nu$  3431, 1688, 1424, 1256  $\text{cm}^{-1}$ ;  $^1\text{H}$  NMR (400MHz,  $\text{CDCl}_3$ , TMS)  $\delta$  (ppm) 7.75 (d,  $J = 7.6$  Hz, 1H), 7.48-7.40 (m, 4H), 7.37-7.32 (m, 3H), 7.28-7.23 (m, 3H), 7.21-7.18 (m, 2H), 4.58-4.53 (m, 1H), 3.93 (d,  $J = 14.0$  Hz, 1H), 3.66-3.59 (m, 1H), 2.75-2.66 (m, 2H), 1.91-1.83 (m, 1H);  $^{13}\text{C}$  NMR (100MHz,

DMSO-*d*<sub>6</sub>, TMS)  $\delta$  (ppm) 181.3, 173.9, 152.1, 143.2, 141.4, 140.2, 131.4, 129.3, 127.8, 127.3, 127.0, 126.6, 125.8, 122.7, 121.1, 120.2, 80.7, 77.1, 65.8, 48.9, 38.2, 34.1; HRMS (ESI) Calcd. for C<sub>26</sub>H<sub>20</sub>N<sub>2</sub>O<sub>2</sub>Br<sub>2</sub>Na, [M+Na]<sup>+</sup> 572.9784. Found: 572.9783.

Chiral HPLC analysis of racemic **5**.

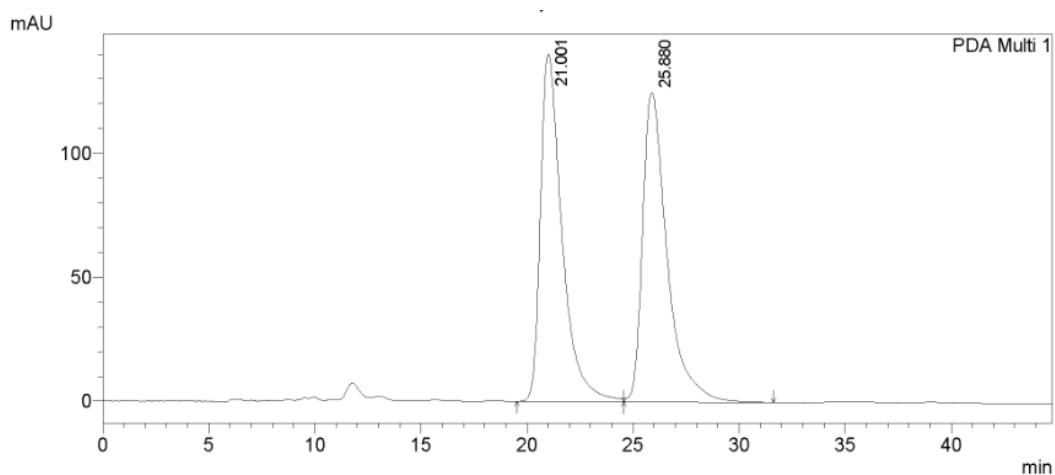

1 PDA Multi 1/254nm 4nm

峰表

| 峰#    | 保留时间   | 面积       | 高度     | 面积 %    | 高度 %    |
|-------|--------|----------|--------|---------|---------|
| 1     | 21.001 | 9919477  | 140151 | 49.777  | 52.847  |
| 2     | 25.880 | 10008340 | 125051 | 50.223  | 47.153  |
| Total |        | 19927817 | 265202 | 100.000 | 100.000 |

Chiral HPLC analysis of **5** from asymmetric reaction.

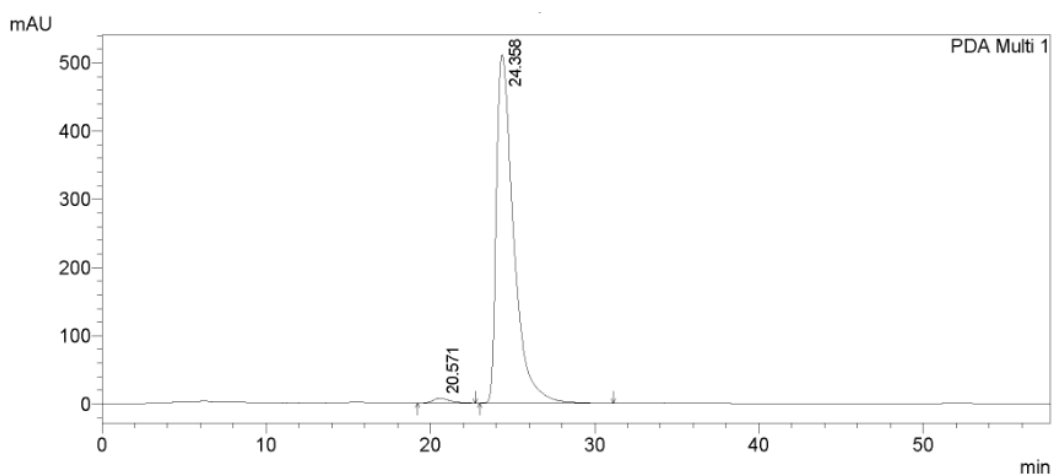

1 PDA Multi 1/254nm 4nm

峰表

| 峰#    | 保留时间   | 面积       | 高度     | 面积 %    | 高度 %    |
|-------|--------|----------|--------|---------|---------|
| 1     | 20.571 | 486696   | 7019   | 1.295   | 1.357   |
| 2     | 24.368 | 37103414 | 510337 | 98.705  | 98.643  |
| Total |        | 37590110 | 517356 | 100.000 | 100.000 |

## 7. The X-ray molecular structure of compounds (2*S*, 11*bS*)-2b

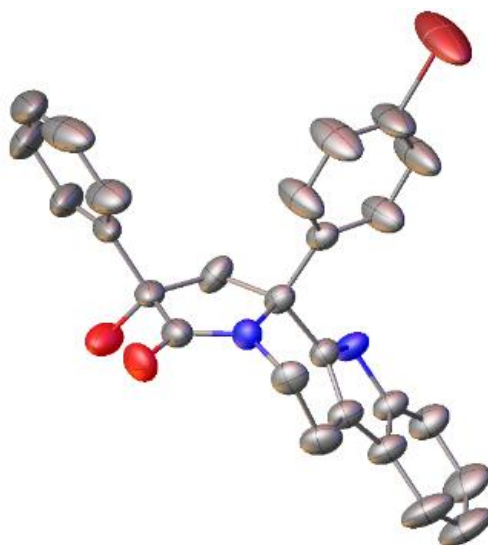

**Figure S2.** The structure of compound **2b**

### 7.1 Crystallographic data and structure refinement of (2*S*, 11*bS*)-2b

|                     |                                                                                                     |
|---------------------|-----------------------------------------------------------------------------------------------------|
| Identification code | xxm-02                                                                                              |
| Empirical formula   | C <sub>30</sub> H <sub>29</sub> BrN <sub>2</sub> O <sub>4</sub>                                     |
| Formula weight      | 561.46                                                                                              |
| Temperature         | 173.00(10) K                                                                                        |
| Wavelength          | 1.54184 Å                                                                                           |
| Crystal system      | Monoclinic                                                                                          |
| Space group         | P 1 21 1                                                                                            |
| Unit cell dimen     | a = 9.9350 (2) Å α = 90.00 °<br>b = 12.0944 (2) Å β = 110.004 (2)°<br>c = 12.1297 (2) Å γ = 90.00 ° |
| Volumn              | 1369.55 (5) Å <sup>3</sup>                                                                          |
| Z                   | 2                                                                                                   |
| Crystal size        | 0.15 x 0.11 x 0.08 mm <sup>3</sup>                                                                  |
| CCDC Number         | 2026743                                                                                             |

## 8. References

- [1] (a) L. Yang, D.-X. Wang, Z.-T. Huang and M.-X. Wang, *J. Am. Chem. Soc.* **2009**, *131*, 10390. (b) S. Tong, D.-X. Wang, L. Zhao, J. Zhu, M.-X. Wang, *Angew. Chem. Int. Ed.* **2012**, *51*, 4417; *Angew. Chem.* **2012**, *124*, 4493.
- [2] (a) L. He, L. Zhao, D.-X. Wang, M.-X. Wang, *Org. Lett.* **2014**, *16*, 5972. (ba) S. Tong, X. Yang, D.-X. Wang, L. Zhao, J. Zhu, M.-X. Wang, *Tetrahedron* **2012**, *68*, 6492. (c) L. Yang, G. Deng, D.-X. Wang, Z.-T. Huang, J. Zhu, M.-X. Wang, *Org. Lett.* **2007**, *9*, 1387.

## 9. Copies of <sup>1</sup>H NMR and <sup>13</sup>C NMR Spectra of Products

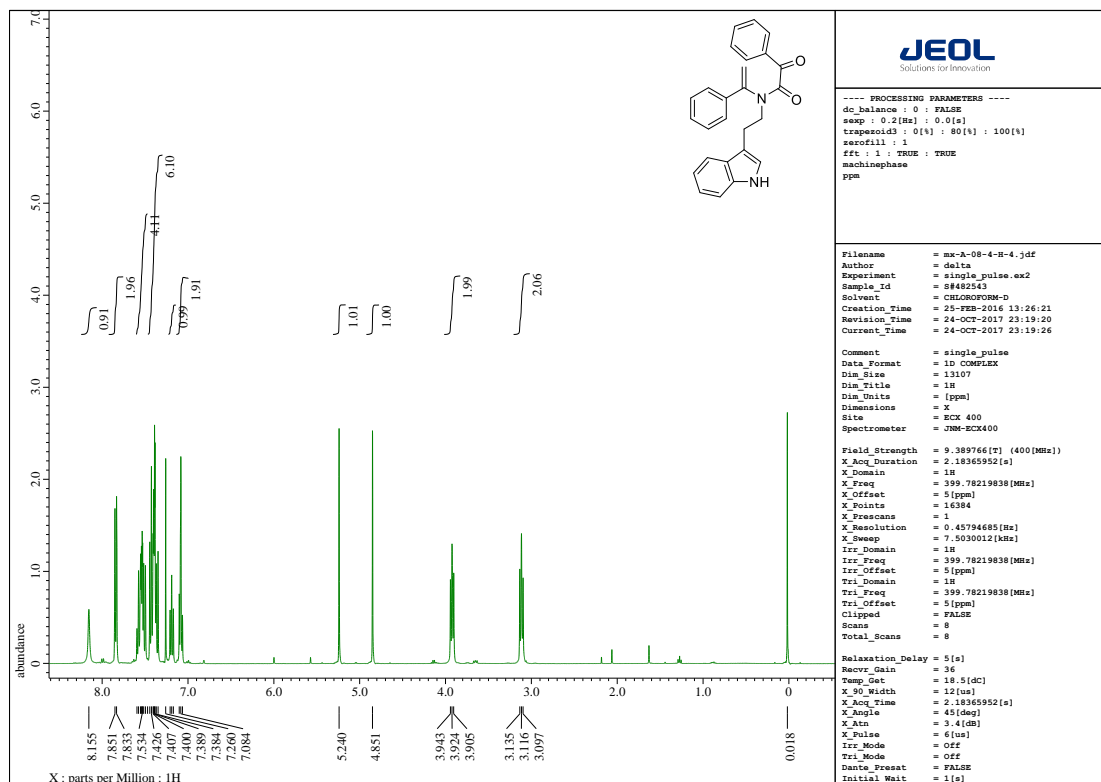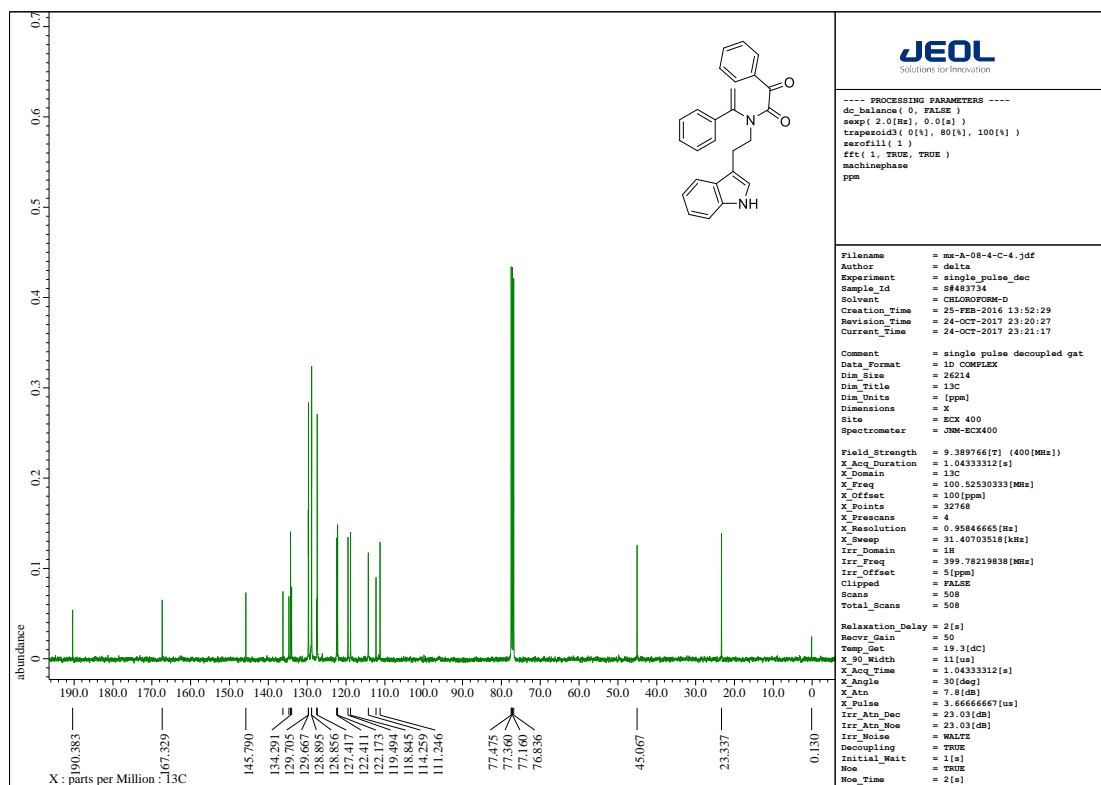



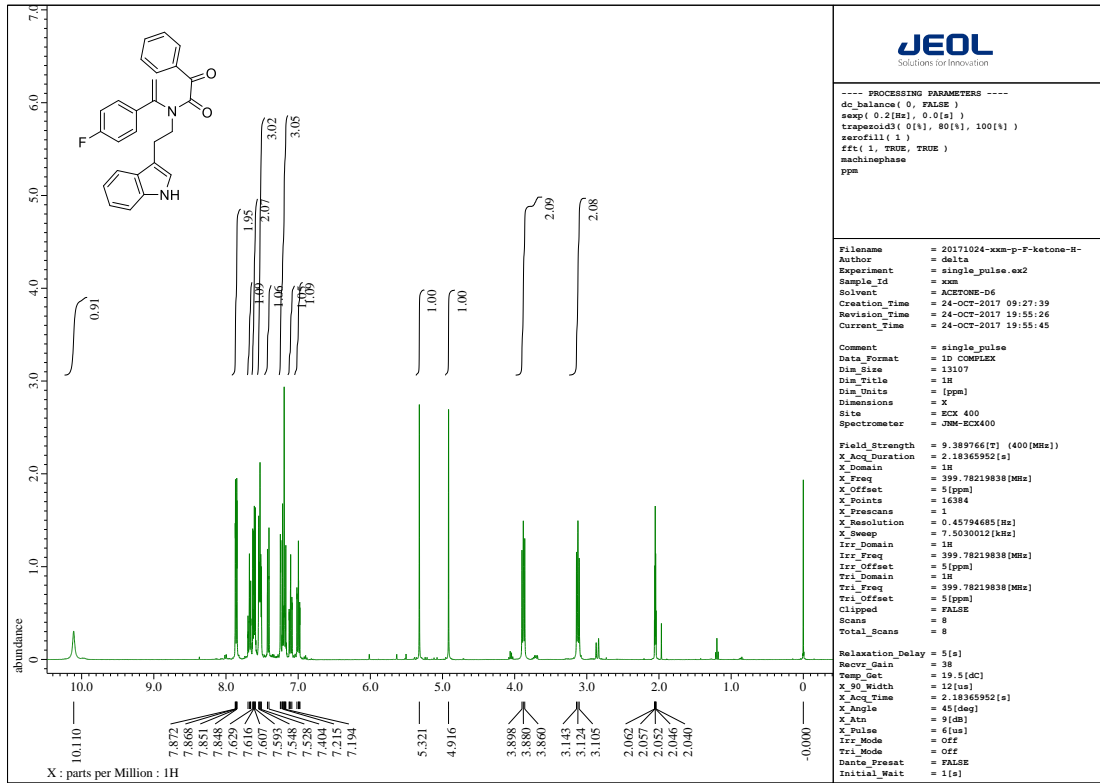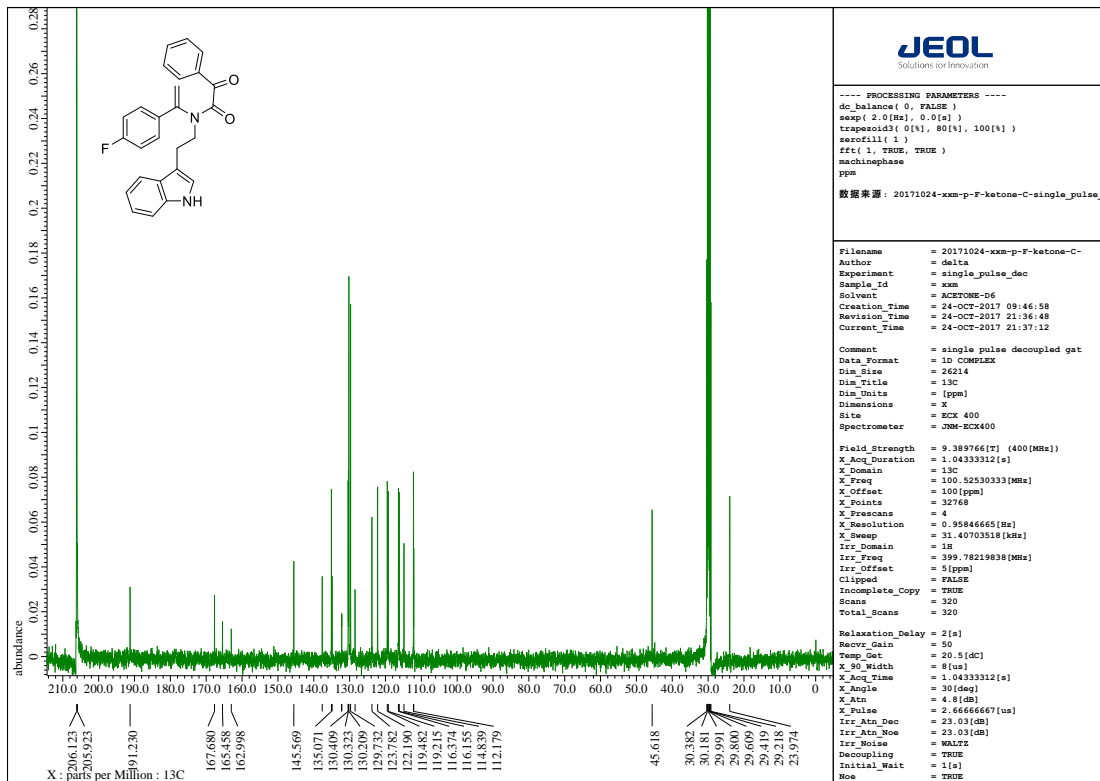



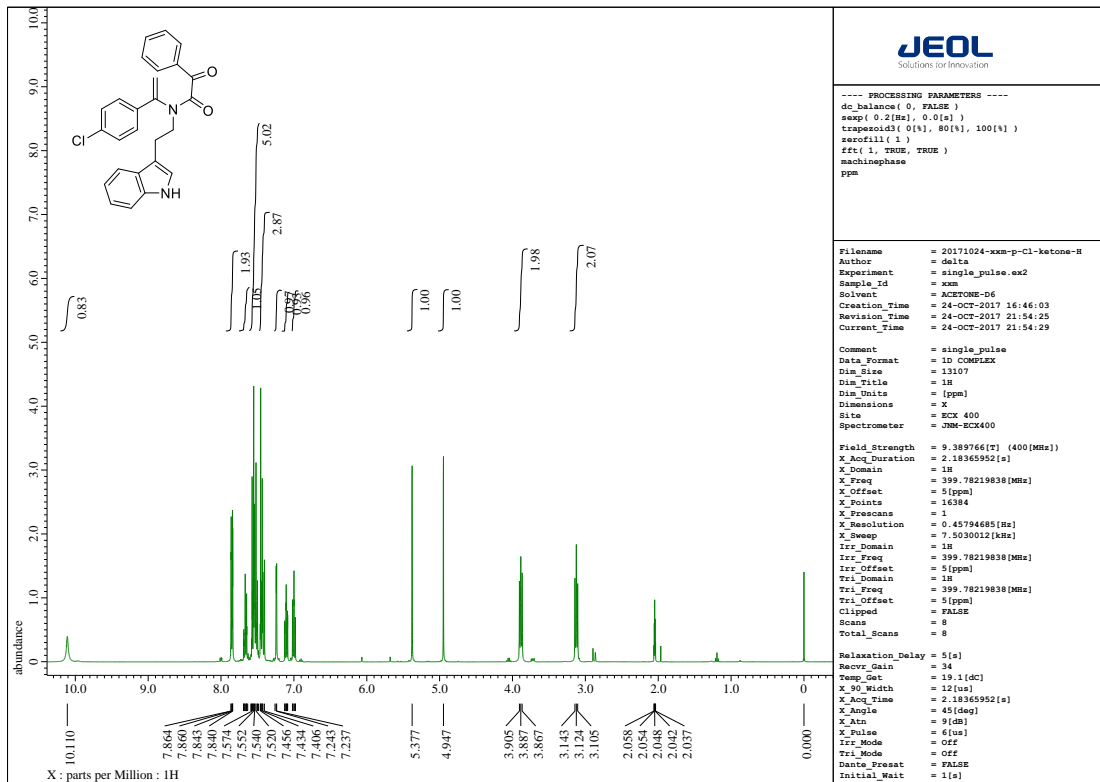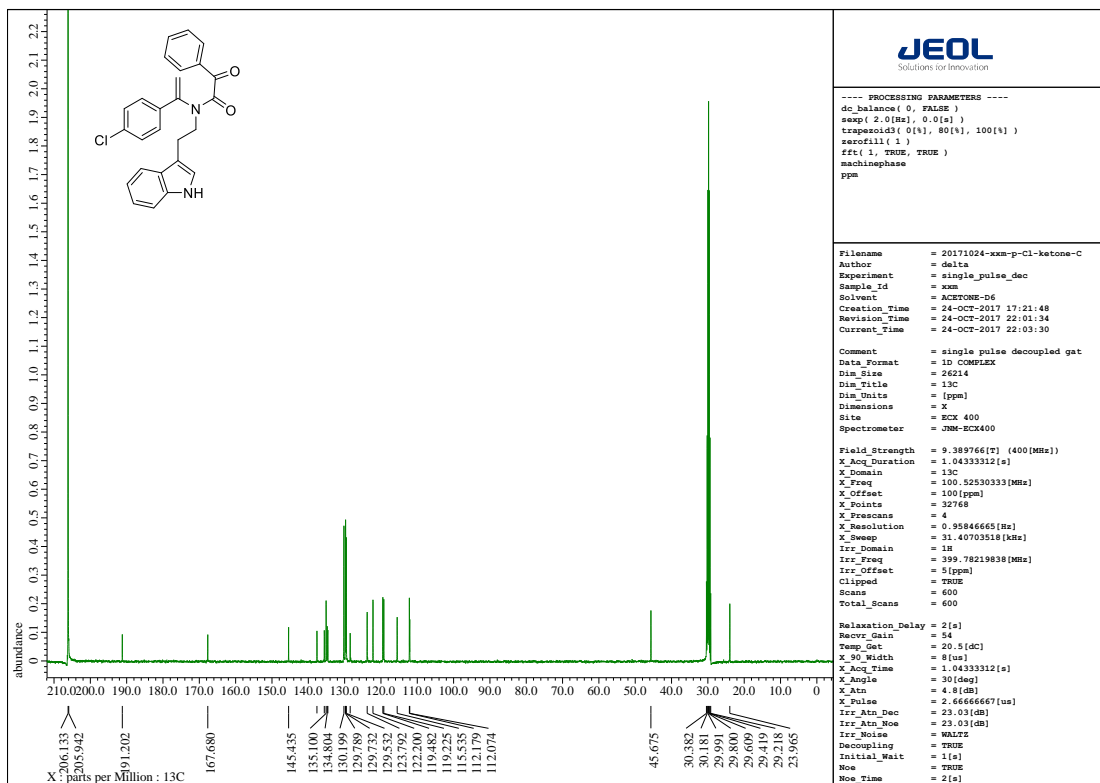

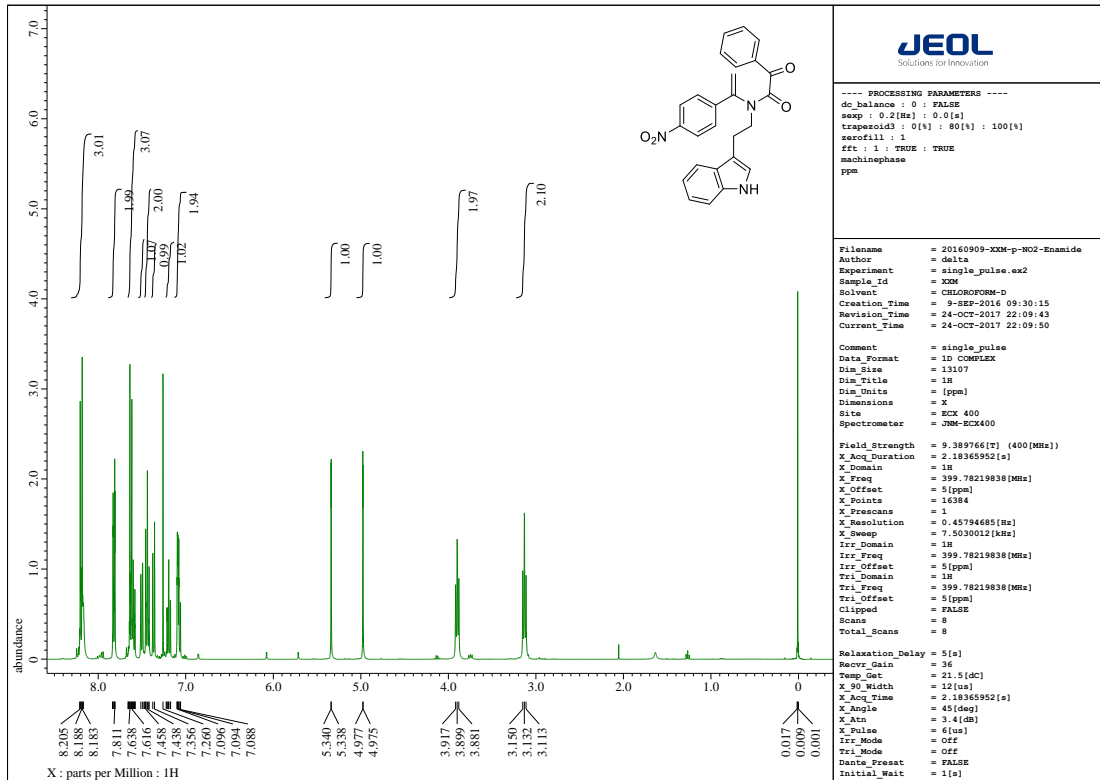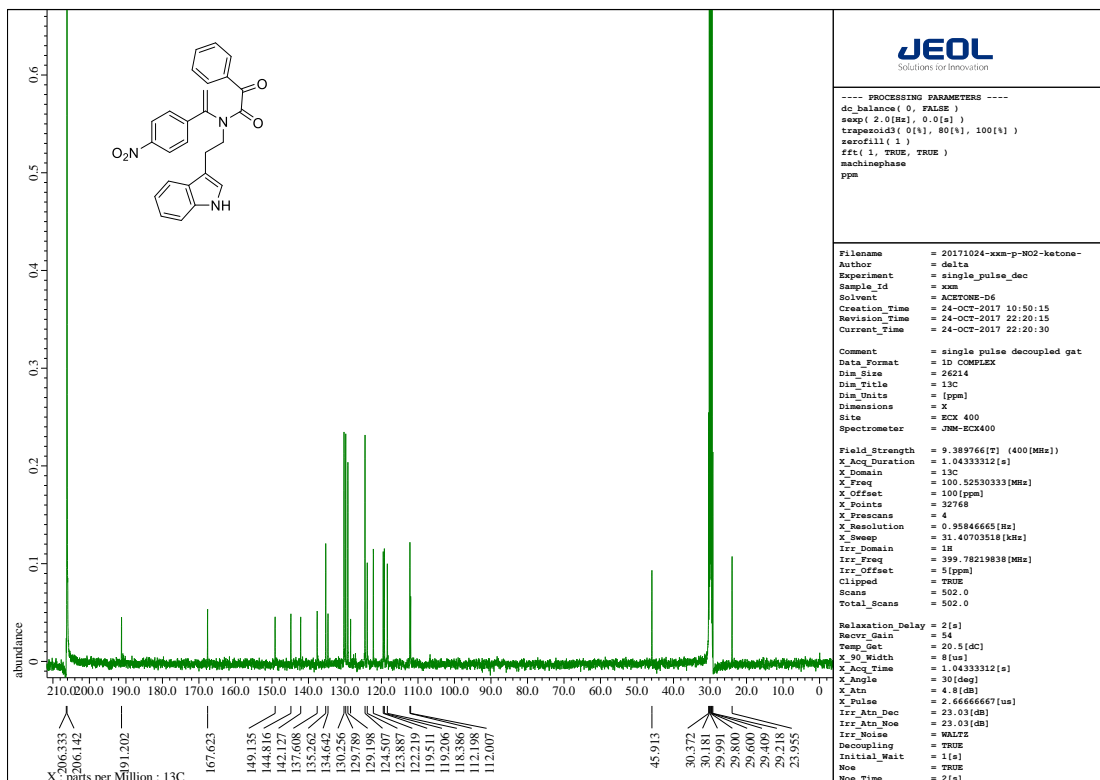

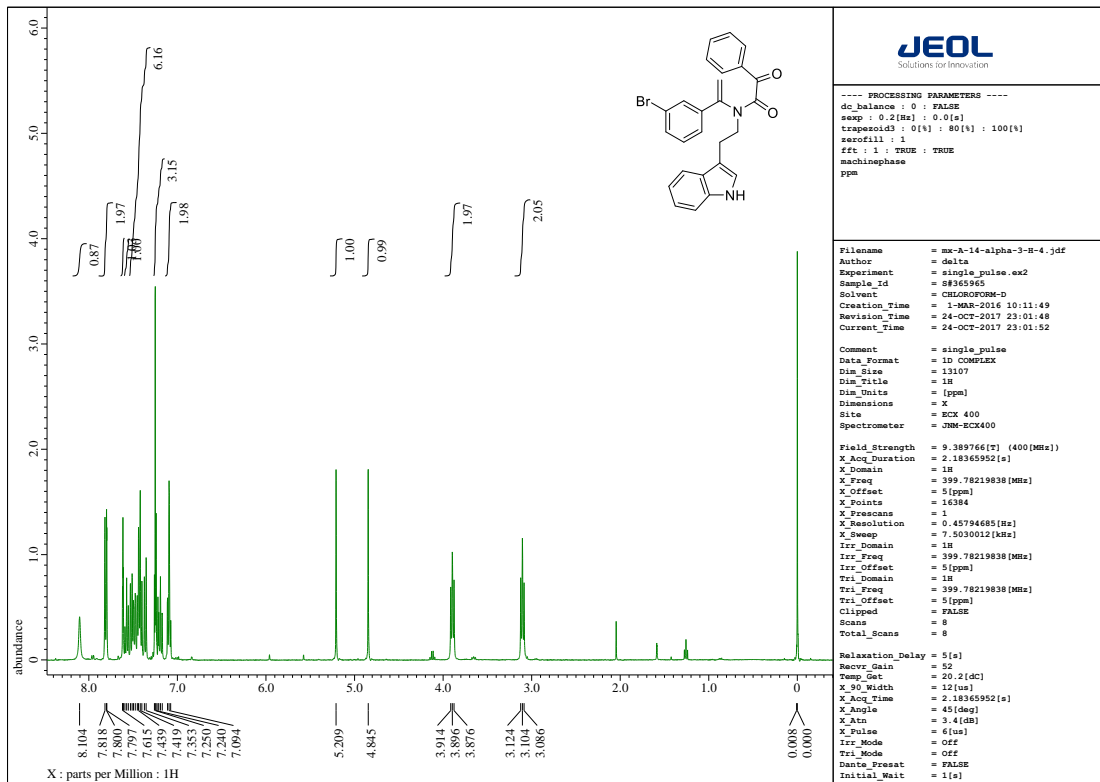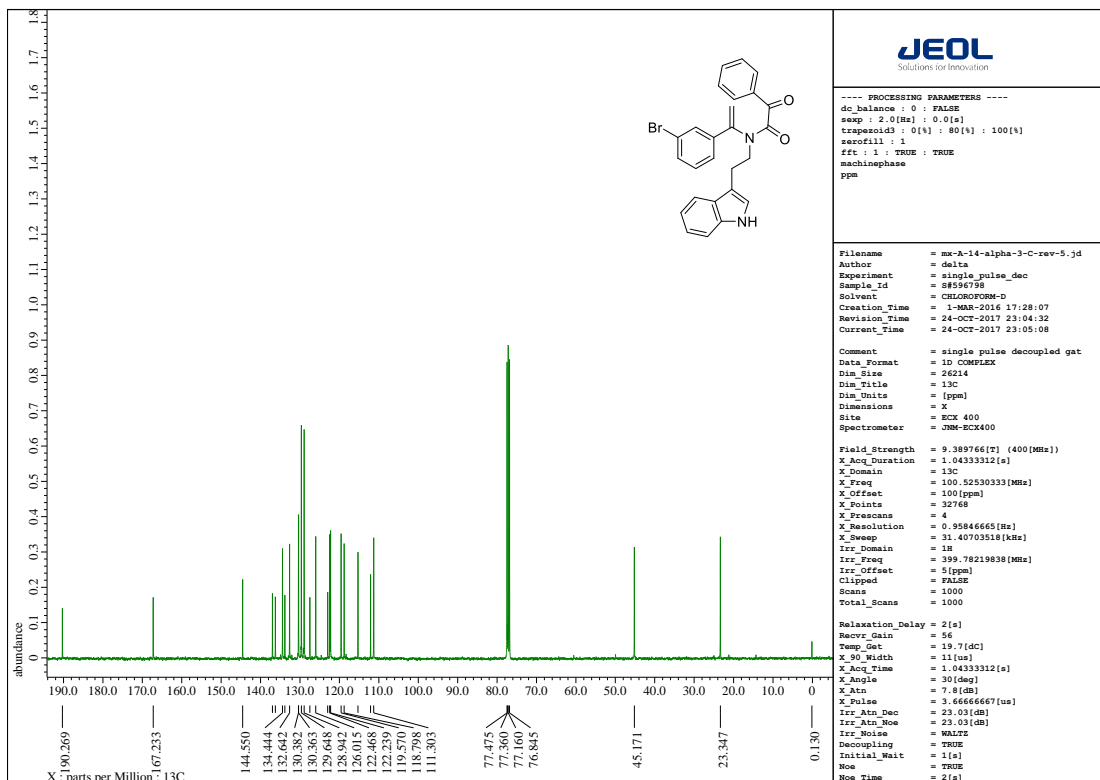

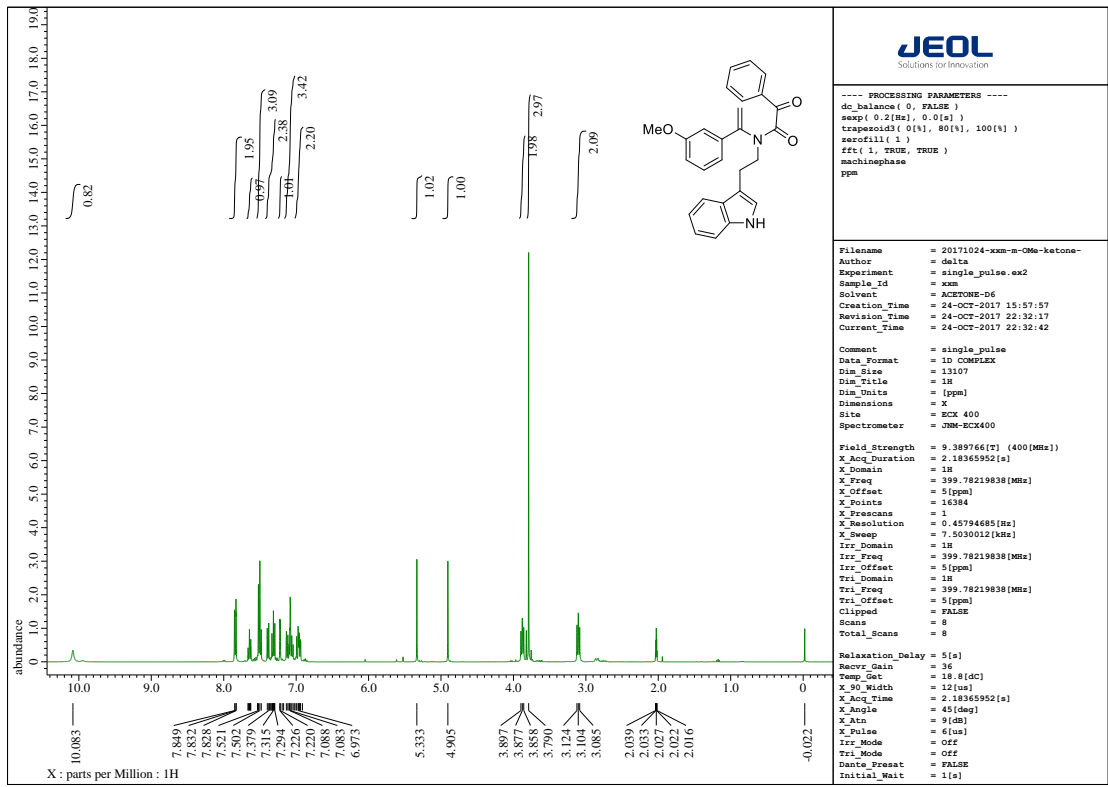

**JEOL**  
Solutions for Innovation

----- PROCESSING PARAMETERS -----  
 dc\_balance ( 0, FALSE )  
 exp( 0.2[Hz], 0.0[s] )  
 trapezoid( 0(1), 80(1), 100(1) )  
 zerofill( 1 )  
 fft( 1, TRUE, TRUE )  
 machinephase  
 ppm

Filename = 20171024-xxm-m-OMe-ketona-  
 Author = delta  
 Experiment = single\_pulse.ex2  
 Sample\_Id = xxm  
 Solvent = ACETONE-d6  
 Creation\_Time = 24-OCT-2017 15:57:57  
 Revision\_Time = 24-OCT-2017 22:32:17  
 Current\_Time = 24-OCT-2017 22:32:42

Comment = single\_pulse  
 Data\_Format = 1D\_COMPLEX  
 Dim\_Size = 13107  
 Dim\_Title = 1H  
 Dim\_Units = [ppm]  
 Dimensions = X  
 Site = ECX 400  
 Spectrometer = JNM-ECX400

Field\_Strength = 9.389766[T] (400[MHz])  
 X\_Acq\_Duration = 2.18365952[s]  
 X\_Domain = 1H  
 X\_Freq = 399.78219838[MHz]  
 X\_Offset = 5[ppm]  
 X\_Points = 16384  
 X\_Prescans = 1  
 X\_Resolution = 0.45794685[Hz]  
 X\_Sweep = 7.5030012[kHz]  
 Irr\_Domain = 1H  
 Irr\_Freq = 399.78219838[MHz]  
 Irr\_Offset = 5[ppm]  
 Tri\_Domain = 1H  
 Tri\_Freq = 399.78219838[MHz]  
 Tri\_Offset = 5[ppm]  
 Clipped = FALSE  
 Scans = 8  
 Total\_Scans = 8

Relaxation\_Delay = 5[s]  
 Recvr\_Gain = 36  
 Temp\_Set = 18.0[degC]  
 X\_90\_Width = 12[us]  
 X\_Acq\_Time = 2.18365952[s]  
 X\_Angle = 45[deg]  
 X\_Atn = 9[db]  
 X\_Pulse = 6[us]  
 Irr\_Mode = Off  
 Tri\_Mode = Off  
 Dante\_Preset = FALSE  
 Initial\_Wait = 1[s]

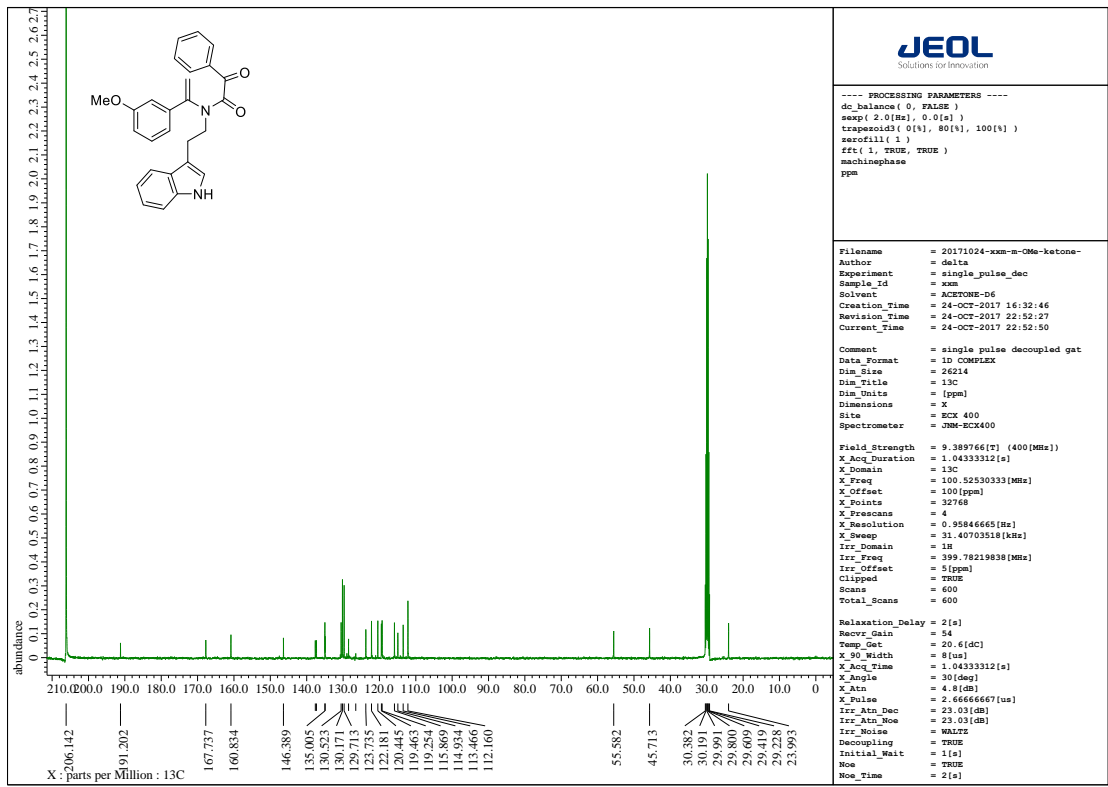

**JEOL**  
Solutions for Innovation

----- PROCESSING PARAMETERS -----  
 dc\_balance ( 0, FALSE )  
 exp( 2.0[Hz], 0.0[s] )  
 trapezoid( 0(1), 80(1), 100(1) )  
 zerofill( 1 )  
 fft( 1, TRUE, TRUE )  
 machinephase  
 ppm

Filename = 20171024-xxm-m-OMe-ketona-  
 Author = delta  
 Experiment = single\_pulse\_dec  
 Sample\_Id = xxm  
 Solvent = ACETONE-d6  
 Creation\_Time = 24-OCT-2017 16:32:46  
 Revision\_Time = 24-OCT-2017 22:52:27  
 Current\_Time = 24-OCT-2017 22:52:50

Comment = single pulse decoupled gat  
 Data\_Format = 1D\_COMPLEX  
 Dim\_Size = 26214  
 Dim\_Title = 13C  
 Dim\_Units = [ppm]  
 Dimensions = X  
 Site = ECX 400  
 Spectrometer = JNM-ECX400

Field\_Strength = 9.389766[T] (400[MHz])  
 X\_Acq\_Duration = 1.04333312[s]  
 X\_Domain = 13C  
 X\_Freq = 100.52503333[MHz]  
 X\_Offset = 100[ppm]  
 X\_Points = 52768  
 X\_Prescans = 4  
 X\_Resolution = 0.95846665[Hz]  
 X\_Sweep = 31.40703518[kHz]  
 Irr\_Domain = 1H  
 Irr\_Freq = 399.78219838[MHz]  
 Irr\_Offset = 5[ppm]  
 Clipped = TRUE  
 Scans = 600  
 Total\_Scans = 600

Relaxation\_Delay = 2[s]  
 Recvr\_Gain = 54  
 Temp\_Set = 20.6[degC]  
 X\_90\_Width = 8[us]  
 X\_Acq\_Time = 1.04333312[s]  
 X\_Angle = 30[deg]  
 X\_Atn = 4.8[db]  
 X\_Pulse = 2.66666667[us]  
 Irr\_Atn\_Dec = 23.03[db]  
 Irr\_Atn\_Moe = 23.03[db]  
 Irr\_Noise = WALTZ  
 Decoupling = TRUE  
 Initial\_Wait = 1[s]  
 Moe = TRUE  
 Moe\_Time = 2[s]

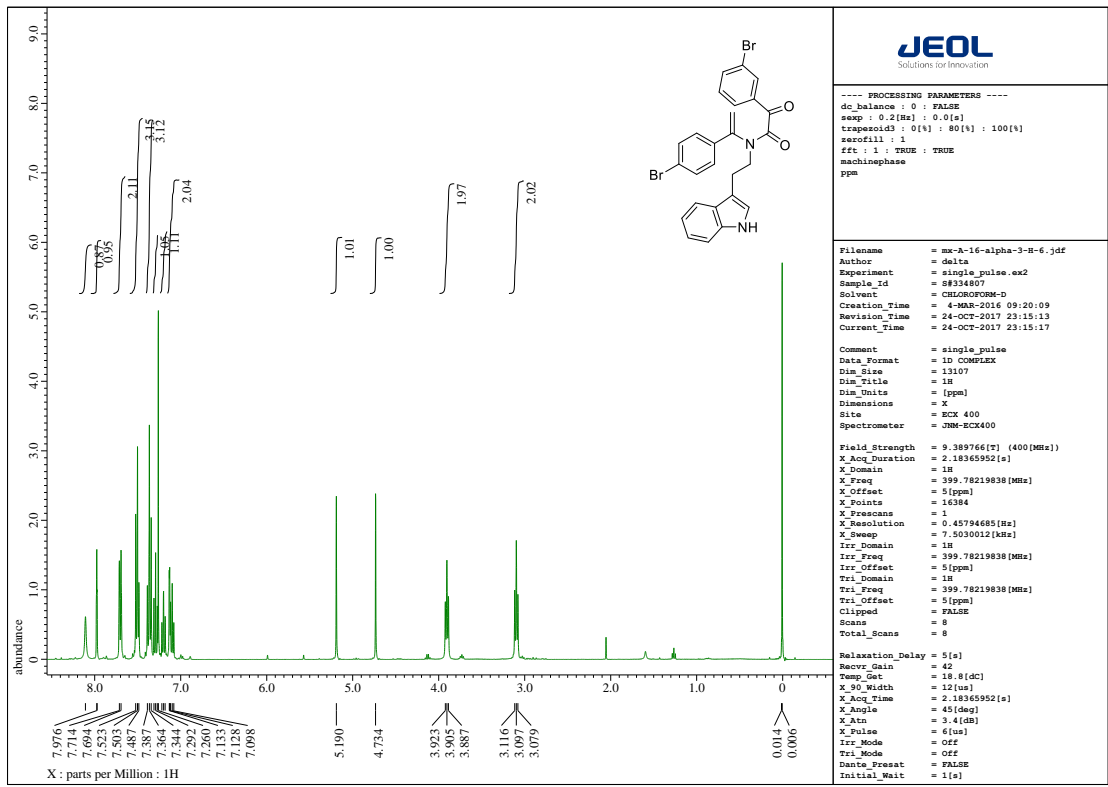

**JEOL**  
Solutions for Innovation

----- PROCESSING PARAMETERS -----  
 dc\_balance : 0 : FALSE  
 exp : 0.2 [Hz] : 0.0 [s]  
 trapecoid : 0 [1] : 80 [1] : 100 [1]  
 zerofill : 1  
 fft : 1 : TRUE : TRUE  
 machinephase  
 ppm

Filename = mx-A-16-alpha-3-H-6.jdf  
 Author = Delta  
 Experiment = single\_pulse\_ex2  
 Sample\_Id = #8334807  
 Solvent = CHLOROFORM-d  
 Creation\_Time = 4-MAR-2016 09:20:09  
 Revision\_Time = 24-OCT-2017 23:15:13  
 Current\_Time = 24-OCT-2017 23:15:17

Comment = single\_pulse  
 Data\_Format = 1D\_COMPLEX  
 Dim\_Size = 13107  
 Dim\_Title = 1H  
 Dim\_Units = [ppm]  
 Dimensions = X  
 Site = ECX 400  
 Spectrometer = JNM-ECX400

Field\_Strength = 9.389766 [T] (400 [MHz])  
 X\_Acq\_Duration = 2.18365952 [s]  
 X\_Domain = 1H  
 X\_Freq = 399.78219838 [MHz]  
 X\_Offset = 5 [ppm]  
 X\_Points = 16384  
 X\_Prescans = 1  
 X\_Resolution = 0.45794685 [Hz]  
 X\_Sweep = 7.5030012 [kHz]  
 Irr\_Domain = 1H  
 Irr\_Freq = 399.78219838 [MHz]  
 Irr\_Offset = 5 [ppm]  
 Tri\_Domain = 1H  
 Tri\_Freq = 399.78219838 [MHz]  
 Tri\_Offset = 5 [ppm]  
 Clipped = FALSE  
 Scans = 8  
 Total\_Scans = 8

Relaxation\_Delay = 5 [s]  
 Recvr\_Gain = 42  
 Temp\_Set = 18.8 [dC]  
 X\_90\_Width = 12 [us]  
 X\_Acq\_Time = 2.18365952 [s]  
 X\_Angle = 45 [deg]  
 X\_Atn = 3.4 [dB]  
 X\_Pulse = 6 [us]  
 Irr\_Mode = OFF  
 Tri\_Mode = OFF  
 Dante\_Preset = FALSE  
 Initial\_Wait = 1 [s]

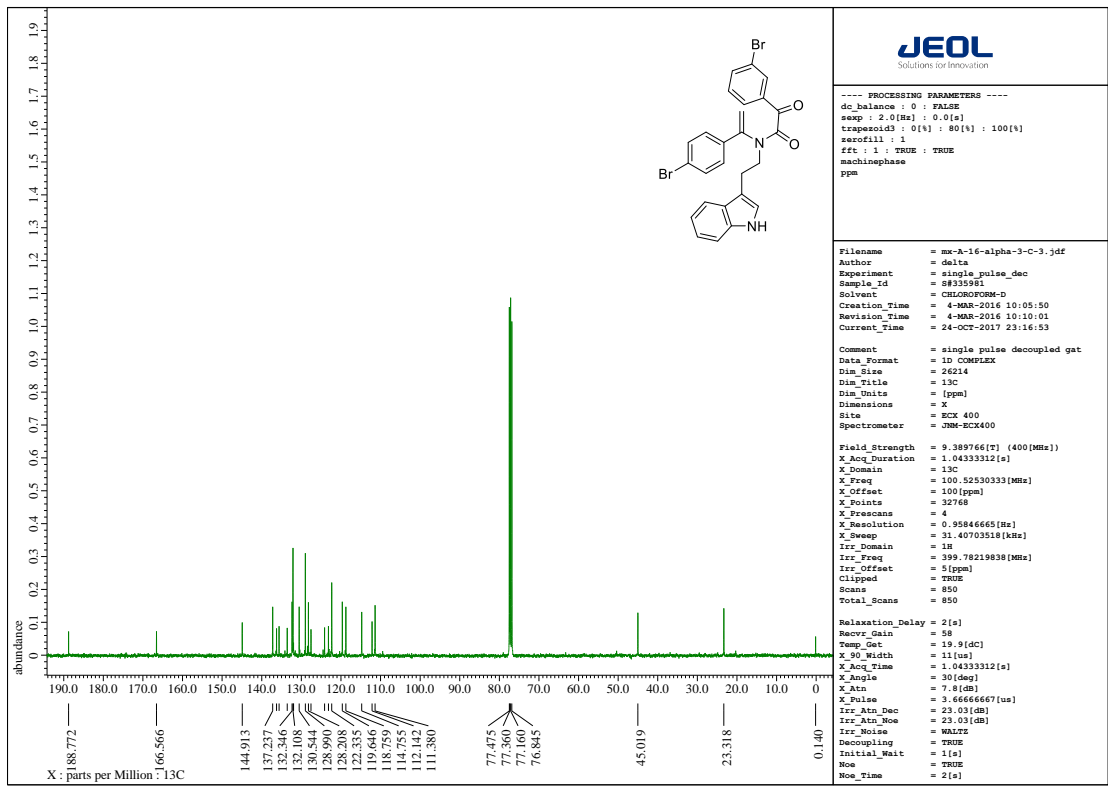

**JEOL**  
Solutions for Innovation

----- PROCESSING PARAMETERS -----  
 dc\_balance : 0 : FALSE  
 exp : 2.0 [Hz] : 0.0 [s]  
 trapecoid : 0 [1] : 80 [1] : 100 [1]  
 zerofill : 1  
 fft : 1 : TRUE : TRUE  
 machinephase  
 ppm

Filename = mx-A-16-alpha-3-C-3.jdf  
 Author = Delta  
 Experiment = single\_pulse\_dec  
 Sample\_Id = #8335981  
 Solvent = CHLOROFORM-d  
 Creation\_Time = 4-MAR-2016 10:05:50  
 Revision\_Time = 4-MAR-2016 10:10:01  
 Current\_Time = 24-OCT-2017 23:16:53

Comment = single\_pulse\_decoupled\_gat  
 Data\_Format = 1D\_COMPLEX  
 Dim\_Size = 26214  
 Dim\_Title = 13C  
 Dim\_Units = [ppm]  
 Dimensions = X  
 Site = ECX 400  
 Spectrometer = JNM-ECX400

Field\_Strength = 9.389766 [T] (400 [MHz])  
 X\_Acq\_Duration = 1.04333312 [s]  
 X\_Domain = 13C  
 X\_Freq = 100.52530333 [MHz]  
 X\_Offset = 100 [ppm]  
 X\_Points = 52768  
 X\_Prescans = 4  
 X\_Resolution = 0.95846665 [Hz]  
 X\_Sweep = 31.40703518 [kHz]  
 Irr\_Domain = 1H  
 Irr\_Freq = 399.78219838 [MHz]  
 Irr\_Offset = 5 [ppm]  
 Clipped = TRUE  
 Scans = 850  
 Total\_Scans = 850

Relaxation\_Delay = 2 [s]  
 Recvr\_Gain = 58  
 Temp\_Set = 19.9 [dC]  
 X\_90\_Width = 11 [us]  
 X\_Acq\_Time = 1.04333312 [s]  
 X\_Angle = 30 [deg]  
 X\_Atn = 7.8 [dB]  
 X\_Pulse = 3.66666667 [us]  
 Irr\_Atn\_Dec = 23.03 [dB]  
 Irr\_Atn\_Moe = 23.03 [dB]  
 Irr\_Noise = WALTZ  
 Decoupling = TRUE  
 Initial\_Wait = 1 [s]  
 Moe = TRUE  
 Noe\_Time = 2 [s]

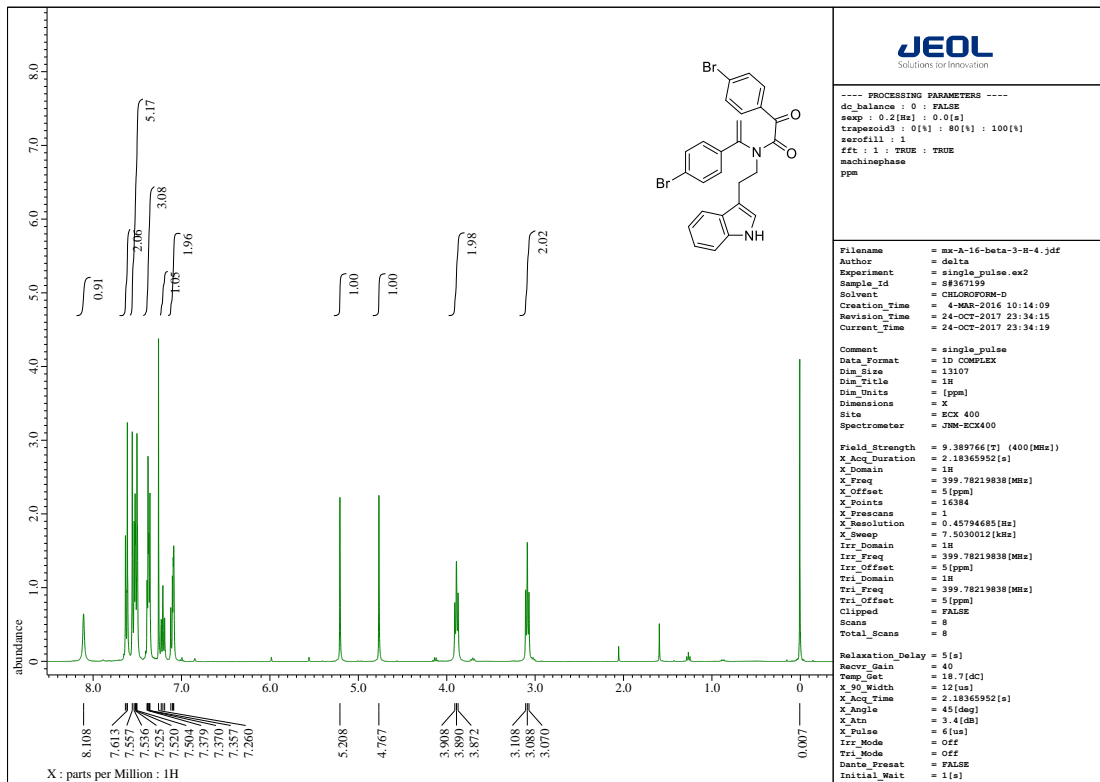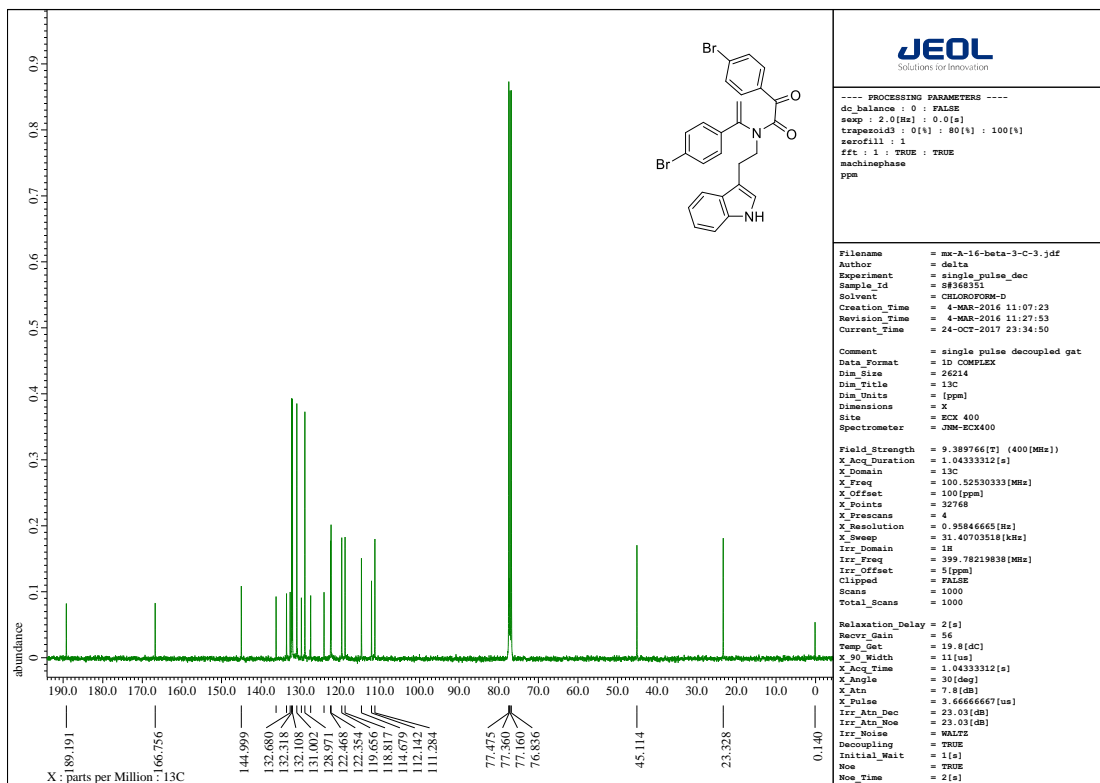

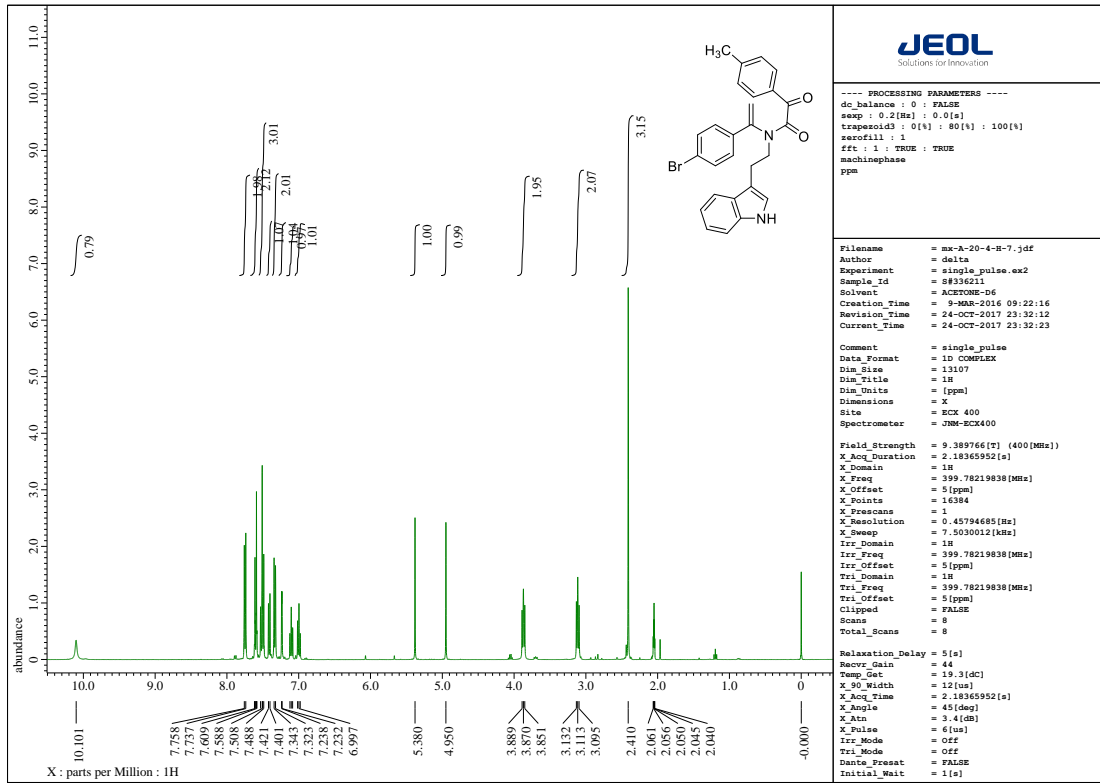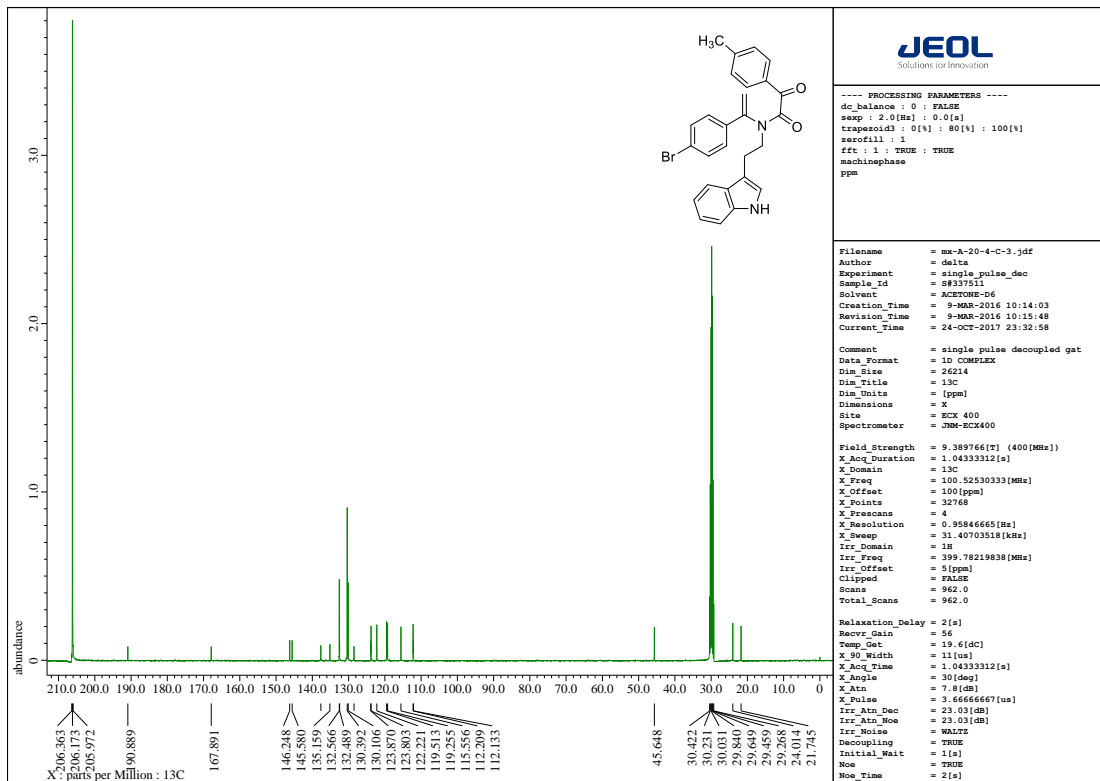

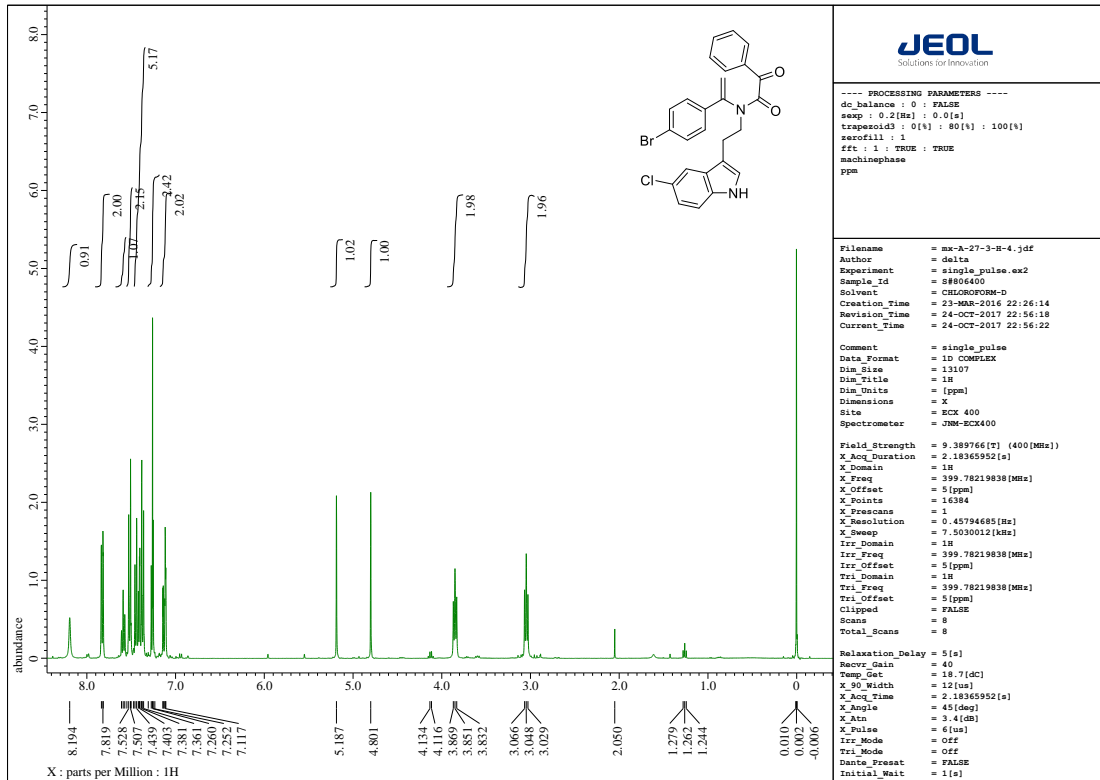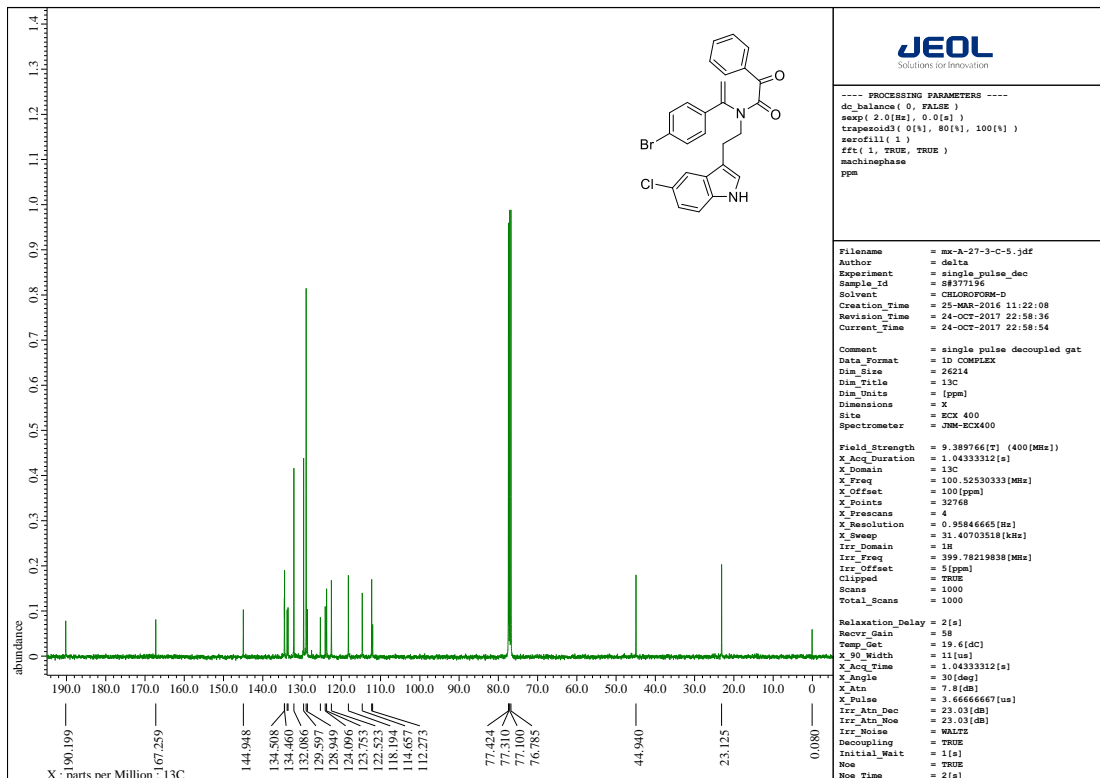



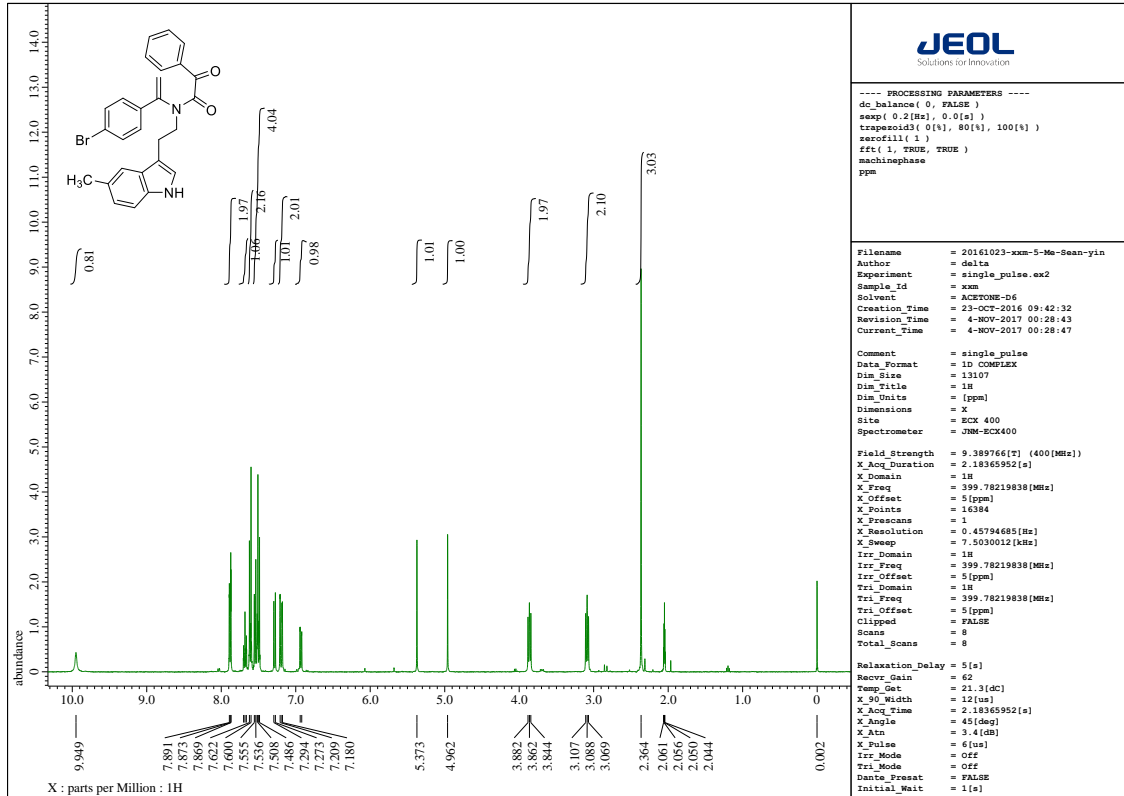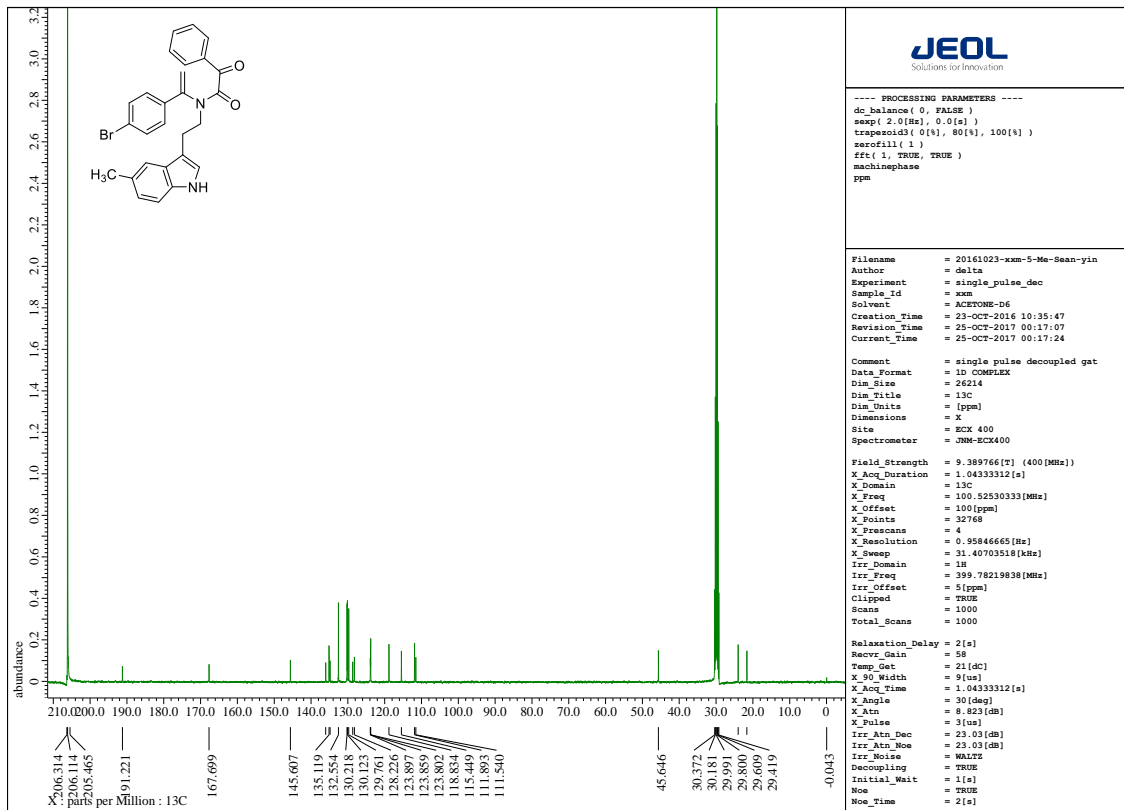

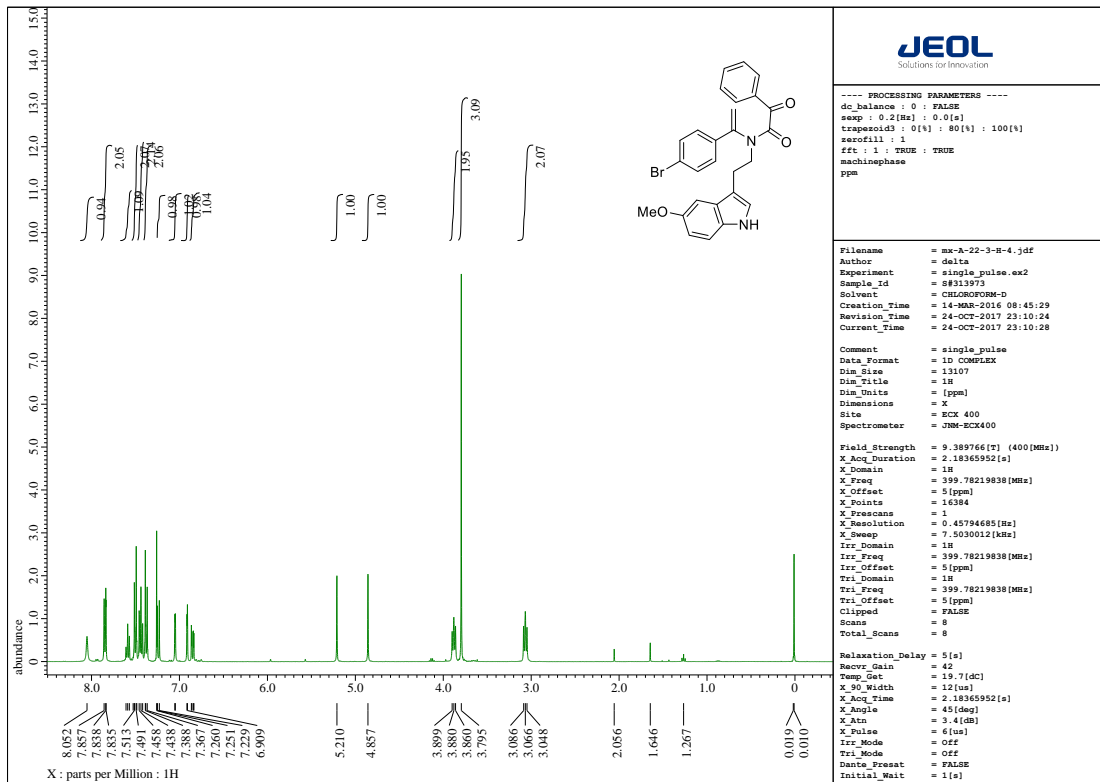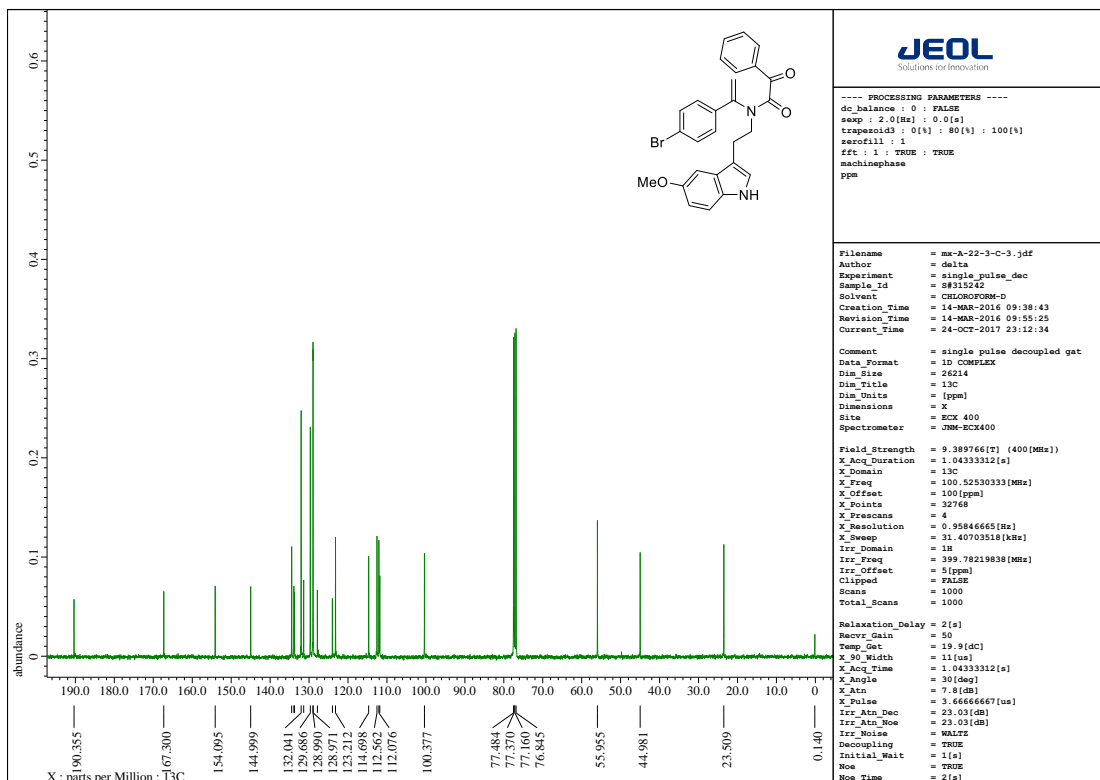

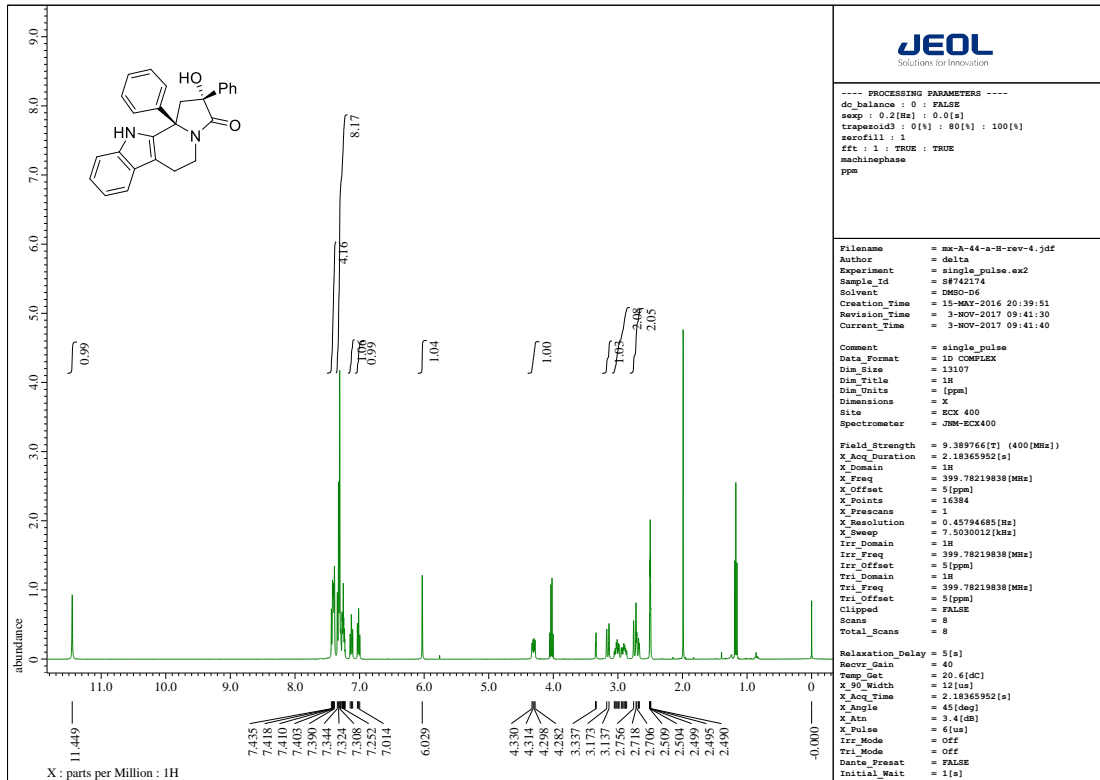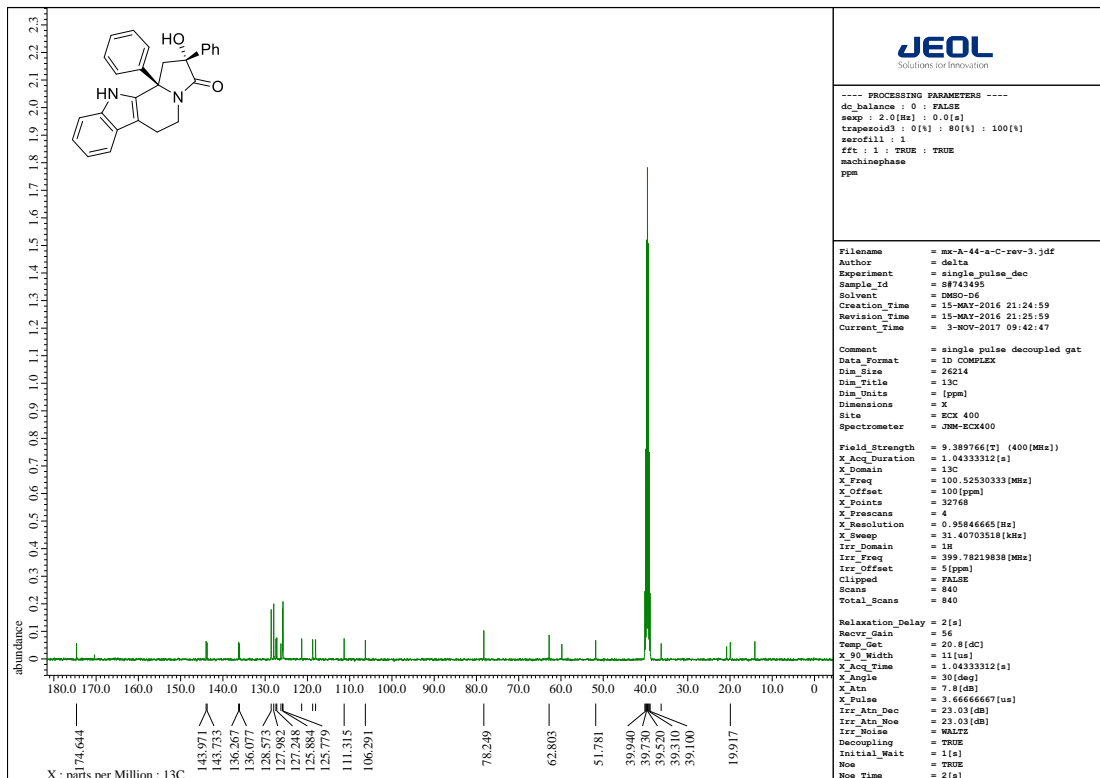



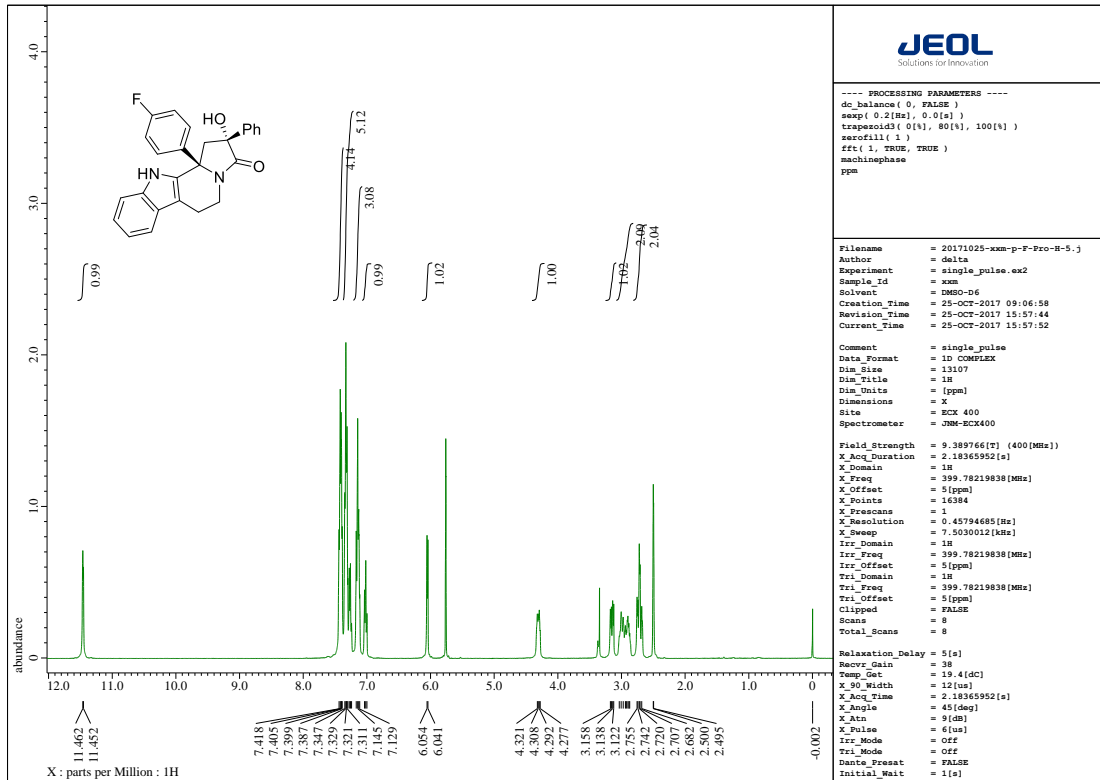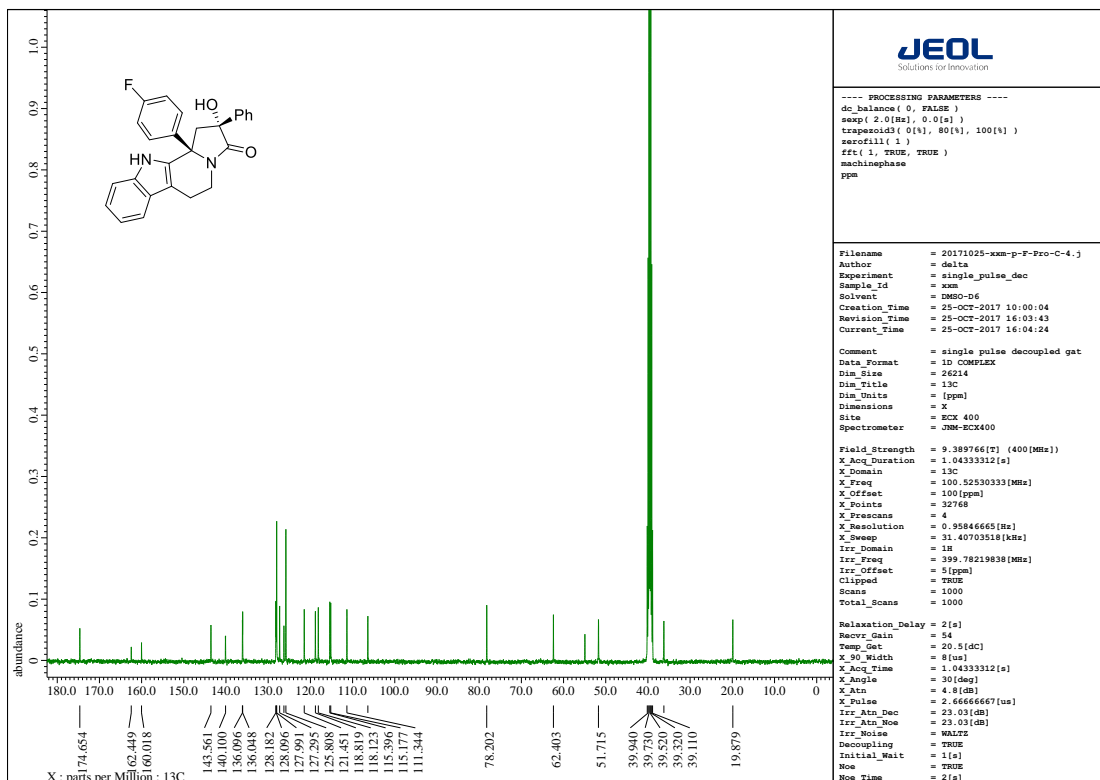

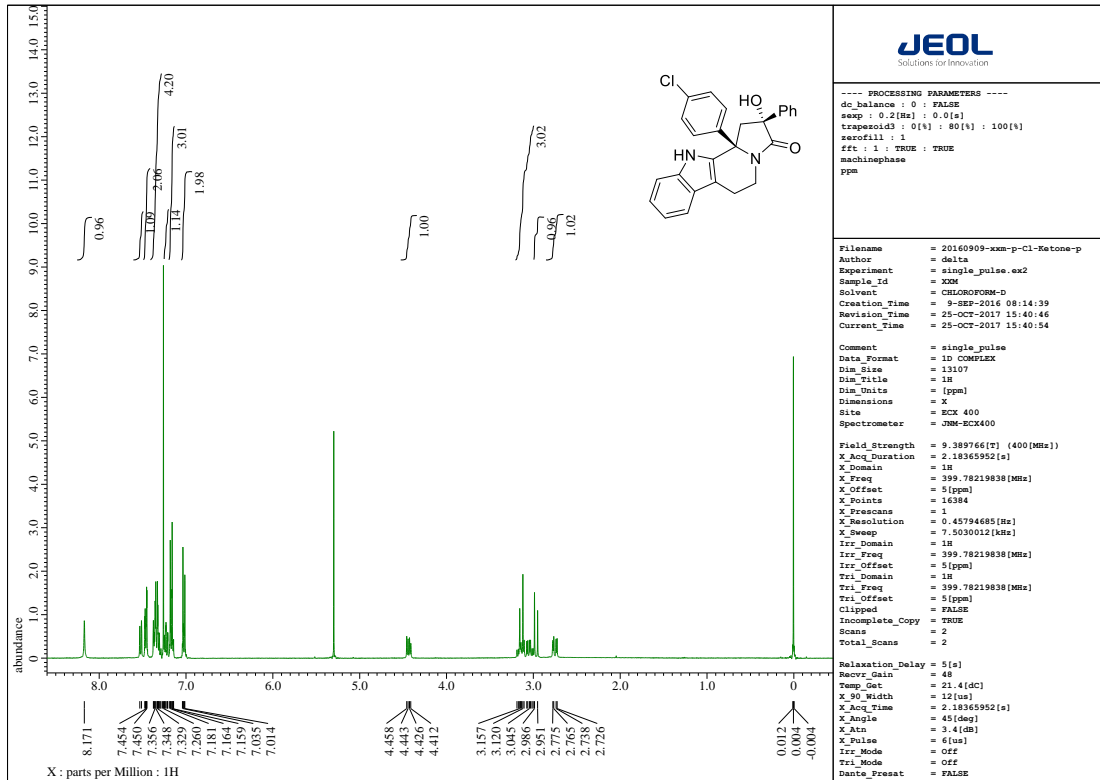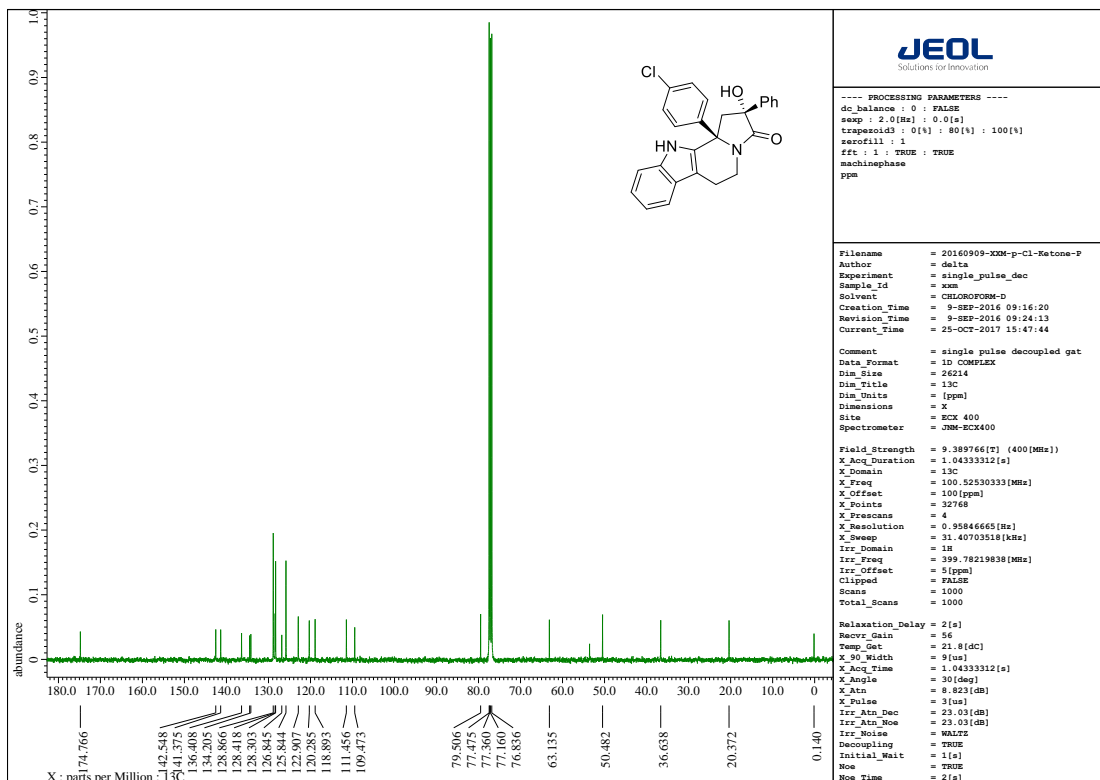

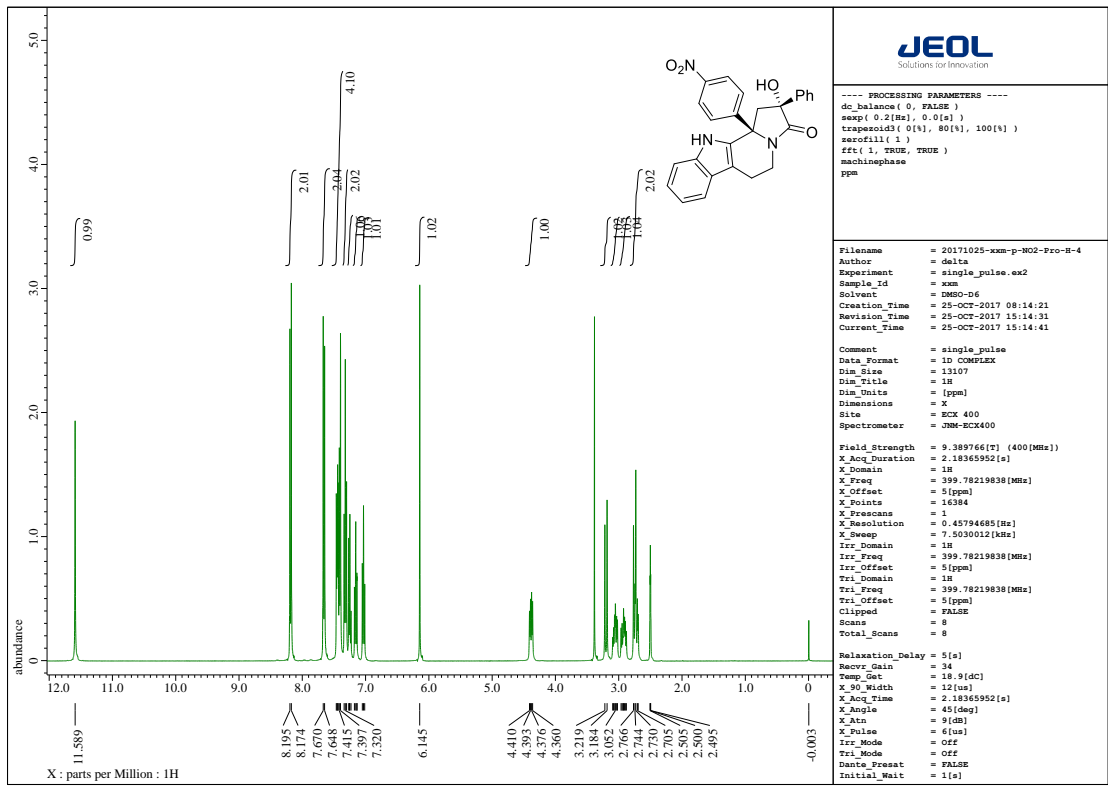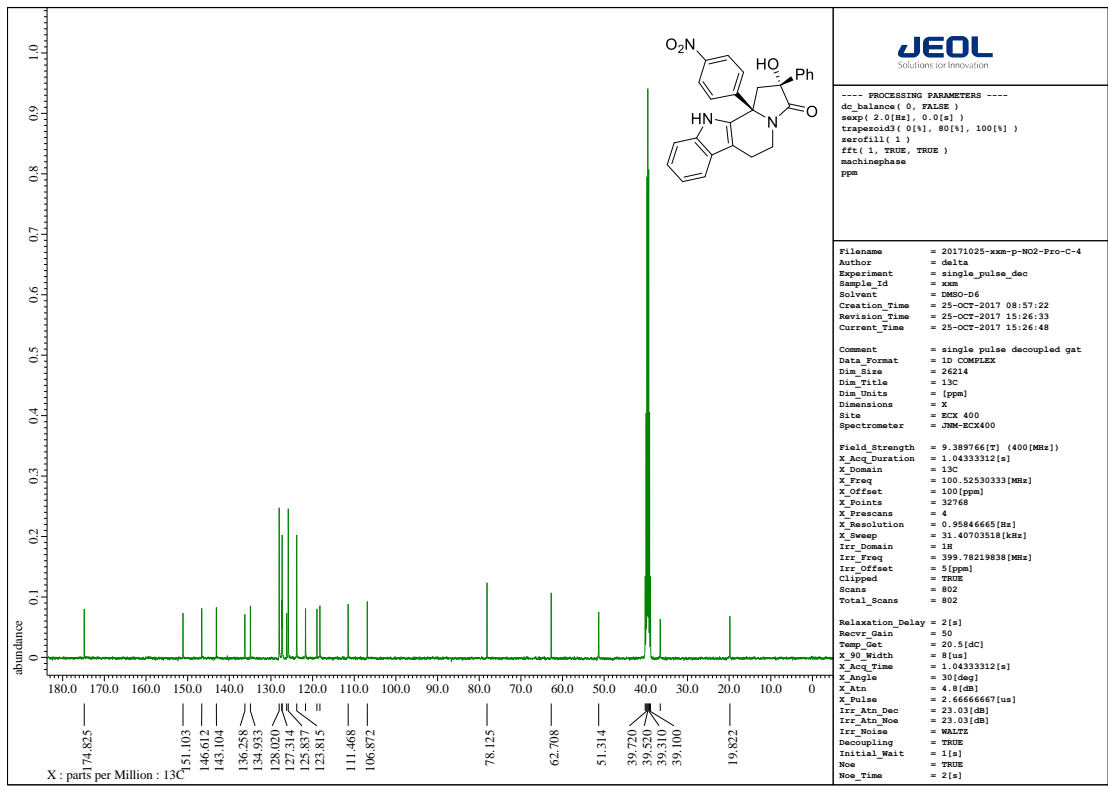

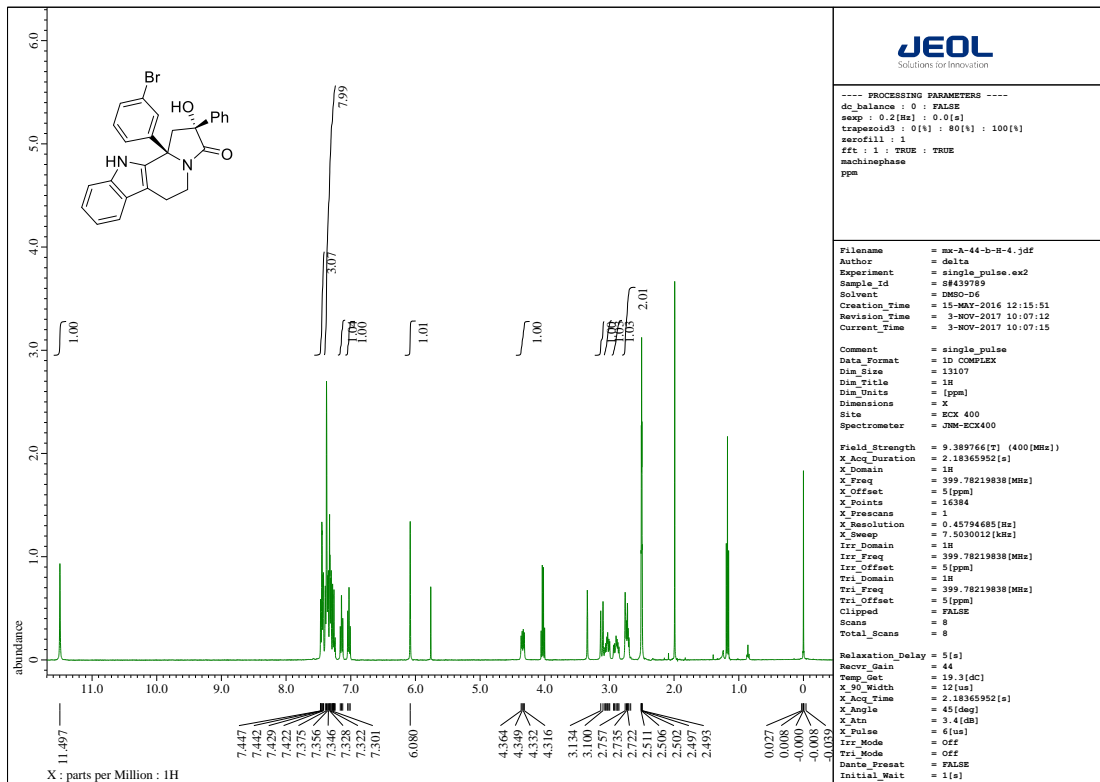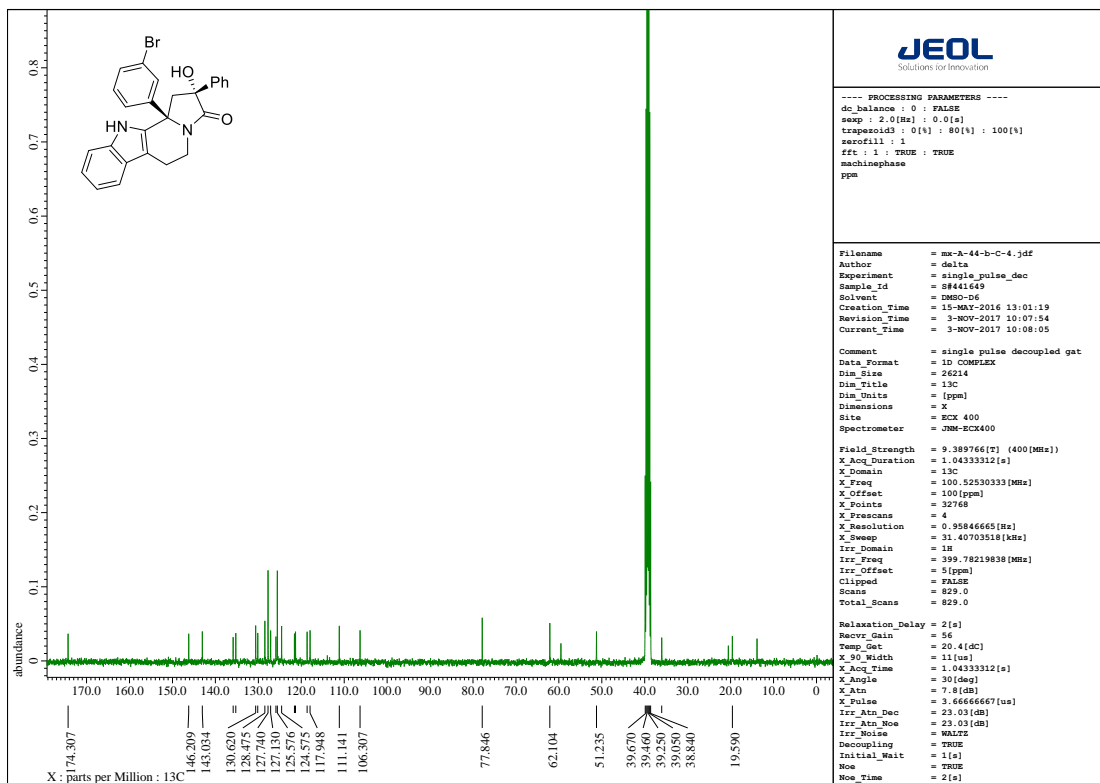



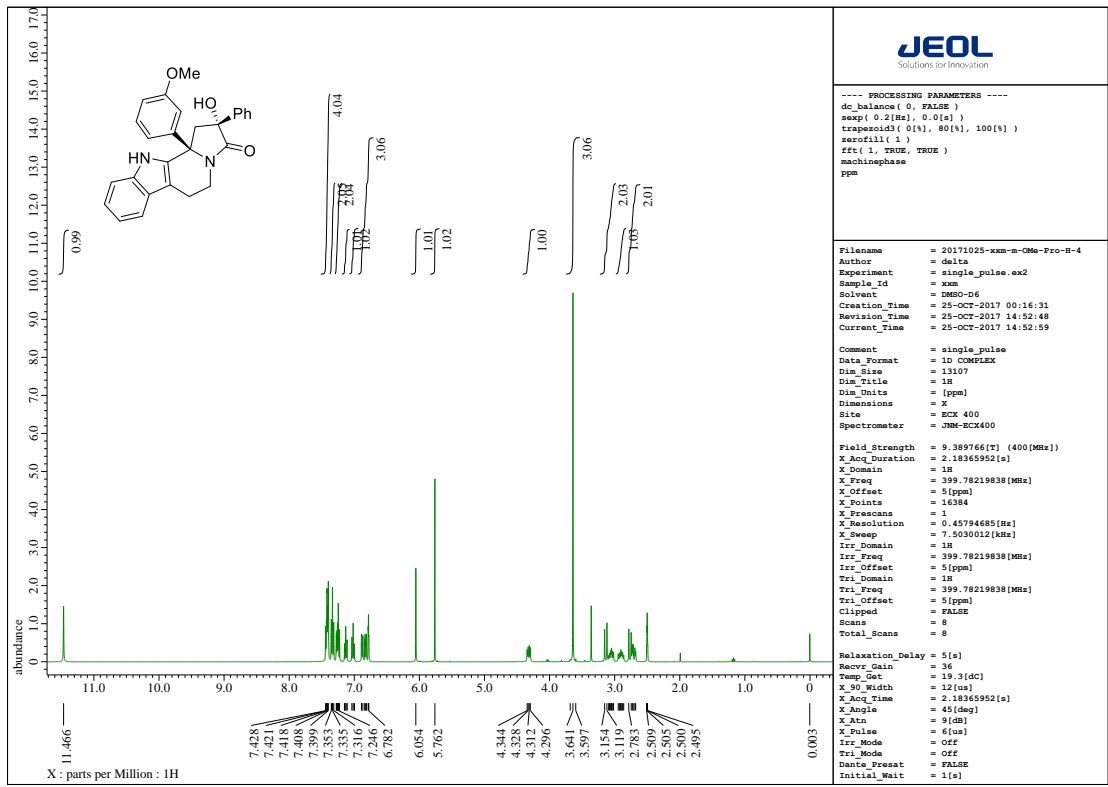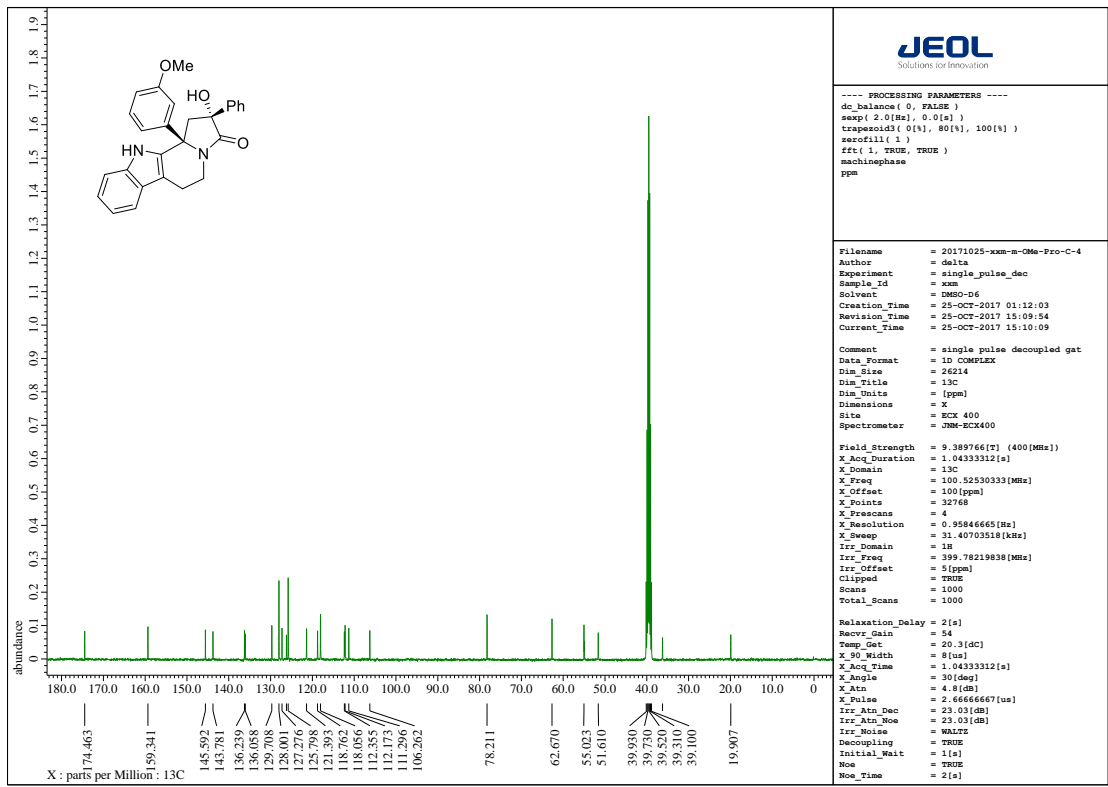

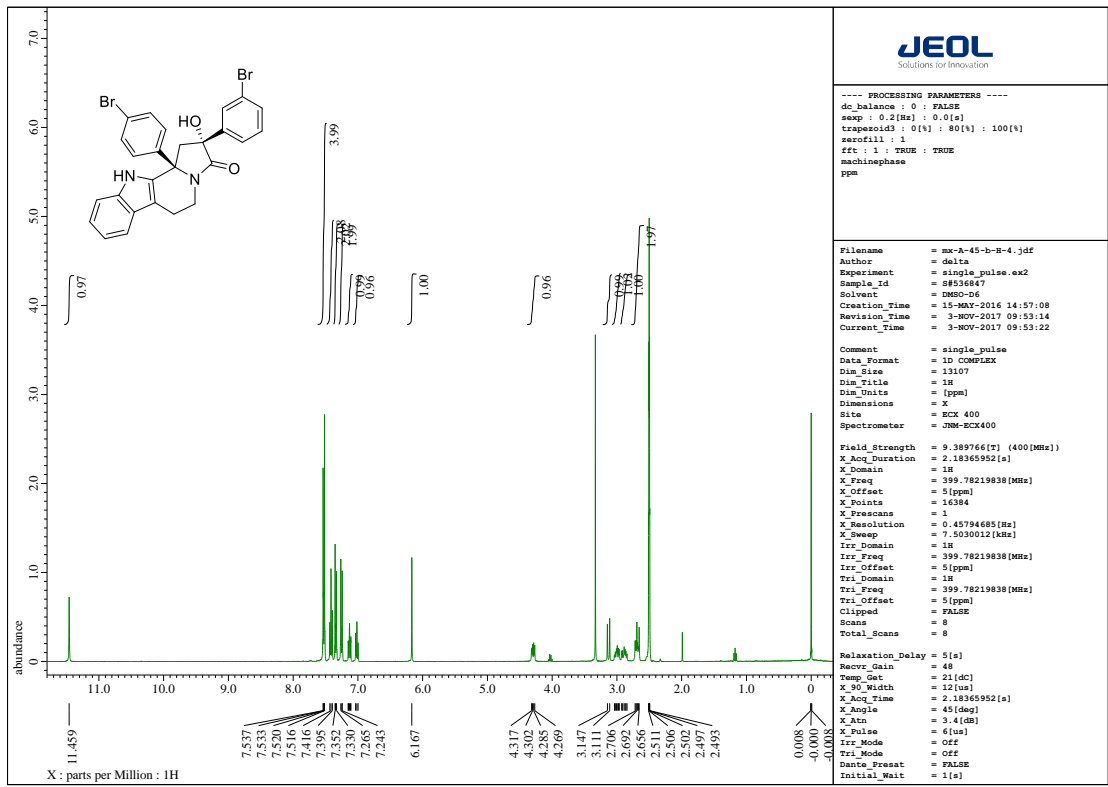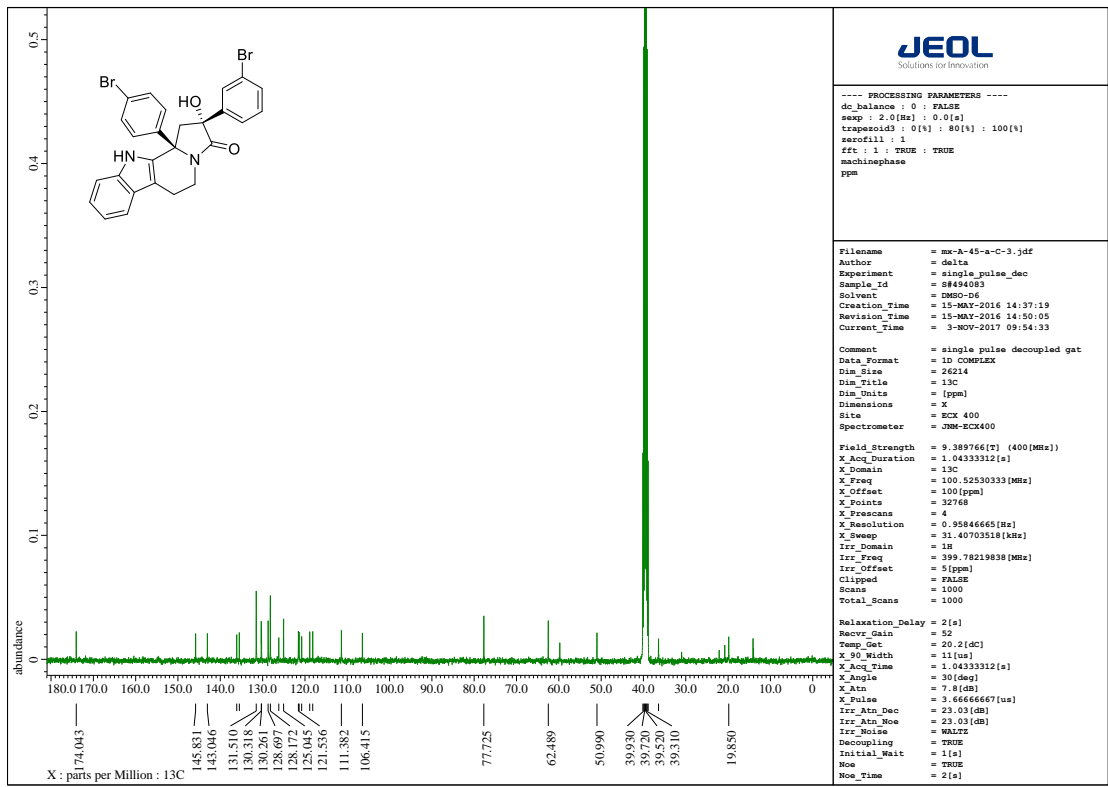

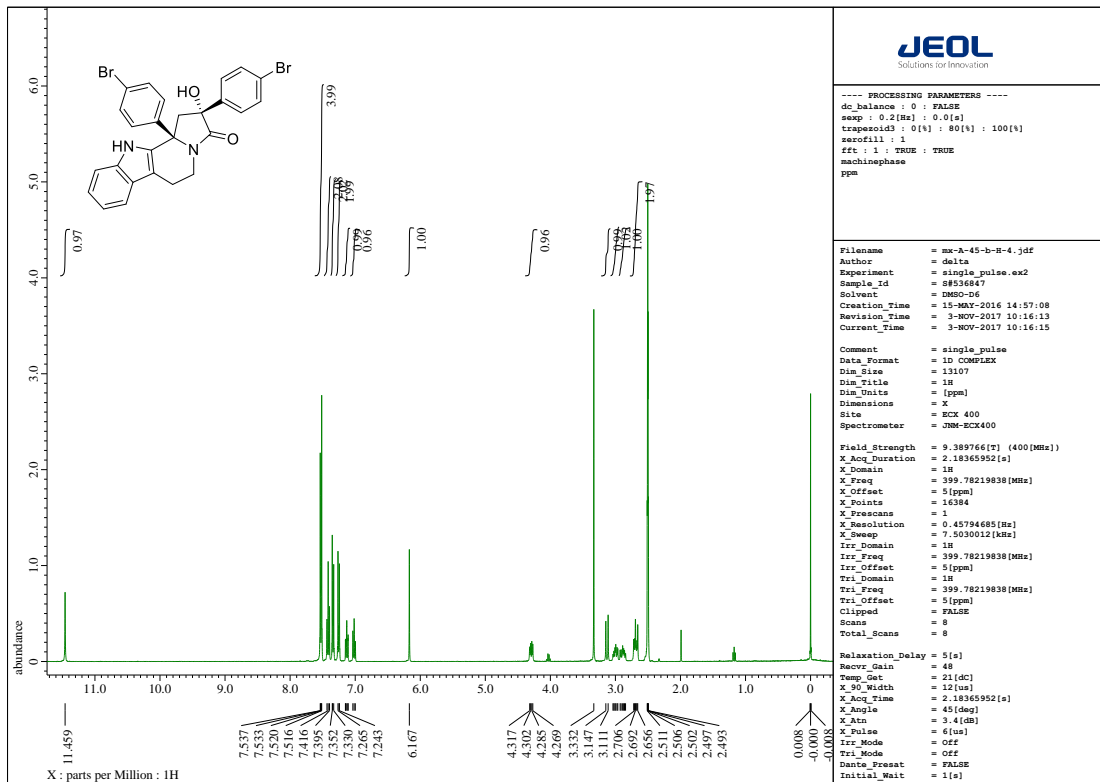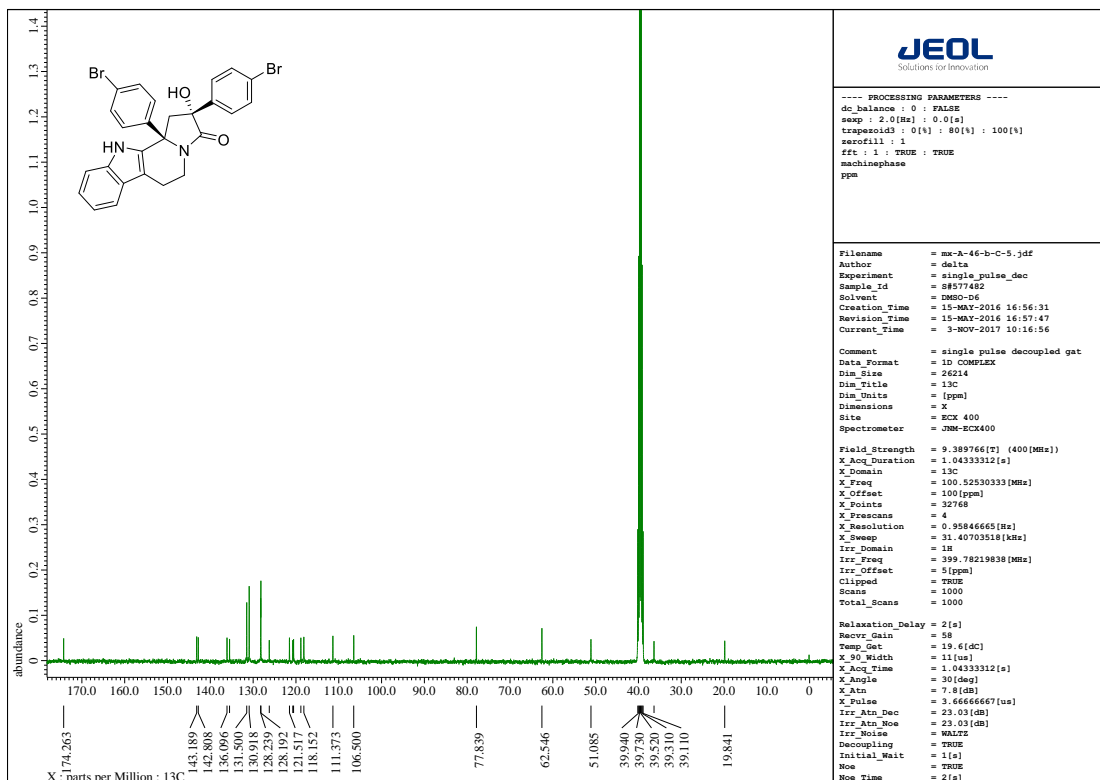

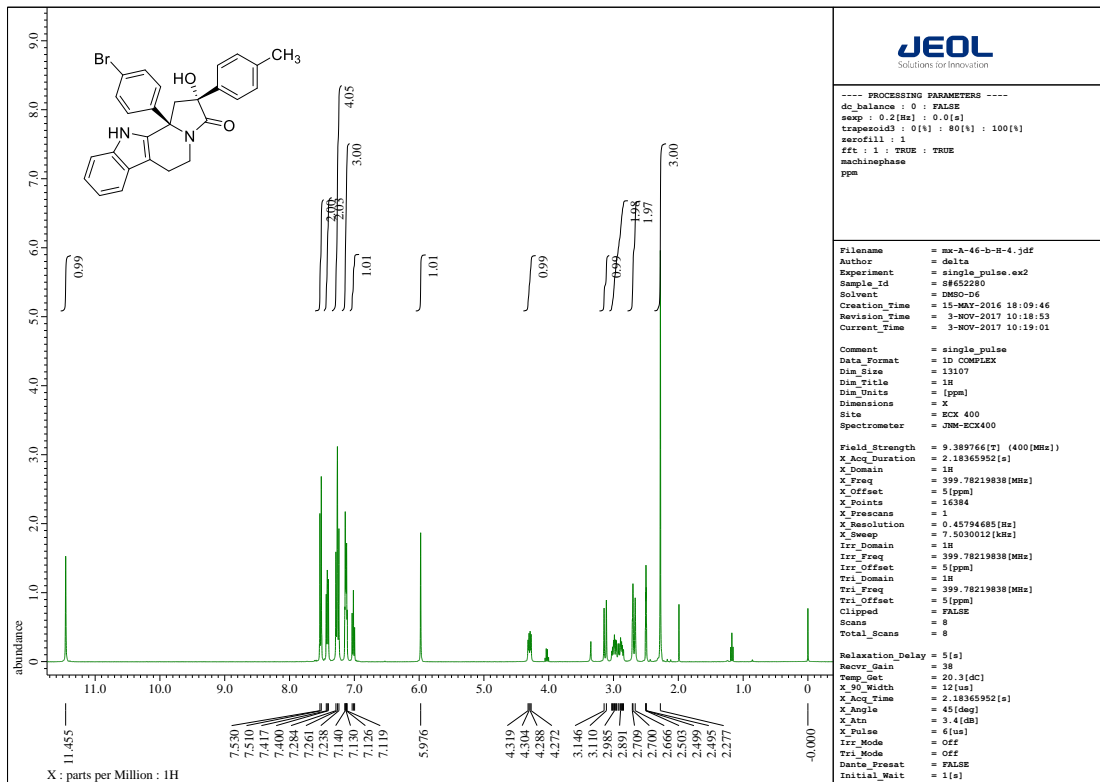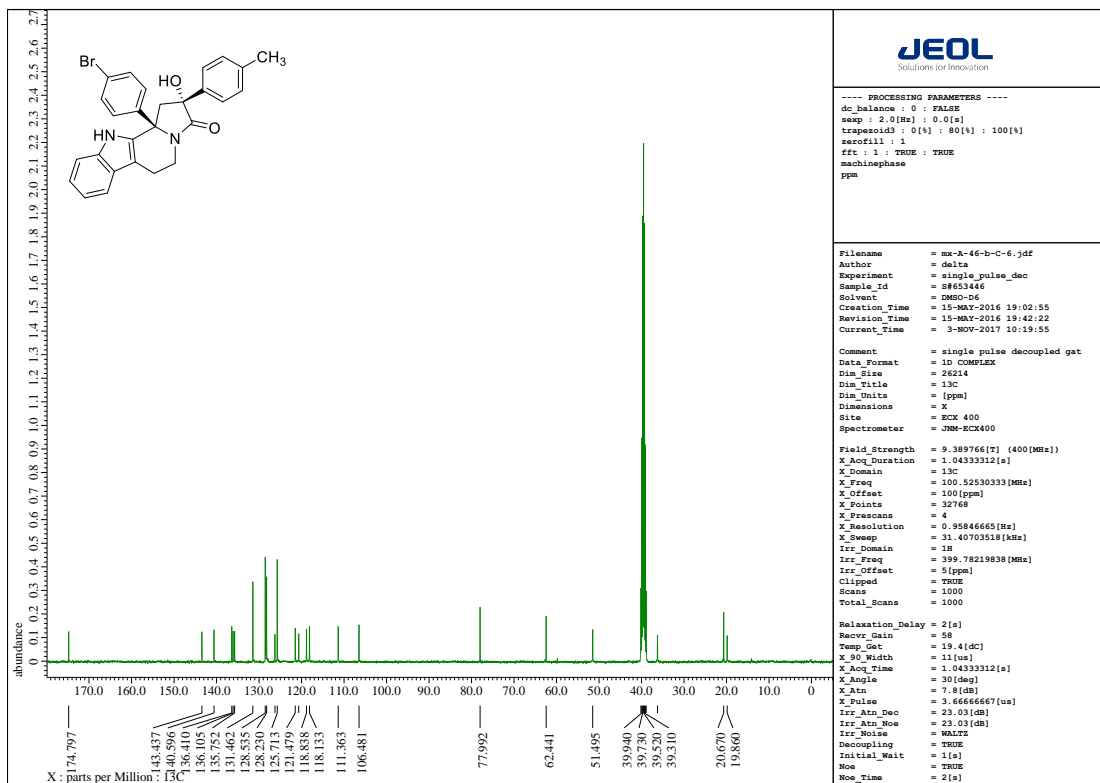

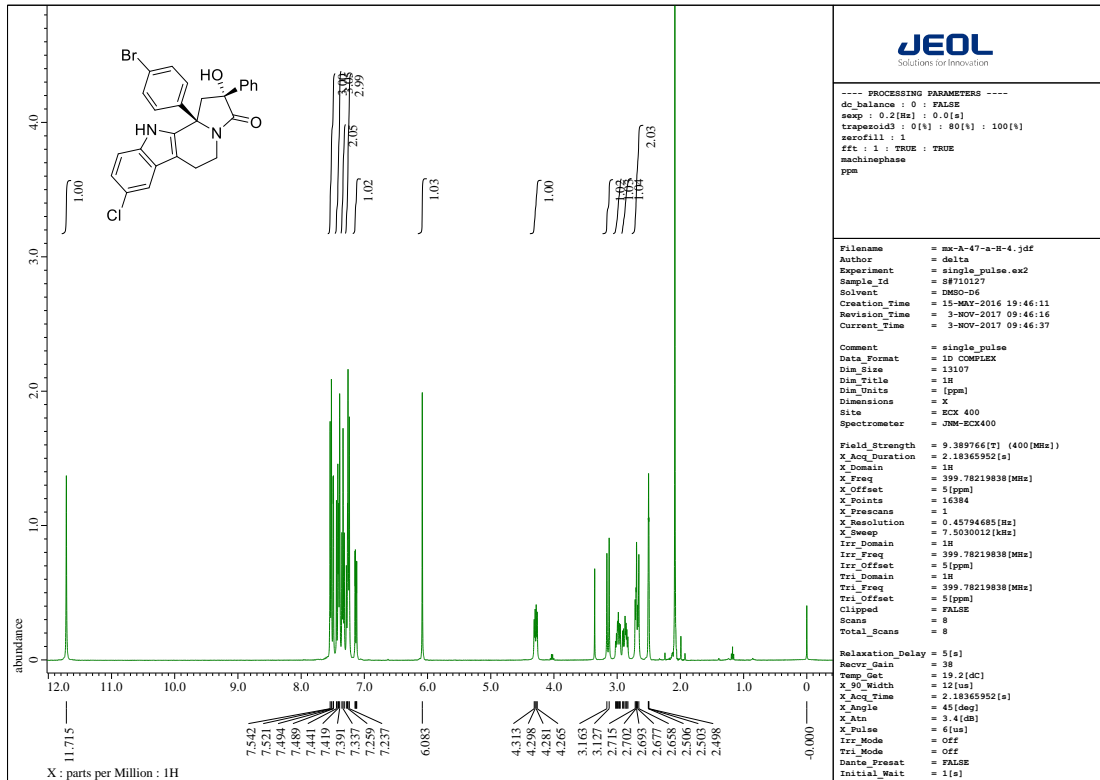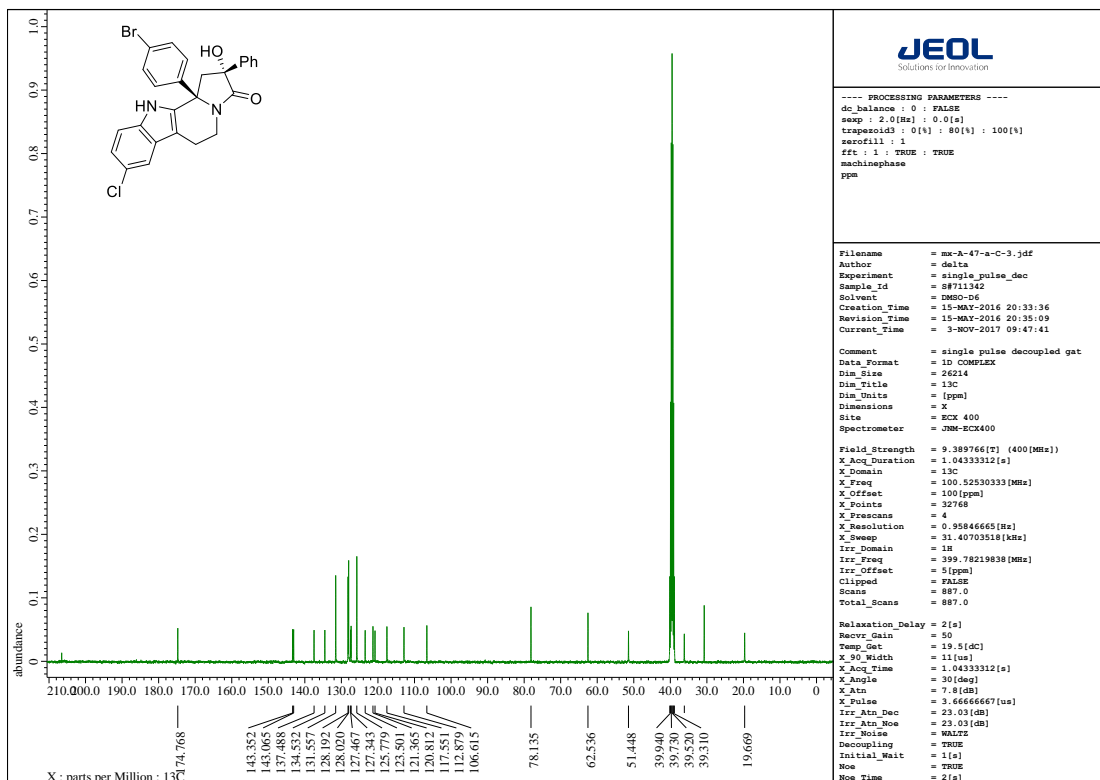

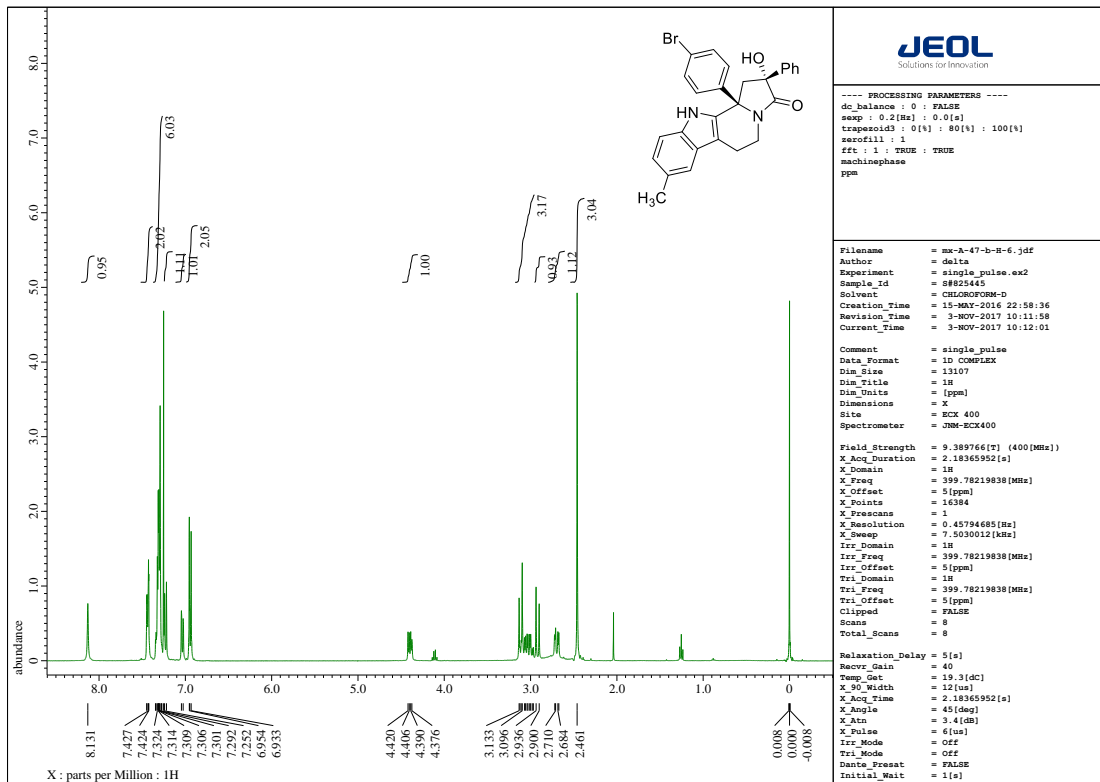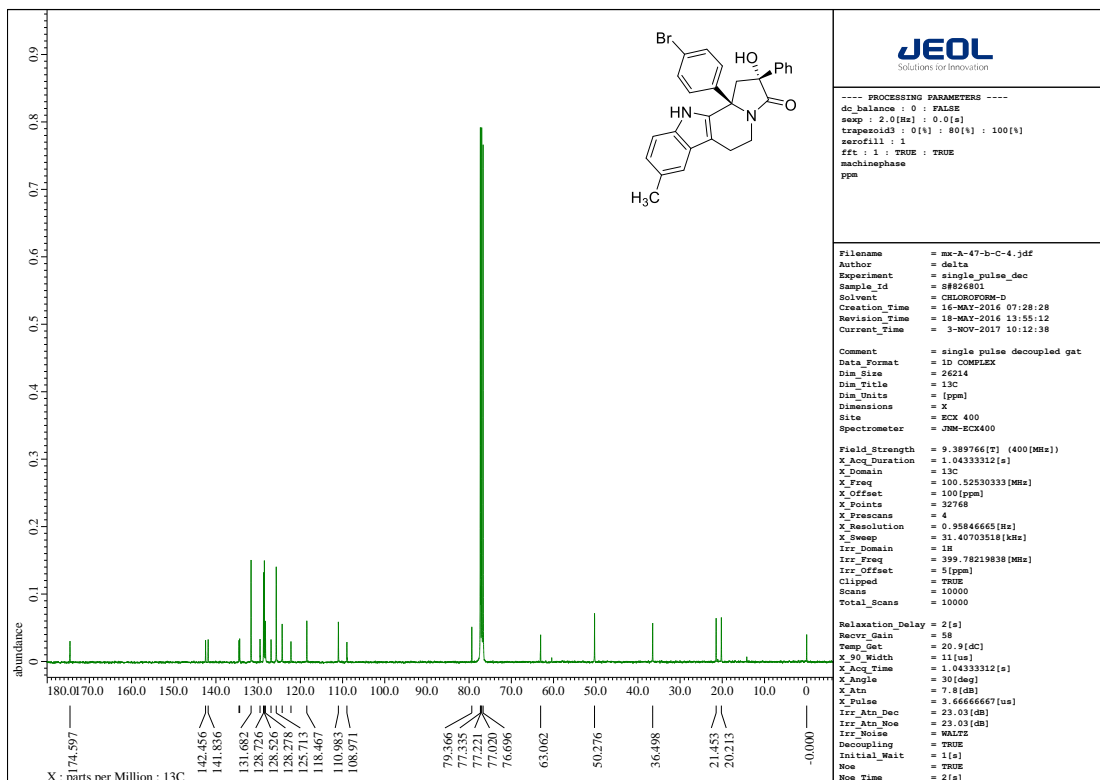

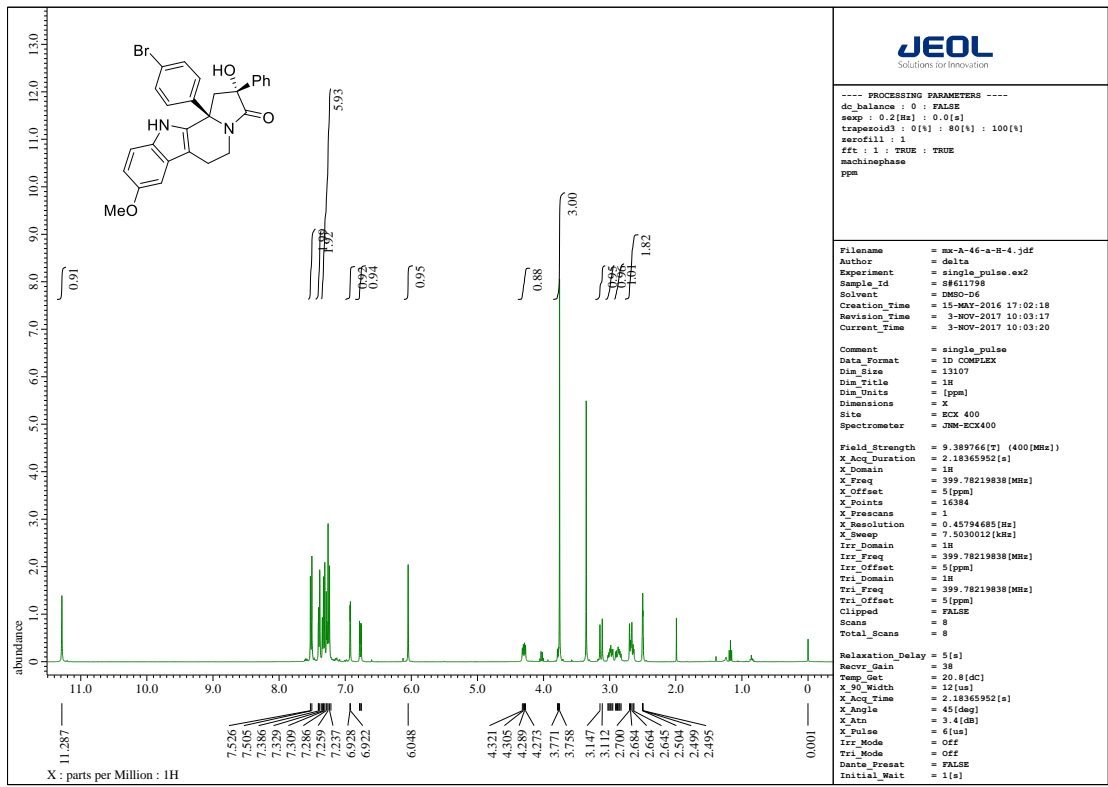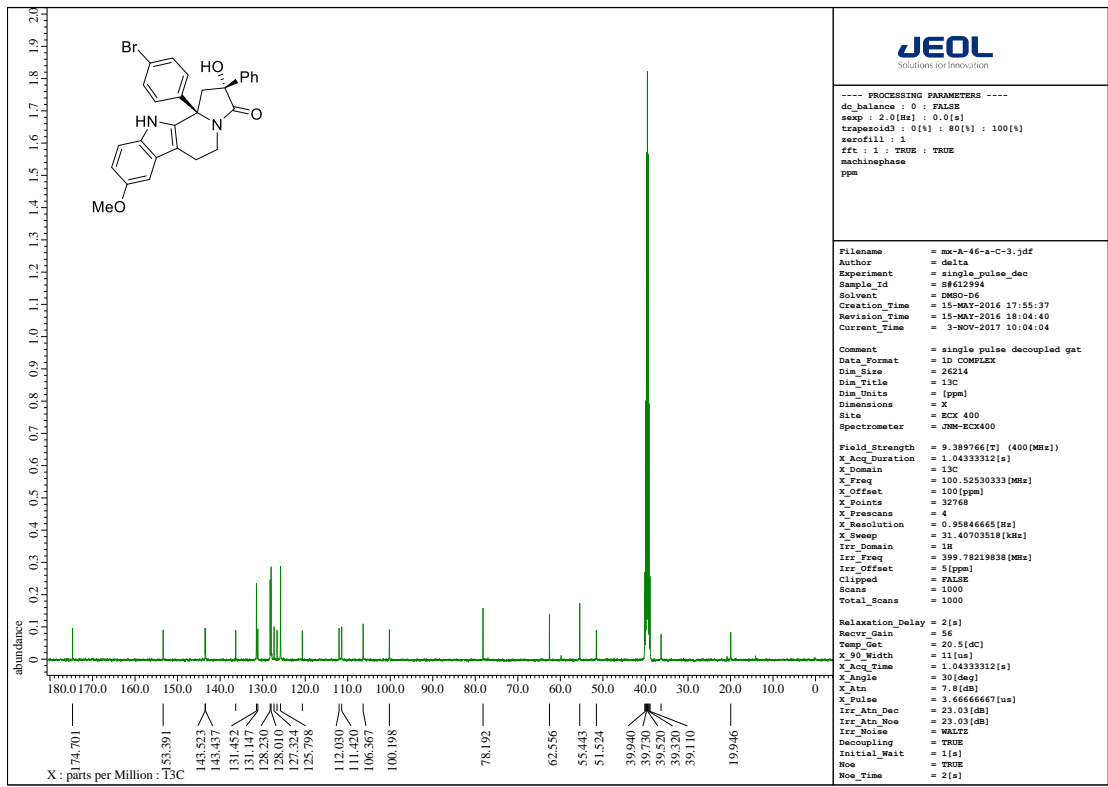

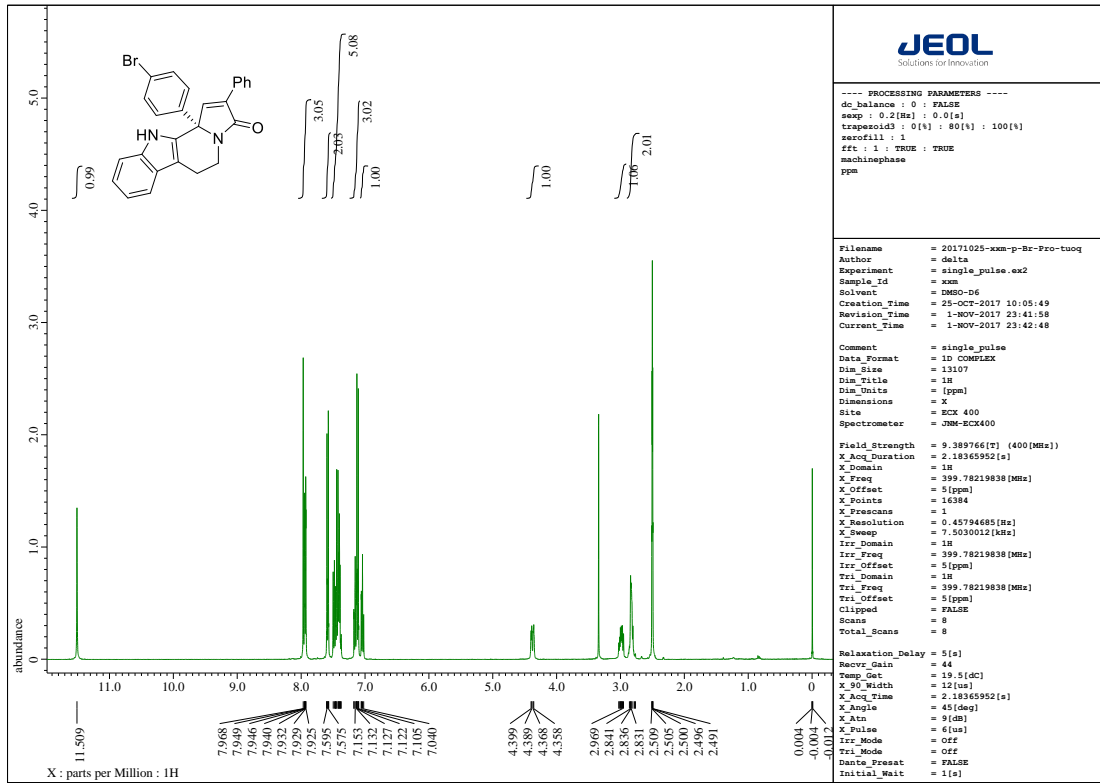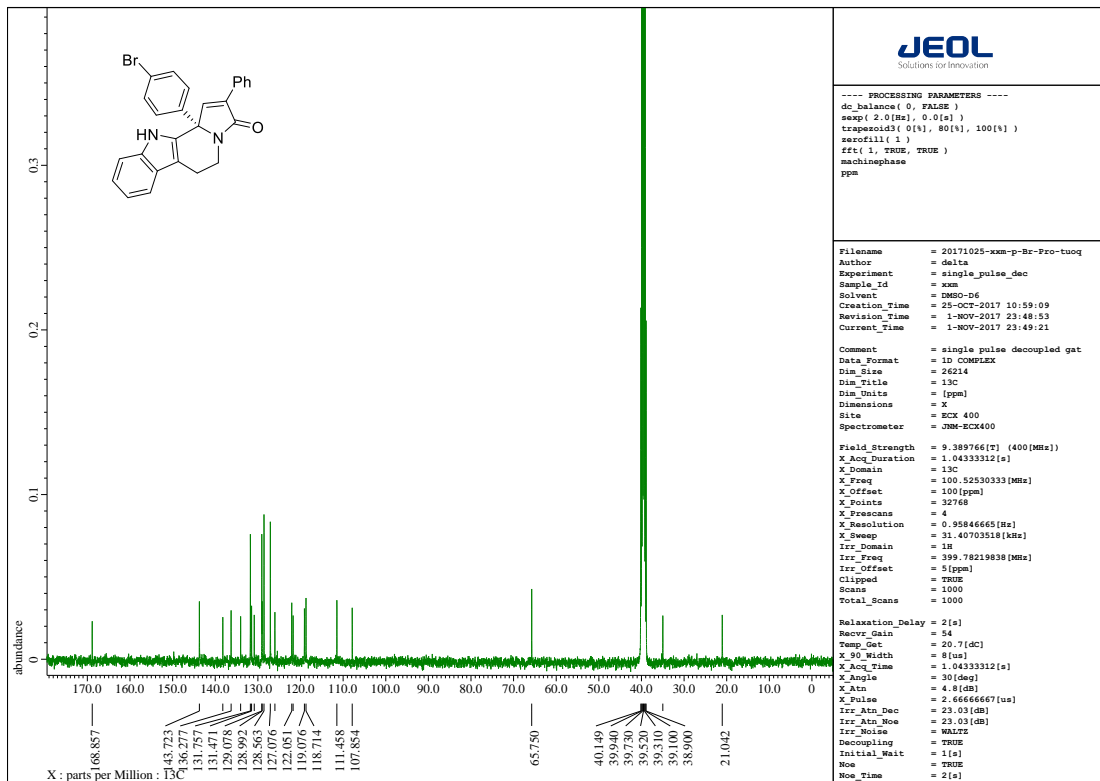





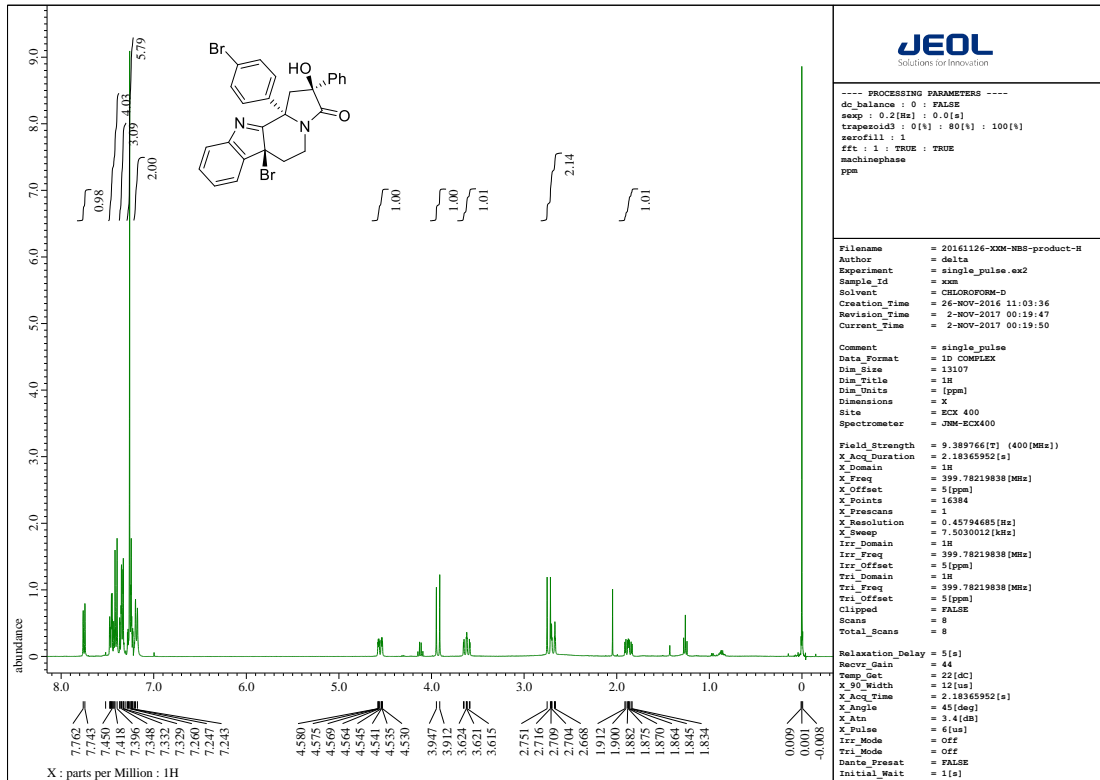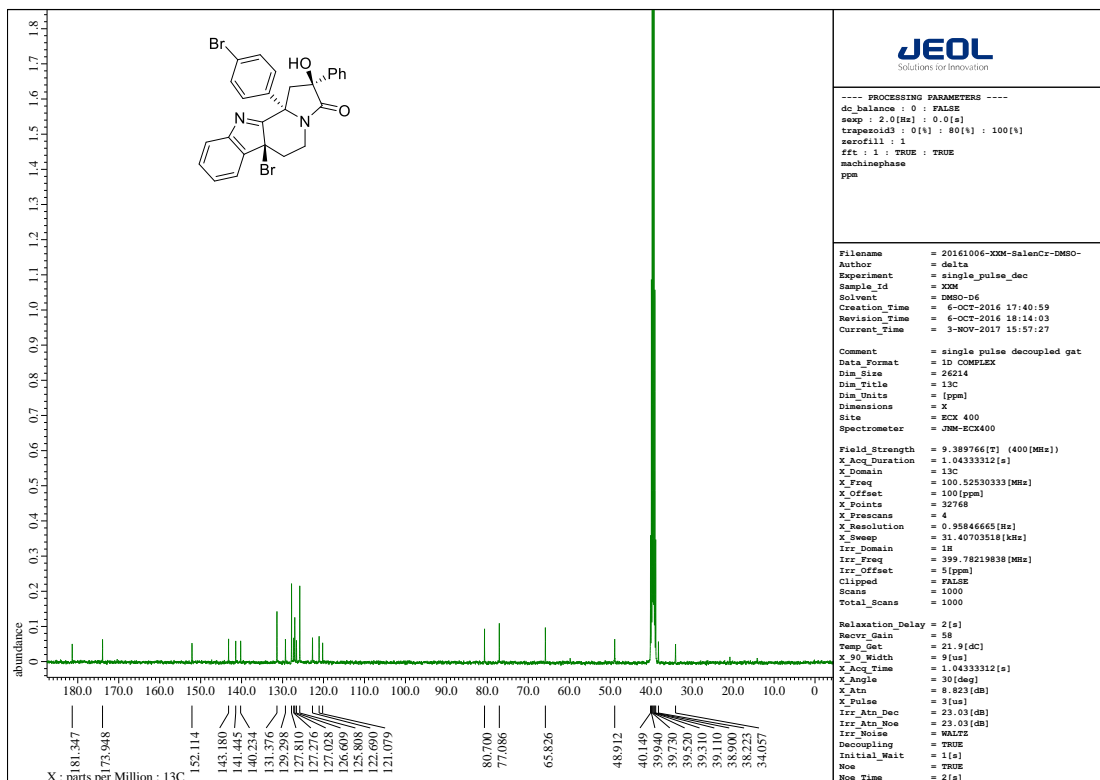

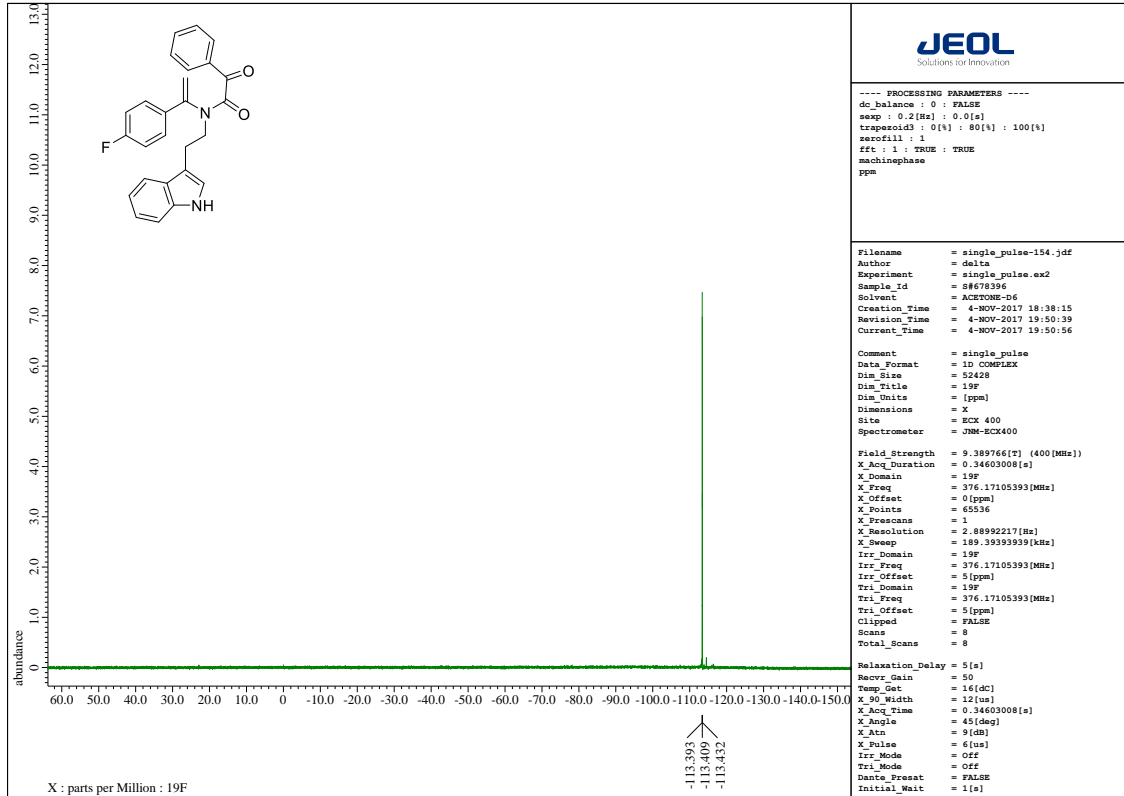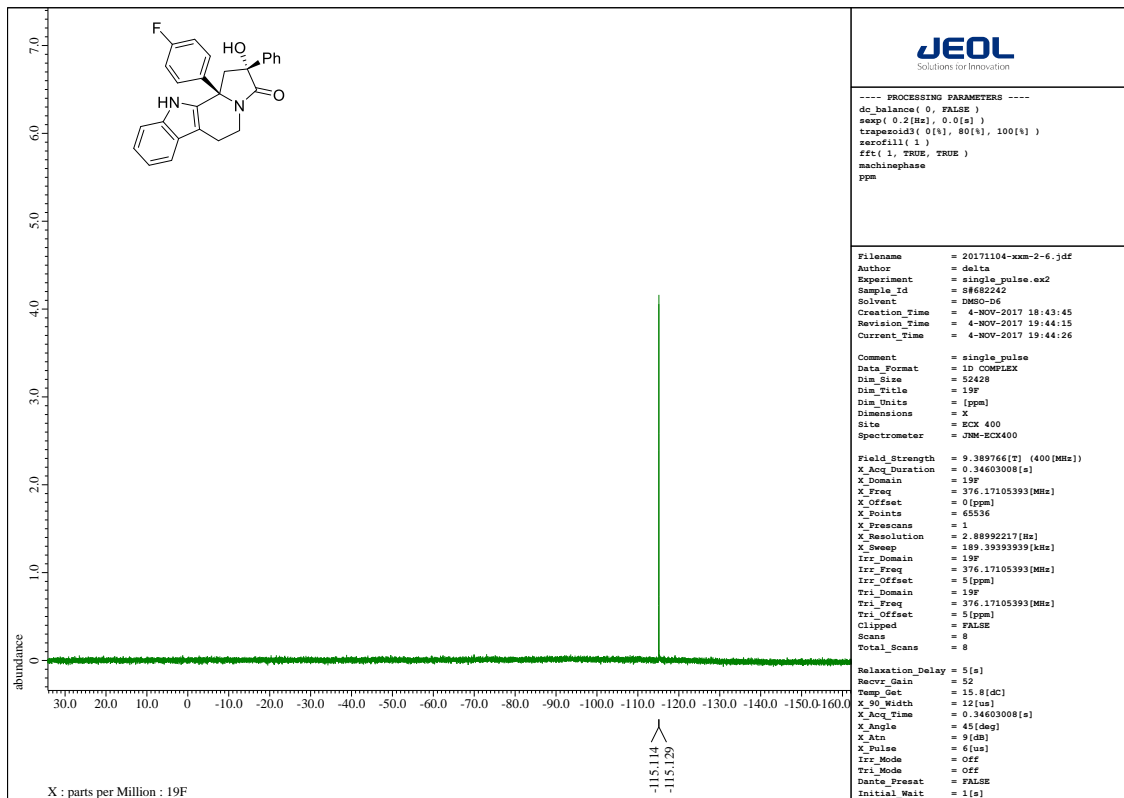

Supplement: d0qo01147a1.pdf [file d0qo01147a1.pdf]
